# Supplementary material for: Spiro[pyrrolidine-3, 3´-oxindole] as potent anti-breast cancer compounds: Their design, synthesis, biological evaluation and cellular target identification
Source: PubMed Central journal article supplement (PMC5004205; doi:10.1038/srep32213), 2016-08-30
Supplement: srep32213-s1.pdf [file srep32213-s1.pdf]

## **Spiro[pyrrolidine-3, 3'-oxindole] as potent anti-breast cancer compounds: Their design, synthesis, biological evaluation and cellular target identification**

Santanu Hati,<sup>1</sup> Sayantan Tripathy,<sup>2</sup> Pratip Kumar Dutta,<sup>1</sup> Rahul Agarwal,<sup>2</sup> Ramprasad Srinivasan,<sup>3</sup> Ashutosh Singh,<sup>2</sup> Shailja Singh,<sup>2</sup> and Subhabrata Sen<sup>1,\*</sup>

- <sup>1.</sup> Department of Chemistry, School of Natural Sciences, Shiv Nadar University, Dadri, Chithera, Gautam Buddha Nagar, 201314, Uttar Pradesh, India. Email: [Subhabrata.sen@snu.edu.in](mailto:Subhabrata.sen@snu.edu.in)
- <sup>2.</sup> Department of Life Sciences, School of Natural Sciences, Shiv Nadar University, Dadri, Chithera, Gautam Buddha Nagar, 201314, Uttar Pradesh, India.
- <sup>3.</sup> Shantani Proteome Analytics Pvt. Ltd. 100 NCL Innovation Park, Dr. Homi Bhabha Road, Pune-411008, India

1. Chemistry
2. Biology
3. NMR spectra
4. HPLC spectra
5. HPLC-MS-Chip information for target deconvolution
6. Cell migration studies
7. Target validation for unique polymer technology (UPT) for target deconvolution

## Chemistry

All reactions were carried out in flame-dried tubes with magnetic stirring. Unless otherwise noted, all experiments were performed under argon atmosphere. All reagents were purchased from Sigma Aldrich, Acros or Alfa Aesar. Solvents were treated with 4 Å molecular sieves or sodium and distilled prior to use. Purifications of reaction products were carried out by Flash chromatography using Biotage's 10 channel chromatographic system. <sup>1</sup>H NMR and <sup>13</sup>C NMR spectra were recorded with tetramethylsilane (TMS) as internal standard at ambient temperature unless otherwise indicated Bruker 500 MHz for <sup>1</sup>H NMR and 120 MHz for <sup>13</sup>C NMR. Chemical shifts are reported in parts per million (ppm) and coupling constants are reported as Hertz (Hz). Splitting patterns are designated as singlet (s), broad singlet (bs), doublet (d), triplet (t). Splitting patterns that could not be interpreted or easily visualized are designated as multiple (m). The Mass Spectrometry analysis was done on the 6540 UHD Accurate-Mass Q-TOF LC/MS system (Agilent Technologies) equipped with Agilent 1290 LC system obtained by the Dept. of Chemistry, School of Natural Sciences, Shiv Nadar University, Uttar Pradesh 203207, India.

### General procedure for the synthesis of 3, 3'-spiropyrrolooxindole

To a solution of the tryptamine (1.0 eq.) in 1:1 THF/water (20 mL), was added appropriate benzaldehydes (1 eq.), catalytic trifluoroacetic acid (TFA) and the reaction mixture was cooled to 0°C, followed by portion wise addition of N-bromosuccinimide (NBS) (1.1 eq.). The resulting solution was stirred at 0°C for 6h after which it was gradually warmed to room temperature (rt). Once TLC confirms the total consumption of the starting imine, the reaction was quenched with saturated sodium carbonate solution. The aqueous layer was extracted twice with dichloromethane. The organic extracts were combined and washed with brine, dried over anhydrous magnesium sulphate and was evaporated to provide the crude compound. It was purified by flash column chromatography using a mixture of ethyl acetate and hexane as eluent to afford the desired 3, 3'-spiropyrrolooxindole **5a-m**.

### 2'-(p-tolyl)spiro[indoline-3,3'-pyrrolidin]-2-one (**5a**)

Following the general procedure tryptamine (200 mg, 1.25 mmol), *p*-tolualdehyde (150 mg, 1.25 mmol) 1:1 THF/water (20 mL) with catalytic TFA and NBS (197.5 mg, 1.37 mmol) provided the desired compound **5a** in 260 mg (yield 75%) as viscous oil. <sup>1</sup>H NMR (500 MHz; DMSO-d<sub>6</sub>):

9.91 (s, 1H); 7.41 (d,  $J = 10$  Hz, 1H); 7.21 (d,  $J = 10$  Hz, 1H); 7.18-7.13 (m, 4H); 7.02-6.99 (t,  $J = 10$  Hz, 1H); 6.97-6.93 (t,  $J = 10$  Hz, 1H); 4.37 (s, 1H); 3.09-3.06 (m, 1H); 2.95-2.92 (m, 1H); 2.76-2.72 (m, 1H); 2.69-2.65 (m, 1H); 2.30 (s, 3H).  $^{13}\text{C}$  NMR (125 MHz; DMSO- $d_6$ ): 181.1, 140.0, 136.3, 135.9, 135.4, 128.7, 128.4, 126.8, 120.5, 118.2, 111.0, 71.3, 59.5, 45.1, 37.2, 20.7. HRMS (ESI-TOF)  $m/z$ :  $[\text{M} + \text{H}]^+$  Calcd for  $\text{C}_{18}\text{H}_{19}\text{N}_2\text{O}$  - 279.1492, Found - 279.1468; IR 3216.67, 2907.60, 1698.53, 1469.84.

#### 2'-(3-(trifluoromethyl)phenyl)spiro[indoline-3,3'-pyrrolidin]-2-one (**5b**)

Following the general procedure tryptamine (200 mg, 1.25 mmol), 3-trifluoromethylbenzaldehyde (217.6 mg, 1.25 mmol), 1:1 THF/water (20 mL), catalytic TFA and NBS (197.5 mg, 1.37 mmol) provided the desired compound **5b** in 289 mg (yield 70%) as gummy solid.  $^1\text{H}$  NMR (500 MHz; DMSO- $d_6$ ): 10.00 (s, 1H); 7.53-7.49 (m, 2H); 7.37-7.34 (t,  $J = 10$  Hz, 1H); 7.21 (s, 1H); 7.17-7.16 (t,  $J = 5$  Hz, 1H); 7.11 (d,  $J = 10$  Hz, 1H); 7.07-7.04 (t,  $J = 5$  Hz, 1H); 6.67 (d,  $J = 5$  Hz, 1H); 4.46 (s, 1H); 3.53-3.49 (m, 1H); 3.47-3.43 (m, 1H); 3.17-3.11 (m, 1H); 3.06-3.01 (m, 1H).  $^{13}\text{C}$  NMR (125 MHz; DMSO- $d_6$ ): 179.5, 142.0, 139.2, 131.8, 130.1, 128.6, 127.9, 123.9, 123.9, 122.9, 122.8, 122.8, 121.8, 109.0, 72.2, 59.0, 45.9, 37.5. HRMS (ESI-TOF)  $m/z$ :  $[\text{M} + \text{H}]^+$  Calcd for  $\text{C}_{18}\text{H}_{16}\text{F}_3\text{N}_2\text{O}$  - 333.1209, Found - 333.1180; IR 3252.51, 3006.19, 1674.57, 1440.16.

#### 2'-(3,5-dimethylphenyl)spiro[indoline-3,3'-pyrrolidin]-2-one (**5c**)

Following the general procedure tryptamine (200 mg, 1.25 mmol), 3, 5-dimethylbenzaldehyde (167.7 mg, 1.25 mmol), 1:1 THF/water (20 mL) with catalytic TFA and NBS (197.5 mg, 1.37 mmol) provided the desired compound **5c** in 271 mg (yield 74%) as yellow liquid.  $^1\text{H}$  NMR (500 MHz; DMSO- $d_6$ ): 9.98 (s, 1H); 7.54 (d,  $J = 10$  Hz, 1H); 7.32 (d,  $J = 5$  Hz, 1H); 7.14-7.11 (m, 2H); 7.07-7.04 (t,  $J = 10$  Hz, 1H); 7.02 (s, 2H); 4.24 (s, 1H); 3.49-3.41 (m, 2H); 3.15-3.11 (m, 1H); 3.04-3.00 (m, 1H); 2.29 (s, 6H).  $^{13}\text{C}$  NMR (125 MHz; DMSO- $d_6$ ): 179.9, 138.1, 136.6, 134.7, 131.2, 128.6, 127.5, 125.7, 121.9, 119.1, 111.7, 71.0, 54.9, 44.7, 37.7, 20.9. HRMS (ESI-TOF)  $m/z$ :  $[\text{M} + \text{H}]^+$  Calcd for  $\text{C}_{19}\text{H}_{21}\text{N}_2\text{O}$  - 293.1648, Found - 293.1623; IR 3230.46, 2923.48, 1673.98, 1470.75.

#### 2'-(2,6-difluorophenyl)spiro[indoline-3,3'-pyrrolidin]-2-one (**5d**)

Following the general procedure tryptamine (200 mg, 1.25 mmol), 2, 6-difluorobenzaldehyde (177.5 mg, 1.25 mmol), 1:1 THF/water (20 mL) with catalytic TFA and NBS (197.5 mg, 1.37 mmol) provided the desired compound **5d** in 291 mg (yield 78%) as colorless liquid. <sup>1</sup>H NMR (500 MHz; DMSO-d<sub>6</sub>): 10.34 (s, 1H); 7.66-7.63 (m, 1H); 7.55-7.51 (m, 1H); 7.39-7.37 (m, 1H); 7.29-7.23 (m, 2H); 7.12-7.10 (m, 1H); 7.06-7.04 (m, 1H); 4.91 (s, 1H); 3.62-3.60 (m, 1H); 3.51-3.49 (m, 1H); 3.12-3.09 (m, 1H), 3.03-3.01 (m, 1H). <sup>13</sup>C NMR (125 MHz; DMSO-d<sub>6</sub>):181.9, 162.9, 160.9, 138.7, 136.9, 128.5, 126.5, 122.4, 119.7, 118.8, 113.2, 113.1, 112.1, 66.3, 48.2, 29.9. HRMS (ESI-TOF) m/z: [M + H]<sup>+</sup>Calcd for C<sub>17</sub>H<sub>15</sub>F<sub>2</sub>N<sub>2</sub>O - 301.114, Found - 301.1116; IR 3253.06, 2962.24, 1667.18, 1473.61.

#### 2'-(3-fluorophenyl)spiro[indoline-3,3'-pyrrolidin]-2-one (**5e**)

Following the general procedure tryptamine (200 mg, 1.25 mmol), 3-fluorobenzaldehyde (155 mg, 1.25 mmol) 1:1 THF/water (20 mL) with catalytic TFA and NBS (197.5 mg, 1.37 mmol) provided the desired compound **5e** in 310 mg (yield 88%) as light yellow liquid. <sup>1</sup>H NMR (500 MHz; DMSO-d<sub>6</sub>): 10.25 (s, 1H); 7.63-7.60 (m, 2H); 7.58-7.55 (m, 1H); 7.52 (d, *J* = 10 Hz, 1H); 7.44 (d, *J* = 10 Hz, 1H); 7.40-7.36 (t, *J* = 10 Hz, 1H); 7.24-7.20 (t, *J* = 10 Hz, 1H); 7.10-7.07 (t, *J* = 10 Hz, 1H); 4.64 (s, 1H); 3.60-3.57 (m, 1H); 3.50-3.46 (m, 1H); 3.14-3.06 (m, 1H), 3.05-2.96 (m, 1H). <sup>13</sup>C NMR (125 MHz; DMSO-d<sub>6</sub>):181.3, 161.2, 139.8, 137.0, 130.6, 127.2, 124.8, 124.2, 123.9, 119.6, 116.7, 114.8, 112.8, 65.8, 47.9, 29.3. HRMS (ESI-TOF) m/z: [M + H]<sup>+</sup>Calcd for C<sub>17</sub>H<sub>16</sub>FN<sub>2</sub>O-283.1241, Found - 283.1210; IR 3392.30, 2918.94, 2848.13, 1485.07.

#### 2'-(3-methoxyphenyl)spiro[indoline-3,3'-pyrrolidin]-2-one(**5f**)

Following the general procedure tryptamine (200 mg, 1.25 mmol), 3-methoxybenzaldehyde (170.2 mg, 1.25 mmol), 1:1 THF/water (20 mL) with catalytic TFA and NBS (197.5 mg, 1.37 mmol) provided the desired compound with catalytic TFA and NBS (158 mg, 1.1 mmol) in water (10 mL) provided the desired compound **5f** in 301 mg (yield 82%) as light yellow oil. <sup>1</sup>H NMR (500 MHz; DMSO-d<sub>6</sub>): 9.96 (s, 1H); 7.41 (d, *J* = 10 Hz, 1H); 7.26-7.22 (m, 2H); 7.02-6.99 (t, *J* = 10 Hz, 1H); 6.96-6.93 (t, *J* = 5 Hz, 1H); 6.88-6.85 (t, *J* = 5 Hz, 3H); 4.37 (s, 1H); 3.73 (s, 3H), 3.10-3.07 (m, 1H); 2.95-2.92 (m, 1H); 2.75-2.72 (m, 1H), 2.68-2.63 (m, 1H). <sup>13</sup>C NMR (125 MHz; DMSO-d<sub>6</sub>):180.9, 159.2, 144.6, 135.9, 135.2, 129.1, 126.8, 120.6, 120.5,

117.5, 114.2, 112.5, 111.1, 71.2, 59.8, 56.6, 45.1, 37.2. HRMS (ESI-TOF)  $m/z$ :  $[M + H]^+$  Calcd for  $C_{18}H_{19}N_2O_2$  - 295.1441, Found -295.1420; IR 3299.7, 2895.16, 1698.53, 1596.14.

2'-(3,4-dimethoxyphenyl)spiro[indoline-3,3'-pyrrolidin]-2-one (**5g**)

Following the general procedure tryptamine (200 mg, 1.25 mmol), 3, 4-dimethoxybenzaldehyde (207.5 mg, 1.25 mmol), 1:1 THF/water (20 mL) with catalytic TFA and NBS (197.5 mg, 1.37 mmol) provided the desired compound **5g** in 381 mg (yield 94%) as colorless liquid.  $^1H$  NMR (500 MHz; DMSO- $d_6$ ): 9.83 (s, 1H); 7.40 (d,  $J = 10$  Hz, 1H); 7.23 (d,  $J = 5$  Hz, 1H); 7.01-6.98 (t,  $J = 10$  Hz, 1H); 6.96-6.94 (m, 2H); 6.89 (d,  $J = 10$  Hz, 1H); 6.76 (d,  $J = 5$  Hz, 1H); 4.32 (s, 1H); 3.73 (s, 3H), 3.71 (s, 3H); 3.13-3.11 (m, 1H); 2.94-2.92 (m, 1H); 2.76-2.73 (m, 1H), 2.67-2.63 (m, 1H).  $^{13}C$  NMR (125 MHz; DMSO- $d_6$ ): 181.2, 148.6, 148.1, 135.9, 135.8, 135.6, 126.9, 120.4, 118.1, 117.5, 112.2, 111.4, 111.0, 71.4, 59.9, 55.6, 55.4, 44.9, 37.3. HRMS (ESI-TOF)  $m/z$ :  $[M + H]^+$  Calcd for  $C_{19}H_{21}N_2O_3$  - 325.1547, Found 325.1550.

2'-(4-methoxyphenyl)spiro[indoline-3,3'-pyrrolidin]-2-one (**5h**)

Following the general procedure tryptamine (200 mg, 1.25 mmol), 3-methoxybenzaldehyde (170.2, 1.25 mmol), 1:1 THF/water (20 mL) with catalytic TFA and NBS (197.5 mg, 1.37 mmol) provided the desired compound **5h** in 291 mg (yield 79%) as colorless liquid.  $^1H$  NMR (500 MHz; DMSO- $d_6$ ): 9.86 (s, 1H); 7.41 (d,  $J = 10$  Hz, 1H); 7.23-7.19 (m, 3H); 7.02-6.99 (t,  $J = 10$  Hz, 1H); 6.97-6.93 (t,  $J = 10$  Hz, 1H); 6.90 (d,  $J = 10$  Hz, 2H); 4.38 (s, 1H); 3.74 (s, 3H), 3.10-3.08 (m, 1H); 2.96-2.93 (m, 1H); 2.75-2.72 (m, 1H), 2.69-2.66 (m, 1H).  $^{13}C$  NMR (125 MHz; DMSO- $d_6$ ): 181.0, 158.6, 135.9, 135.4, 134.7, 129.6, 126.8, 120.5, 117.5, 113.5, 111.0, 70.9, 59.7, 56.0, 44.9, 37.3. HRMS (ESI-TOF)  $m/z$ :  $[M + H]^+$  Calcd for  $C_{18}H_{19}N_2O_2$  - 295.1441, Found -295.1411; IR 3308.93, 2917.17, 1673.91, 1608.89.

2'-(2,4,5-trimethoxyphenyl)spiro[indoline-3,3'-pyrrolidin]-2-one (**5i**)

Following the general procedure tryptamine (200 mg, 1.25 mmol), 2, 4, 5-trimethoxybenzaldehyde (245 mg, mmol), 1:1 THF/water (20 mL) with catalytic TFA and NBS (197.5 mg, 1.37 mmol) provided the desired compound **5i** in 325 mg (yield 73%) as white semi solid.  $^1H$  NMR (500 MHz; DMSO- $d_6$ ): 9.82 (s, 1H); 7.56 (d,  $J = 5$  Hz, 1H); 7.36 (d,  $J = 10$  Hz, 1H); 7.16-7.13 (t,  $J = 10$  Hz, 1H); 7.04-7.01 (t,  $J = 10$  Hz, 1H); 6.93 (s, 1H); 6.82 (s, 1H), 4.34 (s, 1H); 3.73 (s, 6H), 3.66 (s, 3H), 3.20-3.18 (m, 1H); 2.95-2.93 (m, 1H); 2.79-2.76 (m,

1H), 2.67-2.63 (m, 1H). <sup>13</sup>C NMR (125 MHz; DMSO-d<sub>6</sub>):181.2, 157.9, 151.6, 150.5, 142.6, 136.6, 129.0, 124.7, 123.2, 119.3, 119.1, 113.7, 112.4, 71.4, 59.5, 56.1, 56.0, 55.8, 44.8, 37.0. HRMS (ESI-TOF) m/z: [M + H]<sup>+</sup>Calcd for C<sub>20</sub>H<sub>23</sub>N<sub>2</sub>O<sub>4</sub> - 355.1652, Found-355.1656; IR 3312.03, 1719.32, 1458.50, 1215.77.

2'-(2-fluoro-4-methoxyphenyl)spiro[indoline-3,3'-pyrrolidin]-2-one (**5j**)

Following the general procedure tryptamine (200 mg, 1.25 mmol), 2-fluoro-4-methoxybenzaldehyde (192.5 mg, 1.25 mmol), 1:1 THF/water (20 mL) with catalytic TFA and NBS (197.5 mg, 1.37 mmol) provided the desired compound **5j** in 301 mg (yield 77%) as yellow liquid. <sup>1</sup>H NMR (500 MHz; DMSO-d<sub>6</sub>): 10.18 (s, 1H); 7.42 (d, *J* = 10 Hz, 1H); 7.22 (d, *J* = 10 Hz, 1H); 7.03-7.00 (t, *J* = 10 Hz, 1H); 6.97-6.94 (t, *J* = 5 Hz, 1H); 6.89-6.85 (m, 2H); 6.68 (d, *J* = 10 Hz, 1H), 4.69 (s, 1H); 3.75 (s, 3H), 3.03-3.00 (m, 1H); 2.94-2.92 (m, 1H); 2.75-2.72 (m, 1H), 2.68-2.64 (m, 1H). <sup>13</sup>C NMR (125 MHz; DMSO-d<sub>6</sub>): 181.6, 161.9, 160.0, 135.9, 134.4, 130.6, 126.8, 121.8, 120.6, 118.2, 117.5, 111.0, 108.9, 64.5, 55.6, 46.4, 37.7, 29.7. HRMS (ESI-TOF) m/z: [M + H]<sup>+</sup>Calcd for C<sub>18</sub>H<sub>18</sub>FN<sub>2</sub>O<sub>2</sub> - 313.1347, Found - 313.1317; IR 3217.99, 2923.44, 1673.98, 1503.47.

2'-(4-methoxy-3-methylphenyl)spiro[indoline-3,3'-pyrrolidin]-2-one (**5k**)

Following the general procedure tryptamine (200 mg, 1.25 mmol), 4-methoxy-3-methylbenzaldehyde (187.5 mg, 1.25 mmol), with catalytic TFA and NBS (158 mg, 1.1 mmol) in water (10 mL) provided the desired compound **5k** in 342 mg (yield 88%) as white semi solid. <sup>1</sup>H NMR (500 MHz; DMSO-d<sub>6</sub>): 9.83, (s, 1H); 7.46 (d, *J* = 5 Hz, 1H); 7.25 (d, *J* = 10 Hz, 1H); 7.14-7.12 (m, 2H); 7.06-7.03 (t, *J* = 5 Hz, 1H); 7.00 (d, *J* = 5 Hz, 1H); 6.97-6.94 (m, 1H), 4.37 (s, 1H); 3.79 (s, 3H), 3.26-3.24 (m, 1H); 3.14-3.12 (m, 1H); 2.91-2.90 (m, 1H), 2.83-2.79 (m, 1H), 2.13 (s, 3H). <sup>13</sup>C NMR (125 MHz; DMSO-d<sub>6</sub>): 181.2, 157.4, 136.2, 132.7, 131.0, 127.9, 126.4, 125.4, 121.1, 118.5, 117.8, 111.3, 110.1, 71.2, 59.7, 55.6, 44.9, 37.2, 20.4. HRMS (ESI-TOF) m/z: [M + H]<sup>+</sup>Calcd for C<sub>19</sub>H<sub>21</sub>N<sub>2</sub>O<sub>2</sub> - 309.1598, Found -309.1608.

2'-phenylspiro[indoline-3,3'-pyrrolidin]-2-one (**5l**)

Following the general procedure tryptamine (200 mg, 1.25 mmol), benzaldehyde (132.5 mg, 1.25 mmol) 1:1 THF/water (20 mL) with catalytic TFA and NBS (197.5 mg, 1.37 mmol) provided the desired compound **5l** in 311 mg (yield 94%) as orange liquid. <sup>1</sup>H NMR (500 MHz; DMSO-d<sub>6</sub>):

9.99 (s, 1H); 7.50 (d,  $J = 10$  Hz, 1H); 7.44-7.36 (m, 5H); 7.31 (d,  $J = 5$  Hz, 1H); 7.11-7.07 (t,  $J = 10$  Hz, 1H); 7.04-7.01 (t,  $J = 5$  Hz, 1H); 4.48 (s, 1H); 3.29-3.26 (m, 1H); 3.22-3.18 (m, 1H); 2.98-2.93 (m, 1H), 2.90-2.85 (m, 1H).  $^{13}\text{C}$  NMR (125 MHz; DMSO- $d_6$ ): 181.3, 139.0, 136.3, 131.9, 129.2, 128.5, 128.1, 126.3, 121.3, 118.7, 111.4, 71.0, 59.4, 45.1, 37.1. HRMS (ESI-TOF)  $m/z$ :  $[\text{M} + \text{H}]^+$  Calcd for  $\text{C}_{17}\text{H}_{17}\text{N}_2\text{O}$  - 265.1335, Found - 265.1312; IR 2993.23, 2559.81, 1667.05, 1433.91.

#### 2'-(2,5-bis(trifluoromethyl)phenyl)spiro[indoline-3,3'-pyrrolidin]-2-one (**5m**)

Following the general procedure tryptamine (200 mg, 1.25 mmol), 2, 5-bistrifluoromethylbenzaldehyde (302.5 mg, 1.25 mmol) with catalytic TFA and NBS (158 mg, 1.1 mmol) in water (10 mL) provided the desired compound **5m** in 225 mg (yield 45%) as viscous liquid.  $^1\text{H}$  NMR (500 MHz; DMSO- $d_6$ ): 10.28 (s, 1H); 8.06 (s, 1H); 7.98 (s, 2H); 7.45 (d,  $J = 10$  Hz, 1H); 7.26 (d,  $J = 5$  Hz, 1H); 7.06-7.03 (t,  $J = 10$  Hz, 1H); 7.00-6.97 (t,  $J = 10$  Hz, 1H); 4.67 (s, 1H); 3.09-3.06 (m, 1H); 3.01-2.97 (m, 1H); 2.81-2.77 (m, 1H), 2.71-2.68 (m, 1H).  $^{13}\text{C}$  NMR (125 MHz; DMSO- $d_6$ ): 177.2, 146.6, 136.1, 133.8, 129.9, 129.2, 126.7, 124.5, 122.4, 120.9, 118.5, 117.8, 111.1, 69.9, 56.8, 43.7, 35.2. HRMS (ESI-TOF)  $m/z$ :  $[\text{M} + \text{H}]^+$  Calcd for  $\text{C}_{19}\text{H}_{15}\text{F}_6\text{N}_2\text{O}$  - 401.1087, Found -401.1084; IR 3168.91, 2932.39, 1673.80, 1452.21.

#### 1-(*p*-tolyl)-2,3,4,4a,9,9a-hexahydro-1H-pyrido[3,4-*b*]indole (**4a**)

Following the general procedure tryptamine (50 mg, 0.31 mmol), *p*-tolualdehyde (38 mg, 0.31 mmol) 1:1 THF/water (7 mL) with catalytic TFA and NBS (50 mg, 0.34 mmol) provided the desired compound **4a** in 31 mg (yield 39%) as colorless solid in 4 hours time.  $^1\text{H}$  NMR (500 MHz; DMSO- $d_6$ ): 10.42 (s, 1H); 7.44 (d,  $J = 8$  Hz, 1H); 7.26 (d,  $J = 10$  Hz, 1H); 7.21-7.13 (m, 4H); 7.04-7.03 (m, 1H); 7.01-6.96 (m, 1H); 5.09 (s, 1H); 3.11-3.08 (m, 1H); 2.98-2.93 (m, 1H); 2.76-2.75 (m, 1H); 2.71-2.69 (m, 1H); 2.32 (s, 3H).  $^{13}\text{C}$  NMR (125 MHz; DMSO- $d_6$ ): 140.6, 136.8, 136.5, 135.9, 129.2, 128.9, 127.4, 120.9, 118.7, 118.01, 111.6, 108.6, 56.9, 41.8, 22.7, 21.3. HRMS (ESI-TOF)  $m/z$ :  $[\text{M} + \text{H}]^+$  Calcd for  $\text{C}_{18}\text{H}_{19}\text{N}_2$  - 263.2543, Found - 263.1531.

**1. Screening of compounds 5a-m against MCF-7 cells (48h)**

|   | 1     | 2     | 3     | 4     | 5     | 6     | 7     | 8     | 9     | 10    | 11    | 12    |
|---|-------|-------|-------|-------|-------|-------|-------|-------|-------|-------|-------|-------|
| A | 1.413 | 1.521 | 1.712 | 0.037 | 1.433 | 1.062 | 0.976 | 0.036 | 0.033 | 0.037 | 0.036 | 0.038 |
| B | 0.479 | 0.312 | 0.512 | 0.037 | 0.991 | 1.108 | 0.759 | 0.036 | 0.036 | 0.039 | 0.036 | 0.042 |
| C | 0.904 | 1.084 | 1.12  | 0.046 | 0.982 | 0.51  | 0.802 | 0.036 | 0.037 | 0.037 | 0.037 | 0.039 |
| D | 1.123 | 0.912 | 1.01  | 0.037 | 0.712 | 0.782 | 0.659 | 0.042 | 0.037 | 0.036 | 0.037 | 0.038 |
| E | 1.102 | 0.924 | 0.991 | 0.037 | 0.787 | 0.97  | 1.09  | 0.037 | 0.037 | 0.037 | 0.038 | 0.039 |
| F | 0.987 | 0.936 | 0.667 | 0.037 | 0.784 | 0.84  | 0.964 | 0.037 | 0.035 | 0.038 | 0.038 | 0.037 |
| G | 0.613 | 0.712 | 0.781 | 0.038 | 0.512 | 0.604 | 0.698 | 0.037 | 0.037 | 0.037 | 0.038 | 0.039 |
| H | 1.173 | 1.042 | 0.953 | 0.036 | 0.037 | 0.037 | 0.037 | 0.037 | 0.039 | 0.036 | 0.04  | 0.038 |

|           | O.D1  | O.D2  | O.D3  | AVG      | CTRL-TST | CTRL-TST *100 | stdev    |
|-----------|-------|-------|-------|----------|----------|---------------|----------|
| control   | 1.413 | 1.521 | 1.712 | 1.548667 | 0        | 0             | 0.151408 |
| eto       | 0.479 | 0.312 | 0.512 | 0.434333 | 1.114333 | 0.719544      | 71.95437 |
| <b>5b</b> | 0.904 | 1.084 | 1.12  | 1.036    | 0.512667 | 0.331037      | 33.10375 |
| <b>5c</b> | 1.123 | 0.912 | 1.01  | 1.015    | 0.533667 | 0.344598      | 34.45975 |
| <b>5a</b> | 1.102 | 0.924 | 0.991 | 1.005667 | 0.543    | 0.350624      | 35.06242 |
| <b>5d</b> | 0.987 | 0.936 | 0.667 | 0.863333 | 0.685333 | 0.442531      | 44.25312 |
| <b>5e</b> | 0.613 | 0.712 | 0.781 | 0.702    | 0.846667 | 0.546707      | 54.67068 |
| <b>5m</b> | 1.173 | 1.042 | 0.953 | 1.056    | 0.492667 | 0.318123      | 31.81231 |
| <b>5g</b> | 1.433 | 1.062 | 0.976 | 1.157    | 0.391667 | 0.252906      | 25.29057 |
| <b>5f</b> | 0.991 | 1.108 | 0.759 | 0.952667 | 0.596    | 0.384847      | 38.48472 |
| <b>5h</b> | 0.982 | 0.51  | 0.802 | 0.764667 | 0.784    | 0.506242      | 50.62419 |
| <b>5i</b> | 0.712 | 0.782 | 0.659 | 0.717667 | 0.831    | 0.536591      | 53.65906 |
| <b>5j</b> | 0.787 | 0.97  | 1.09  | 0.949    | 0.599667 | 0.387215      | 38.72148 |
| <b>5k</b> | 0.784 | 0.84  | 0.964 | 0.862667 | 0.686    | 0.442962      | 44.29617 |
| <b>5l</b> | 0.512 | 0.604 | 0.698 | 0.604667 | 0.944    | 0.609557      | 60.95566 |



## 2. Screening of compound 5a-m against COS-7 cells (48h)

|   | 1     | 2     | 3     | 4     | 5     | 6     | 7     | 8     | 9     | 10    | 11    | 12    |
|---|-------|-------|-------|-------|-------|-------|-------|-------|-------|-------|-------|-------|
| A | 1.213 | 1.412 | 1.312 | 0.037 | 1.492 | 1.312 | 1.039 | 0.039 | 0.038 | 0.038 | 0.036 | 0.036 |
| B | 0.212 | 0.268 | 0.4   | 0.039 | 0.712 | 0.815 | 1.037 | 0.039 | 0.039 | 0.04  | 0.038 | 0.038 |
| C | 1.109 | 0.912 | 1.1   | 0.043 | 0.925 | 0.982 | 1.038 | 0.043 | 0.04  | 0.04  | 0.04  | 0.043 |
| D | 1.072 | 0.813 | 0.918 | 0.049 | 1.07  | 1.21  | 1.043 | 0.036 | 0.039 | 0.039 | 0.039 | 0.04  |
| E | 1.21  | 1.05  | 1.215 | 0.038 | 1.31  | 1.289 | 1.042 | 0.039 | 0.038 | 0.037 | 0.037 | 0.045 |
| F | 1.051 | 1.271 | 1.252 | 0.044 | 1.201 | 1.412 | 1.043 | 0.037 | 0.037 | 0.04  | 0.044 | 0.042 |
| G | 1.356 | 1.398 | 1.043 | 0.053 | 1.31  | 0.981 | 1.039 | 0.038 | 0.038 | 0.041 | 0.04  | 0.043 |
| H | 1.091 | 1.217 | 1.649 | 0.042 | 0.042 | 0.038 | 0.036 | 0.04  | 0.036 | 0.041 | 0.038 | 0.047 |

|           | O.D1  | O.D2  | O.D3  | AVG      | CTRL-TES | CTRL-TEST/CTRL*100 | stdev    |
|-----------|-------|-------|-------|----------|----------|--------------------|----------|
| control   | 1.213 | 1.412 | 1.312 | 1.312333 | 0        | 0                  | 0.0995   |
| eto       | 0.212 | 0.268 | 0.4   | 0.293333 | 1.019    | 0.776479553        | 77.64796 |
| <b>5b</b> | 1.109 | 0.912 | 1.1   | 1.040333 | 0.272    | 0.207264415        | 20.72644 |
| <b>5c</b> | 1.072 | 0.813 | 0.918 | 0.934333 | 0.378    | 0.288036576        | 28.80366 |
| <b>5a</b> | 1.21  | 1.05  | 1.215 | 1.158333 | 0.154    | 0.117348235        | 11.73482 |
| <b>5d</b> | 1.051 | 1.271 | 1.252 | 1.191333 | 0.121    | 0.092202184        | 9.220218 |
| <b>5e</b> | 1.356 | 1.398 | 1.043 | 1.265667 | 0.046667 | 0.035560071        | 3.556007 |
| <b>5n</b> | 1.091 | 1.217 | 1.649 | 1.319    | -0.00667 | -0.00508001        | -0.508   |
| <b>5g</b> | 1.492 | 1.312 | 1.039 | 1.281    | 0.031333 | 0.023876048        | 2.387605 |
| <b>5f</b> | 0.712 | 0.815 | 1.037 | 0.854667 | 0.457667 | 0.348742697        | 34.87427 |
| <b>5h</b> | 0.925 | 0.982 | 1.038 | 0.981667 | 0.330667 | 0.251968504        | 25.19685 |
| <b>5i</b> | 1.07  | 1.21  | 1.043 | 1.107667 | 0.204667 | 0.155956312        | 15.59563 |
| <b>5j</b> | 1.31  | 1.289 | 1.042 | 1.213667 | 0.098667 | 0.07518415         | 7.518415 |
| <b>5k</b> | 1.201 | 1.412 | 1.043 | 1.218667 | 0.093667 | 0.071374143        | 7.137414 |
| <b>5l</b> | 1.31  | 0.981 | 1.039 | 1.11     | 0.202333 | 0.154178308        | 15.41783 |

### 3. EC<sub>50</sub> of compounds 5e, 5i and 5l

|   | 1     | 2     | 3     | 4     | 5     | 6     | 7     | 8     | 9     | 10    | 11    | 12    |
|---|-------|-------|-------|-------|-------|-------|-------|-------|-------|-------|-------|-------|
| A | 1.114 | 1.213 | 1.413 | 0.038 | 1.109 | 1.019 | 0.912 | 0.036 | 0.036 | 1.112 | 1.203 | 1.187 |
| B | 0.312 | 0.433 | 0.341 | 0.038 | 0.234 | 0.298 | 0.274 | 0.036 | 0.036 | 0.341 | 0.312 | 0.287 |
| C | 0.912 | 0.905 | 1.012 | 0.038 | 1.012 | 0.913 | 1.237 | 0.036 | 0.037 | 1.109 | 1.112 | 1.031 |
| D | 0.713 | 0.876 | 0.9   | 0.04  | 0.91  | 0.897 | 0.978 | 0.038 | 0.037 | 0.991 | 0.891 | 0.912 |
| E | 0.7   | 0.614 | 0.621 | 0.041 | 0.781 | 0.772 | 0.764 | 0.042 | 0.039 | 0.712 | 0.62  | 0.65  |
| F | 0.416 | 0.452 | 0.534 | 0.04  | 0.678 | 0.691 | 0.712 | 0.037 | 0.038 | 0.534 | 0.598 | 0.6   |
| G | 0.39  | 0.374 | 0.471 | 0.042 | 0.54  | 0.413 | 0.491 | 0.038 | 0.04  | 0.412 | 0.398 | 0.375 |
| H | 0.036 | 0.037 | 0.037 | 0.036 | 0.046 | 0.042 | 0.04  | 0.038 | 0.038 | 0.039 | 0.037 | 0.037 |

#### EC<sub>50</sub> of 5l

|      | O.D1  | O.D2  | O.D3  | AVG      | CTRL-TST | CTRL-TST *100 | stdev    |          |
|------|-------|-------|-------|----------|----------|---------------|----------|----------|
| ctrl | 1.114 | 1.213 | 1.413 | 1.246667 | 0        | 0             | 0        | 0.152317 |
| eto  | 0.312 | 0.433 | 0.341 | 0.362    | 0.884667 | 0.709626      | 70.96257 | 0.063174 |
| 10   | 0.912 | 0.905 | 1.012 | 0.943    | 0.303667 | 0.243583      | 24.35829 | 0.059858 |
| 20   | 0.713 | 0.876 | 0.9   | 0.829667 | 0.417    | 0.334492      | 33.4492  | 0.101746 |
| 30   | 0.7   | 0.614 | 0.621 | 0.645    | 0.601667 | 0.48262       | 48.26203 | 0.04776  |
| 40   | 0.416 | 0.452 | 0.534 | 0.467333 | 0.779333 | 0.625134      | 62.51337 | 0.060476 |
| 50   | 0.39  | 0.374 | 0.471 | 0.411667 | 0.835    | 0.669786      | 66.97861 | 0.052003 |

EC<sub>50</sub>=3.53 micromolar

#### EC<sub>50</sub> of 5e

|      | O.D1  | O.D2  | O.D3  | AVG      | CTRL-TST | CTRL-TST *100 | stdev    |          |
|------|-------|-------|-------|----------|----------|---------------|----------|----------|
| ctrl | 1.109 | 1.019 | 0.912 | 1.013333 | 0        | 0             | 0        | 0.098622 |
| eto  | 0.234 | 0.298 | 0.274 | 0.268667 | 0.744667 | 0.734868      | 73.48684 | 0.032332 |
| 10   | 1.012 | 0.913 | 1.237 | 1.054    | -0.04067 | -0.04013      | -4.01316 | 0.166033 |
| 20   | 0.91  | 0.897 | 0.978 | 0.928333 | 0.085    | 0.083882      | 8.388158 | 0.043501 |
| 30   | 0.781 | 0.772 | 0.764 | 0.772333 | 0.241    | 0.237829      | 23.78289 | 0.008505 |
| 40   | 0.678 | 0.691 | 0.712 | 0.693667 | 0.319667 | 0.315461      | 31.54605 | 0.017156 |
| 50   | 0.54  | 0.413 | 0.491 | 0.481333 | 0.532    | 0.525         | 52.5     | 0.064049 |

EC<sub>50</sub>=6 micromolar

#### EC<sub>50</sub> of 5i

|      | O.D1  | O.D2  | O.D3  | AVG      | CTRL-TST | CTRL-TST *100 | stdev    |          |
|------|-------|-------|-------|----------|----------|---------------|----------|----------|
| ctrl | 1.112 | 1.203 | 1.187 | 1.167333 | 0        | 0             | 0        | 0.048583 |
| eto  | 0.341 | 0.312 | 0.287 | 0.313333 | 0.854    | 0.731582      | 73.1582  | 0.027025 |
| 10   | 1.109 | 1.112 | 1.031 | 1.084    | 0.083333 | 0.071388      | 7.138778 | 0.045924 |
| 20   | 0.991 | 0.891 | 0.912 | 0.931333 | 0.236    | 0.20217       | 20.21702 | 0.052729 |
| 30   | 0.712 | 0.62  | 0.65  | 0.660667 | 0.506667 | 0.434038      | 43.40377 | 0.046918 |
| 40   | 0.534 | 0.598 | 0.6   | 0.577333 | 0.59     | 0.505425      | 50.54255 | 0.037541 |
| 50   | 0.412 | 0.398 | 0.375 | 0.395    | 0.772333 | 0.661622      | 66.16219 | 0.018682 |

EC<sub>50</sub>=4.01 micromolar

4. DNA ladder assay of compounds, 5e, 5i and 5l (Figure 1):

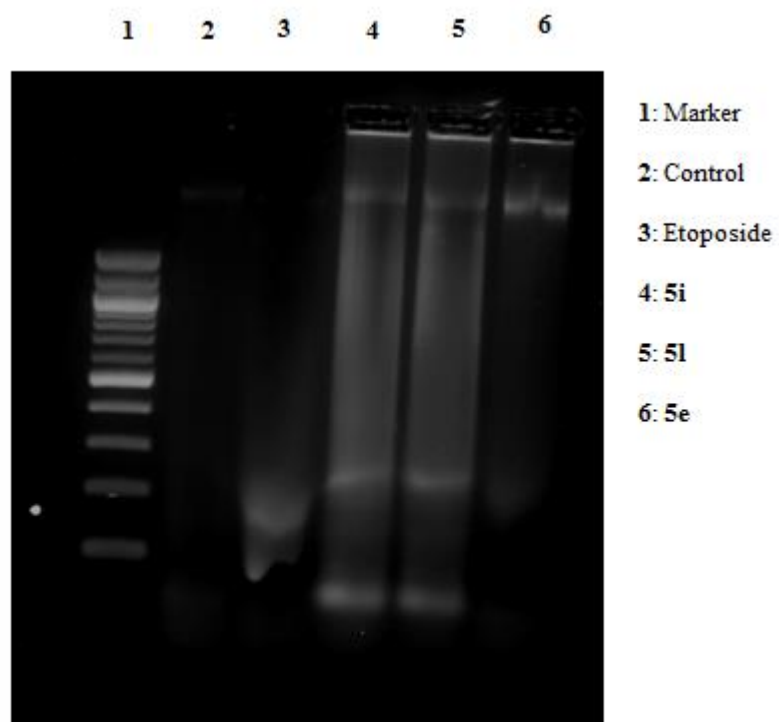

5. **Table 1. Various interactions between 5l and the target protein with the amino acid involve in the binding and the distances between the binding atoms.**

| <b>Interaction Type</b> | <b>Residue</b> | <b>Amino Acid</b> | <b>Distance (Å)</b> |
|-------------------------|----------------|-------------------|---------------------|
| Hydrogen Bond           | 183            | HIS               | 2.23                |
| Hydrophobic Interaction | 155            | PHE               | 3.21                |
| Hydrophobic Interaction | 155            | PHE               | 3.98                |
| Hydrophobic Interaction | 210            | PHE               | 3.43                |
| Hydrophobic Interaction | 210            | PHE               | 3.30                |
| Hydrophobic Interaction | 210            | PHE               | 3.67                |
| Hydrophobic Interaction | 276            | LEU               | 3.60                |
| Pi-Stacking             | 209            | TYR               | 6.70                |
| Pi-Stacking             | 209            | TYR               | 6.20                |

**6. Annexin-PI FACS experiments:**

**Quadrants Q1: Necrosis (Ann -ve/PI +ve); Q2: Late apoptosis (Ann +ve/ PI +ve);**

**Q3: Ann -ve/ PI -ve; Q4: Early Apoptosis (Ann +ve/ PI -ve).**

**a. Figure 2 (Unstained)**

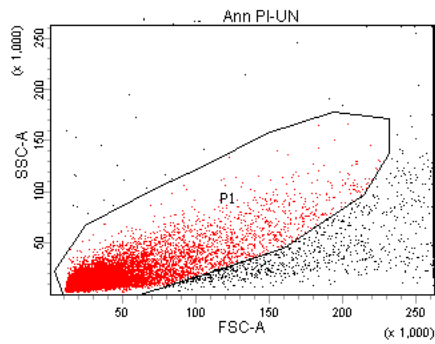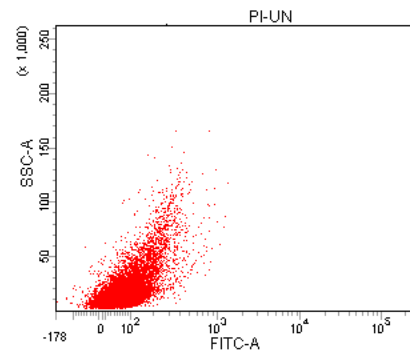

Experiment Name: Experiment\_046  
 Specimen Name: Ann PI (Unstained)  
 Tube Name: UN  
 Record Date: Apr 22, 2016 4:35:19 PM  
 Operator: Administrator  
 GUID: 835abdb8-5a99-44ea-a200-b3...

| Population | #Events | %Parent | SSC-A Mean | FITC-A Mean |
|------------|---------|---------|------------|-------------|
| ■ P1       | 13,010  | 65.1    | 16,687     | 71          |
| ☒ Q1       | 0       | 0.0     | ###        | ###         |
| ☒ Q2       | 0       | 0.0     | ###        | ###         |
| ☒ Q3       | 13,010  | 100.0   | 16,687     | 71          |
| ☒ Q4       | 0       | 0.0     | ###        | ###         |
| ☒ P2       | 4       | 0.0     | 85,352     | 1,194       |
| ☒ P3       | 0       | 0.0     | ###        | ###         |

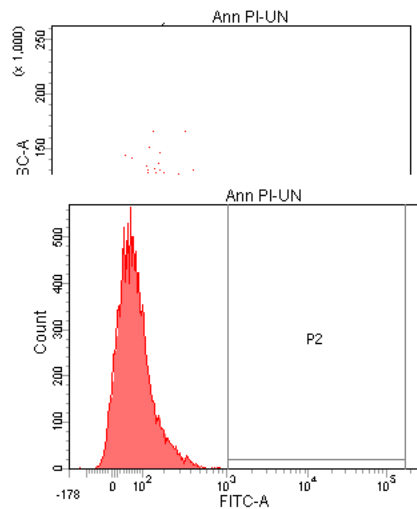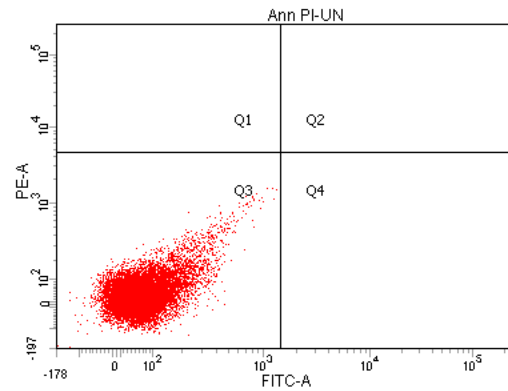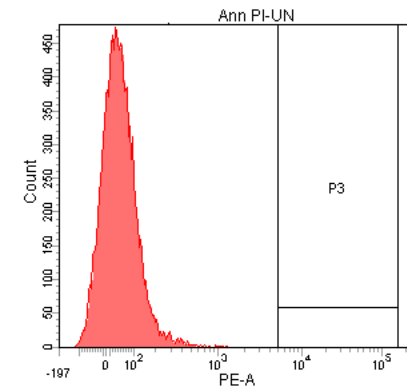

**b. Figure 3 (control @ 6h)**

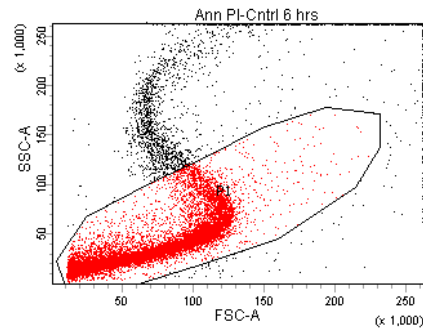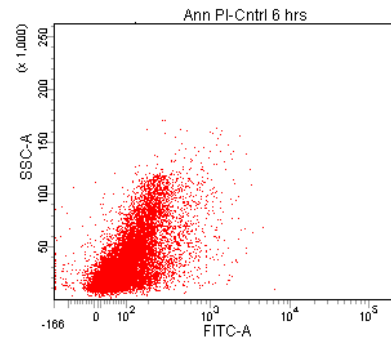

Experiment Name: Experiment\_046  
 Specimen Name: Ann PI  
 Tube Name: Cntrl 6 hrs  
 Record Date: Apr 22, 2016 4:37:07 PM  
 Operator: Administrator  
 GUID: 25d43a36-0ade-4fd0-9ab8-95c...

| Population                             | #Events | %Parent | SSC-A Mean | FITC-A Mean |
|----------------------------------------|---------|---------|------------|-------------|
| <input checked="" type="checkbox"/> P1 | 14,871  | 74.4    | 34,965     | 118         |
| <input checked="" type="checkbox"/> Q1 | 812     | 5.5     | 40,746     | 296         |
| <input checked="" type="checkbox"/> Q2 | 16      | 0.1     | 96,267     | 2,109       |
| <input checked="" type="checkbox"/> Q3 | 14,021  | 94.3    | 34,520     | 102         |
| <input checked="" type="checkbox"/> Q4 | 22      | 0.1     | 61,239     | 2,289       |
| <input checked="" type="checkbox"/> P2 | 85      | 0.6     | 79,945     | 1,648       |
| <input checked="" type="checkbox"/> P3 | 763     | 5.1     | 42,853     | 335         |

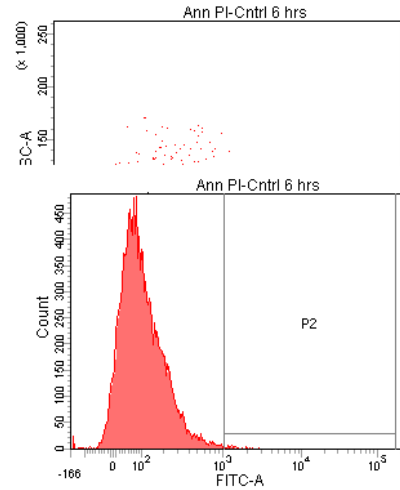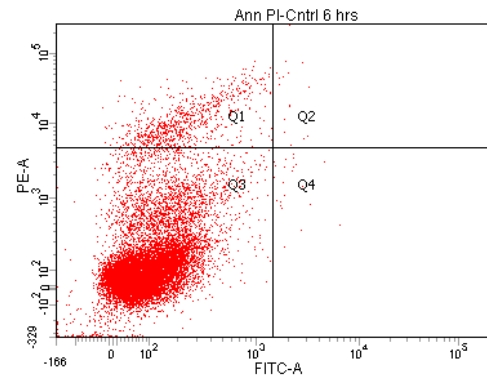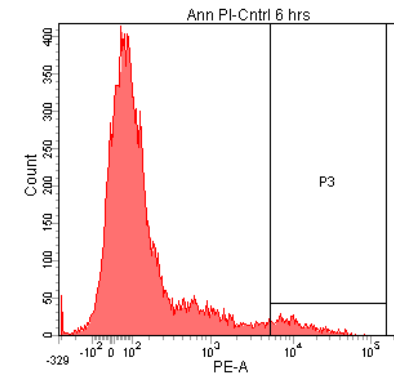

c. Figure 4 (control @ 12h)

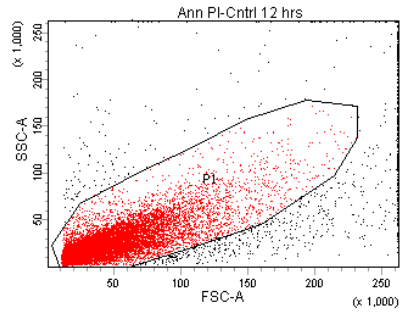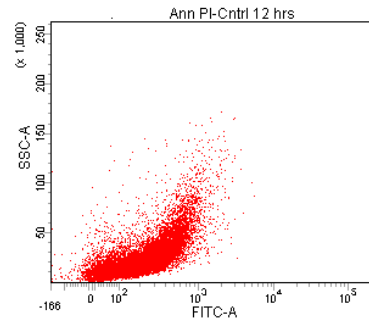

Experiment Name: Experiment\_046  
 Specimen Name: Ann PI  
 Tube Name: Cntrl 12 hrs  
 Record Date: Apr 22, 2016 4:42:03 PM  
 Operator: Administrator  
 GUID: 9816438c-e990-49f1-9fc4-5847...

| Population                             | #Events | %Parent | SSC-A Mean | FITC-A Mean |
|----------------------------------------|---------|---------|------------|-------------|
| <input checked="" type="checkbox"/> P1 | 16,717  | 83.6    | 23,805     | 268         |
| <input checked="" type="checkbox"/> Q1 | 798     | 4.8     | 45,297     | 460         |
| <input checked="" type="checkbox"/> Q2 | 58      | 0.3     | 96,746     | 2,188       |
| <input checked="" type="checkbox"/> Q3 | 15,818  | 94.6    | 22,276     | 247         |
| <input checked="" type="checkbox"/> Q4 | 43      | 0.3     | 89,071     | 1,852       |
| <input checked="" type="checkbox"/> P2 | 234     | 1.4     | 85,133     | 1,560       |
| <input checked="" type="checkbox"/> P3 | 744     | 4.5     | 50,772     | 592         |

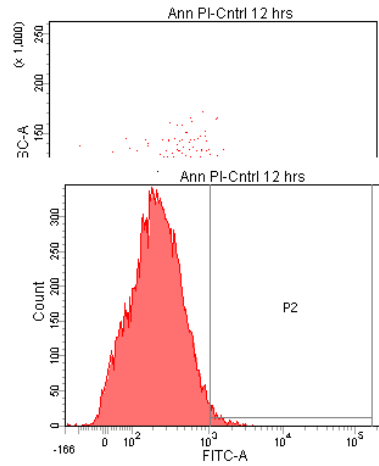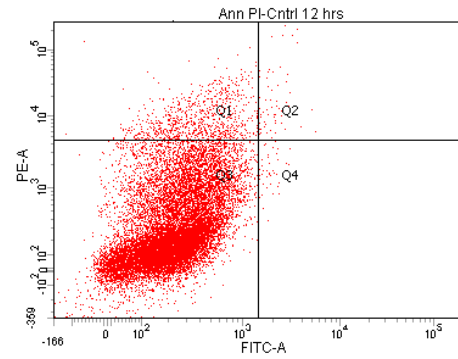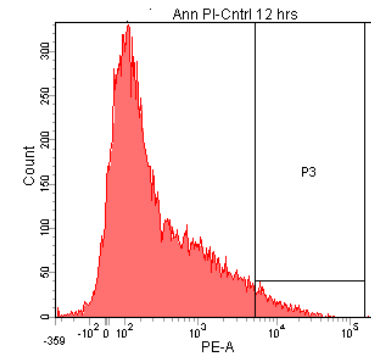

**d. Figure 5 (control @ 24h)**

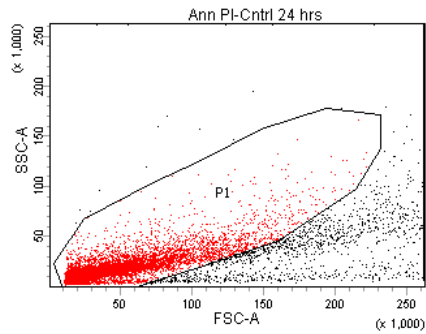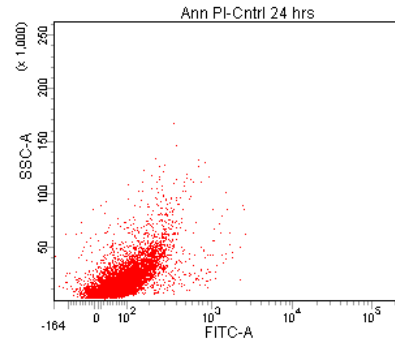

Experiment Name: Experiment\_046  
 Specimen Name: Ann PI  
 Tube Name: Cntrl 24 hrs  
 Record Date: Apr 22, 2016 4:47:34 PM  
 Operator: Administrator  
 GUID: 14116eb37-625d-4bf5-ac6e-015...

| Population | #Events | %Parent | SSC-A Mean | FITC-A Mean |
|------------|---------|---------|------------|-------------|
| ■ P1       | 8,769   | 43.8    | 17,359     | 87          |
| ☒ Q1       | 1,451   | 16.5    | 35,531     | 138         |
| ☒ Q2       | 7       | 0.1     | 57,741     | 1,867       |
| ☒ Q3       | 7,303   | 83.3    | 13,661     | 74          |
| ☒ Q4       | 8       | 0.1     | 61,649     | 1,809       |
| ☒ P2       | 25      | 0.3     | 55,521     | 1,577       |
| ☒ P3       | 1,221   | 13.9    | 36,083     | 133         |

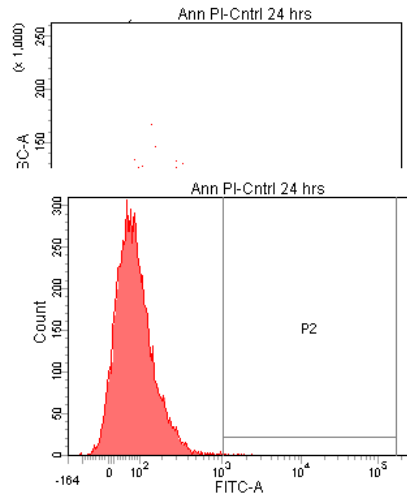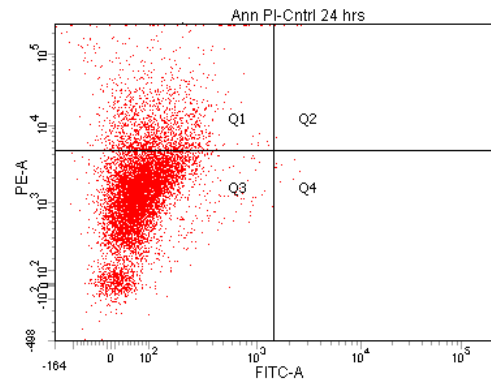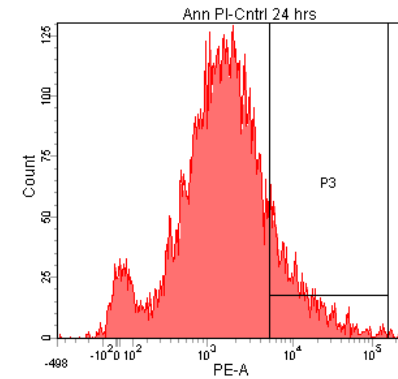



e. Figure 6 (Etoposide @ 6h)

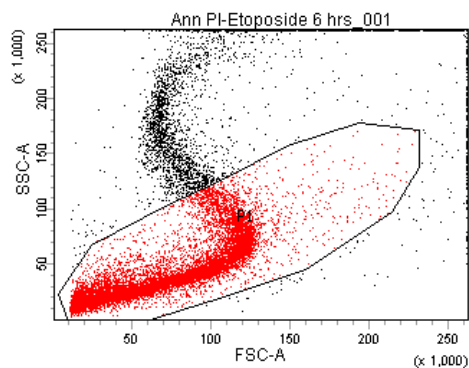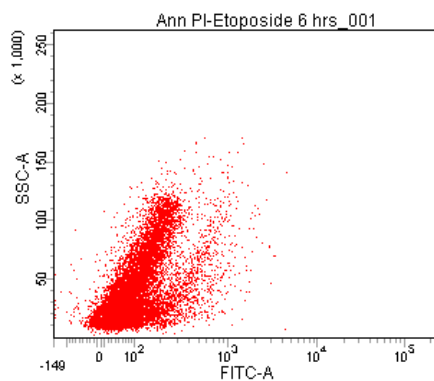

Experiment Name: Experiment\_046  
 Specimen Name: Ann PI  
 Tube Name: Etoposide 6 hrs\_001  
 Record Date: Apr 22, 2016 4:39:01 PM  
 Operator: Administrator  
 GUID: 36cb3c5f-267e-4866-ad87-c59...

| Population                             | #Events | %Parent | SSC-A Mean | FITC-A Mean |
|----------------------------------------|---------|---------|------------|-------------|
| <input checked="" type="checkbox"/> P1 | 14,043  | 70.2    | 39,121     | 116         |
| <input checked="" type="checkbox"/> Q1 | 957     | 6.8     | 45,349     | 311         |
| <input checked="" type="checkbox"/> Q2 | 19      | 0.1     | 86,915     | 2,222       |
| <input checked="" type="checkbox"/> Q3 | 13,056  | 93.0    | 38,563     | 96          |
| <input checked="" type="checkbox"/> Q4 | 11      | 0.1     | 77,919     | 2,126       |
| <input checked="" type="checkbox"/> P2 | 60      | 0.4     | 85,686     | 1,689       |
| <input checked="" type="checkbox"/> P3 | 833     | 5.9     | 48,986     | 375         |

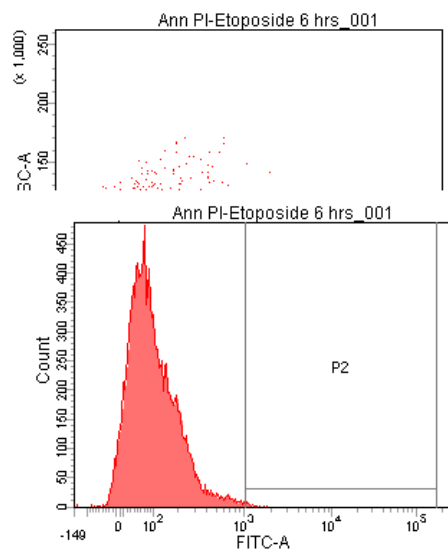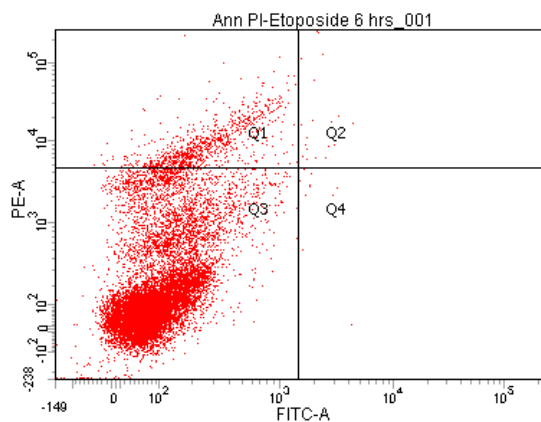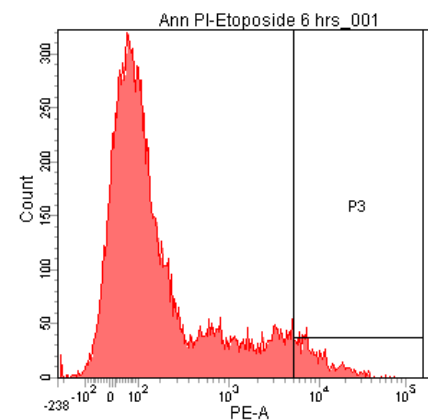

f. Figure 7 (Etoposide @ 12h)

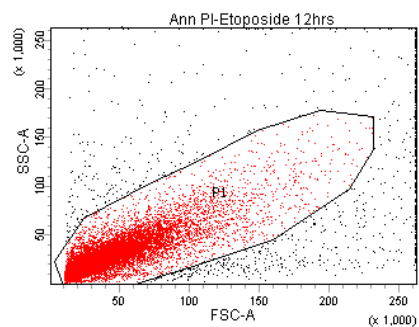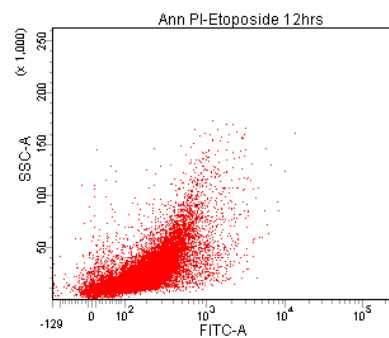

Experiment Name: Experiment\_046  
 Specimen Name: Ann PI  
 Tube Name: Etoposide 12hrs  
 Record Date: Apr 22, 2016 4:43:28 PM  
 Operator: Administrator  
 GUID: 329d8d82-649c-42f5-8814-9dc...

| Population | #Events | %Parent | SSC-A Mean | FITC-A Mean |
|------------|---------|---------|------------|-------------|
| ■ P1       | 16,597  | 83.0    | 27,003     | 249         |
| ☒ Q1       | 853     | 5.1     | 47,501     | 496         |
| ☒ Q2       | 92      | 0.6     | 90,366     | 2,469       |
| ☒ Q3       | 15,561  | 93.8    | 25,283     | 210         |
| ☒ Q4       | 91      | 0.5     | 64,919     | 2,455       |
| ☒ P2       | 332     | 2.0     | 73,147     | 1,899       |
| ☒ P3       | 776     | 4.7     | 52,909     | 733         |

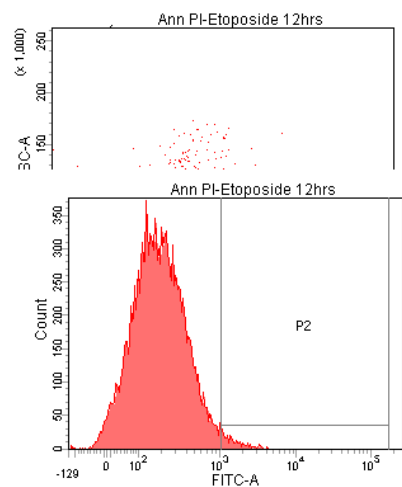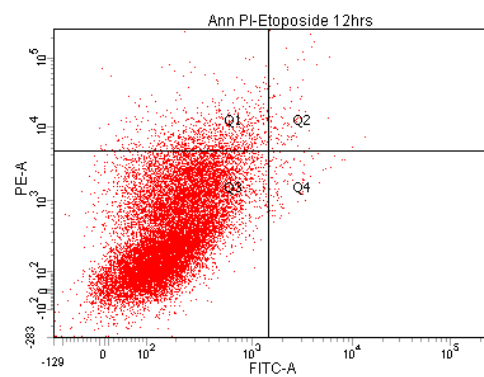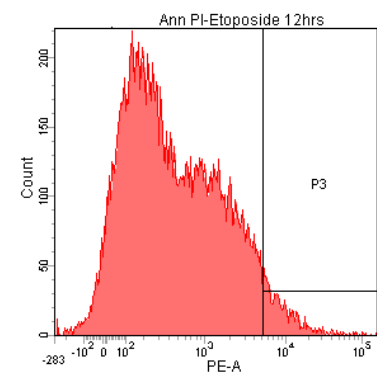

**g. Figure 8 (Etoposide @ 24h)**

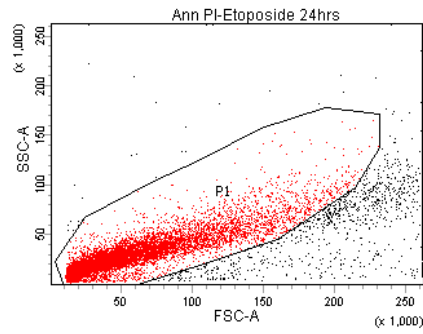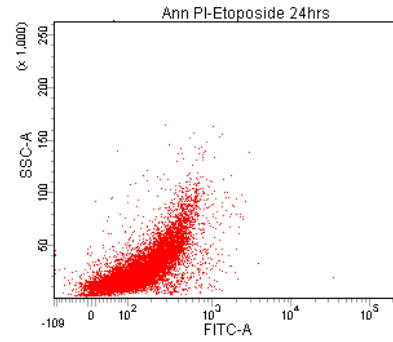

Experiment Name: Experiment\_046  
 Specimen Name: Ann PI  
 Tube Name: Etoposide 24hrs  
 Record Date: Apr 22, 2016 4:49:51 PM  
 Operator: Administrator  
 GUID: 636aaedb-7c4d-433b-ba9f-0bc...

| Population                             | #Events | %Parent | SSC-A Mean | FITC-A Mean |
|----------------------------------------|---------|---------|------------|-------------|
| <input checked="" type="checkbox"/> P1 | 12,613  | 63.1    | 25,875     | 175         |
| <input checked="" type="checkbox"/> Q1 | 1,083   | 8.6     | 59,358     | 335         |
| <input checked="" type="checkbox"/> Q2 | 10      | 0.1     | 89,530     | 1,932       |
| <input checked="" type="checkbox"/> Q3 | 11,500  | 91.2    | 22,608     | 152         |
| <input checked="" type="checkbox"/> Q4 | 20      | 0.2     | 59,158     | 3,663       |
| <input checked="" type="checkbox"/> P2 | 67      | 0.5     | 63,521     | 2,049       |
| <input checked="" type="checkbox"/> P3 | 787     | 6.2     | 58,871     | 340         |

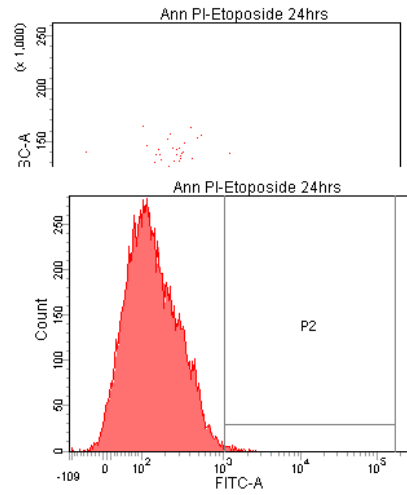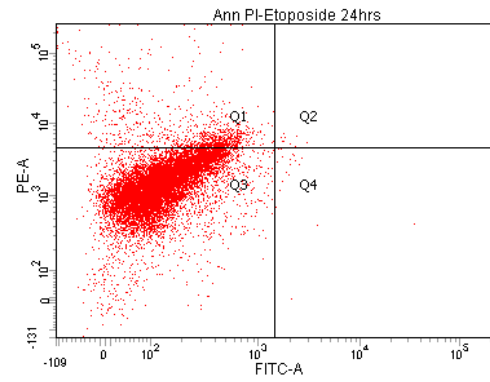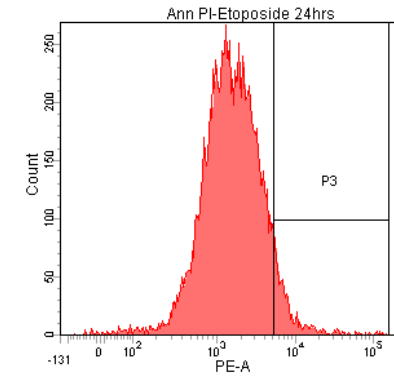

## h. Figure 9 (Compound 51 @ 6h)

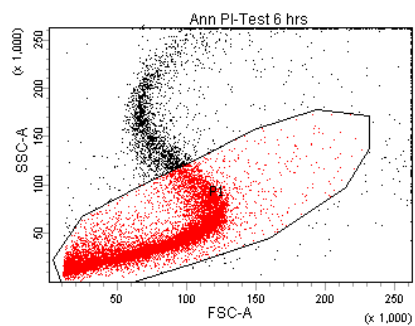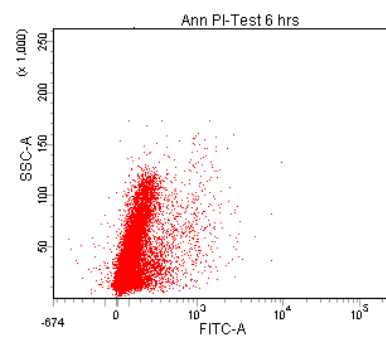

Experiment Name: Experiment\_046  
 Specimen Name: Ann PI  
 Tube Name: 51 @ 6 hrs  
 Record Date: Apr 22, 2016 4:40:52 PM  
 Operator: Administrator  
 GUID: 24413011-f7bd-44bd-be93-87e...

| Population | #Events | %Parent | SSC-A Mean | FITC-A Mean |
|------------|---------|---------|------------|-------------|
| P1         | 14,763  | 73.8    | 39,729     | 155         |
| Q1         | 740     | 5.0     | 37,427     | 326         |
| Q2         | 32      | 0.2     | 77,624     | 10,835      |
| Q3         | 13,966  | 94.6    | 39,697     | 118         |
| Q4         | 25      | 0.2     | 77,252     | 1,787       |
| P2         | 127     | 0.9     | 77,530     | 1,693       |
| P3         | 705     | 4.8     | 39,810     | 781         |

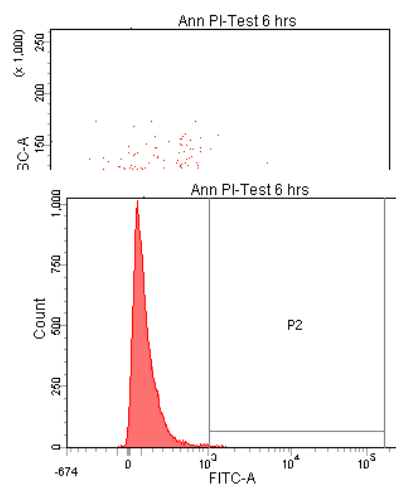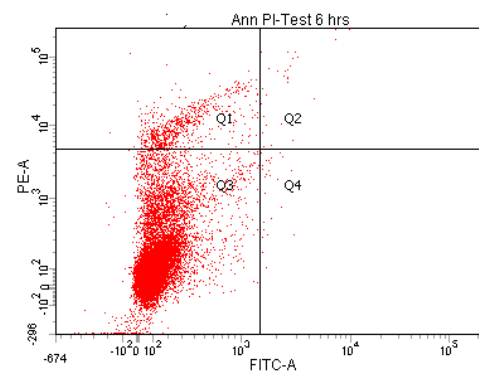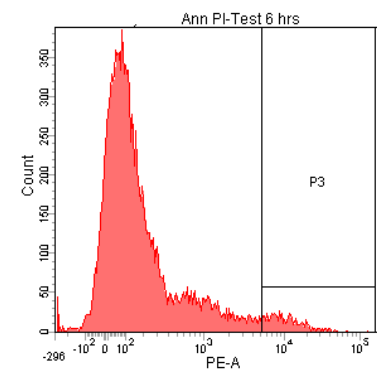

**i. Figure 10 (Compound 5l @ 12h)**

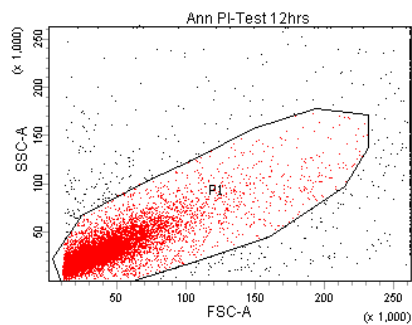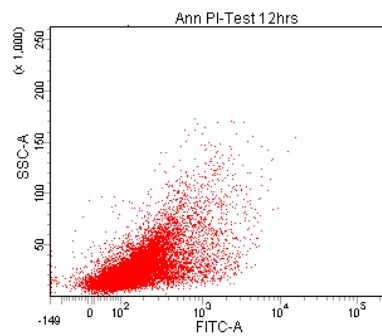

Experiment Name: Experiment\_046  
 Specimen Name: Ann PI  
 Tube Name: 5l @12hrs  
 Record Date: Apr 22, 2016 4:45:26 PM  
 Operator: Administrator  
 GUID: e35cd0d6-b249-40e8-a69b-9ee...

| Population | #Events | %Parent | SSC-A Mean | FITC-A Mean |
|------------|---------|---------|------------|-------------|
| P1         | 16,634  | 83.2    | 25,108     | 231         |
| Q1         | 1,476   | 8.9     | 40,651     | 419         |
| Q2         | 128     | 0.8     | 95,647     | 2,649       |
| Q3         | 14,835  | 89.2    | 22,623     | 162         |
| Q4         | 195     | 1.2     | 50,198     | 2,506       |
| P2         | 541     | 3.3     | 64,004     | 2,015       |
| P3         | 1,476   | 8.9     | 45,637     | 591         |

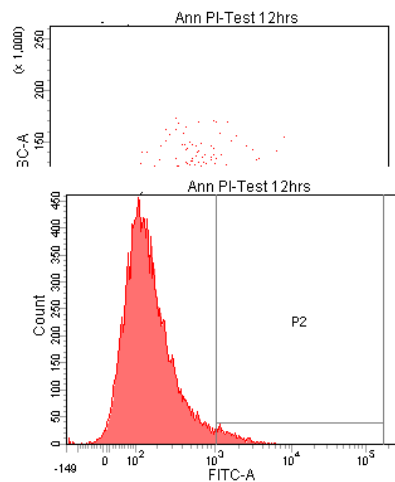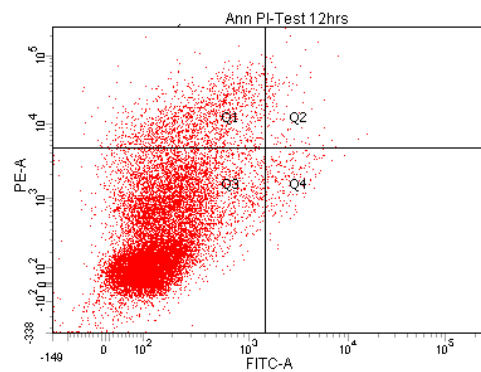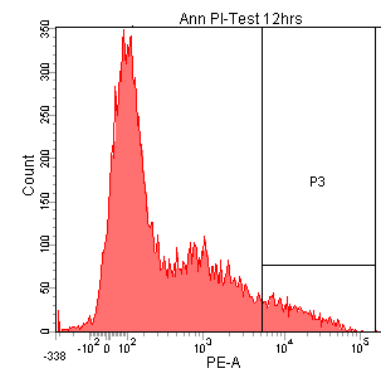

**j. Figure 11 (Compound 5l @ 24h)**

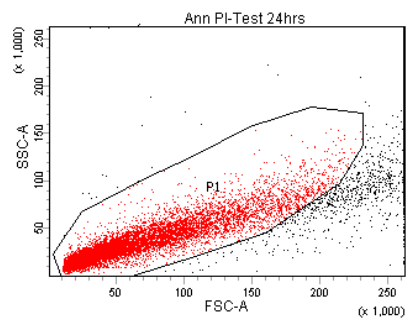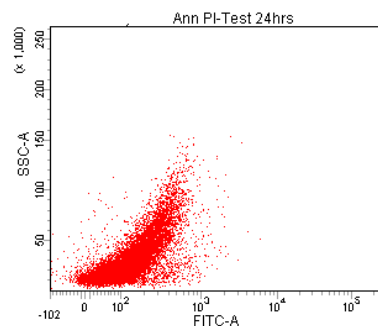

Experiment Name: Experiment\_046  
 Specimen Name: Ann PI  
 Tube Name: 5l @ 24hrs  
 Record Date: Apr 22, 2016 4:51:11 PM  
 Operator: Administrator  
 GUID: a56054bd-495f-4cd5-b44e-62f1...

| Population                             | #Events | %Parent | SSC-A Mean | FITC-A Mean |
|----------------------------------------|---------|---------|------------|-------------|
| <input checked="" type="checkbox"/> P1 | 11,888  | 59.4    | 31,010     | 169         |
| <input checked="" type="checkbox"/> Q1 | 2,955   | 24.9    | 57,842     | 293         |
| <input checked="" type="checkbox"/> Q2 | 12      | 0.1     | 98,340     | 1,977       |
| <input checked="" type="checkbox"/> Q3 | 8,906   | 74.9    | 21,974     | 122         |
| <input checked="" type="checkbox"/> Q4 | 15      | 0.1     | 55,879     | 2,293       |
| <input checked="" type="checkbox"/> P2 | 53      | 0.4     | 86,510     | 1,677       |
| <input checked="" type="checkbox"/> P3 | 2,453   | 20.6    | 61,288     | 316         |

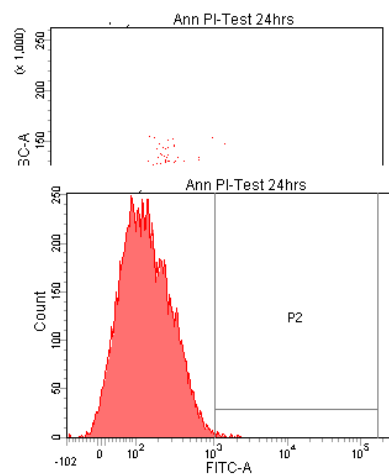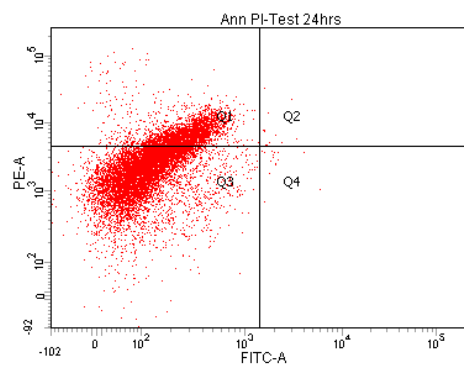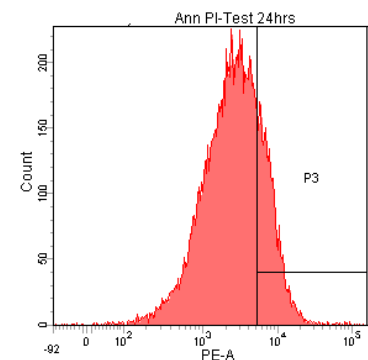

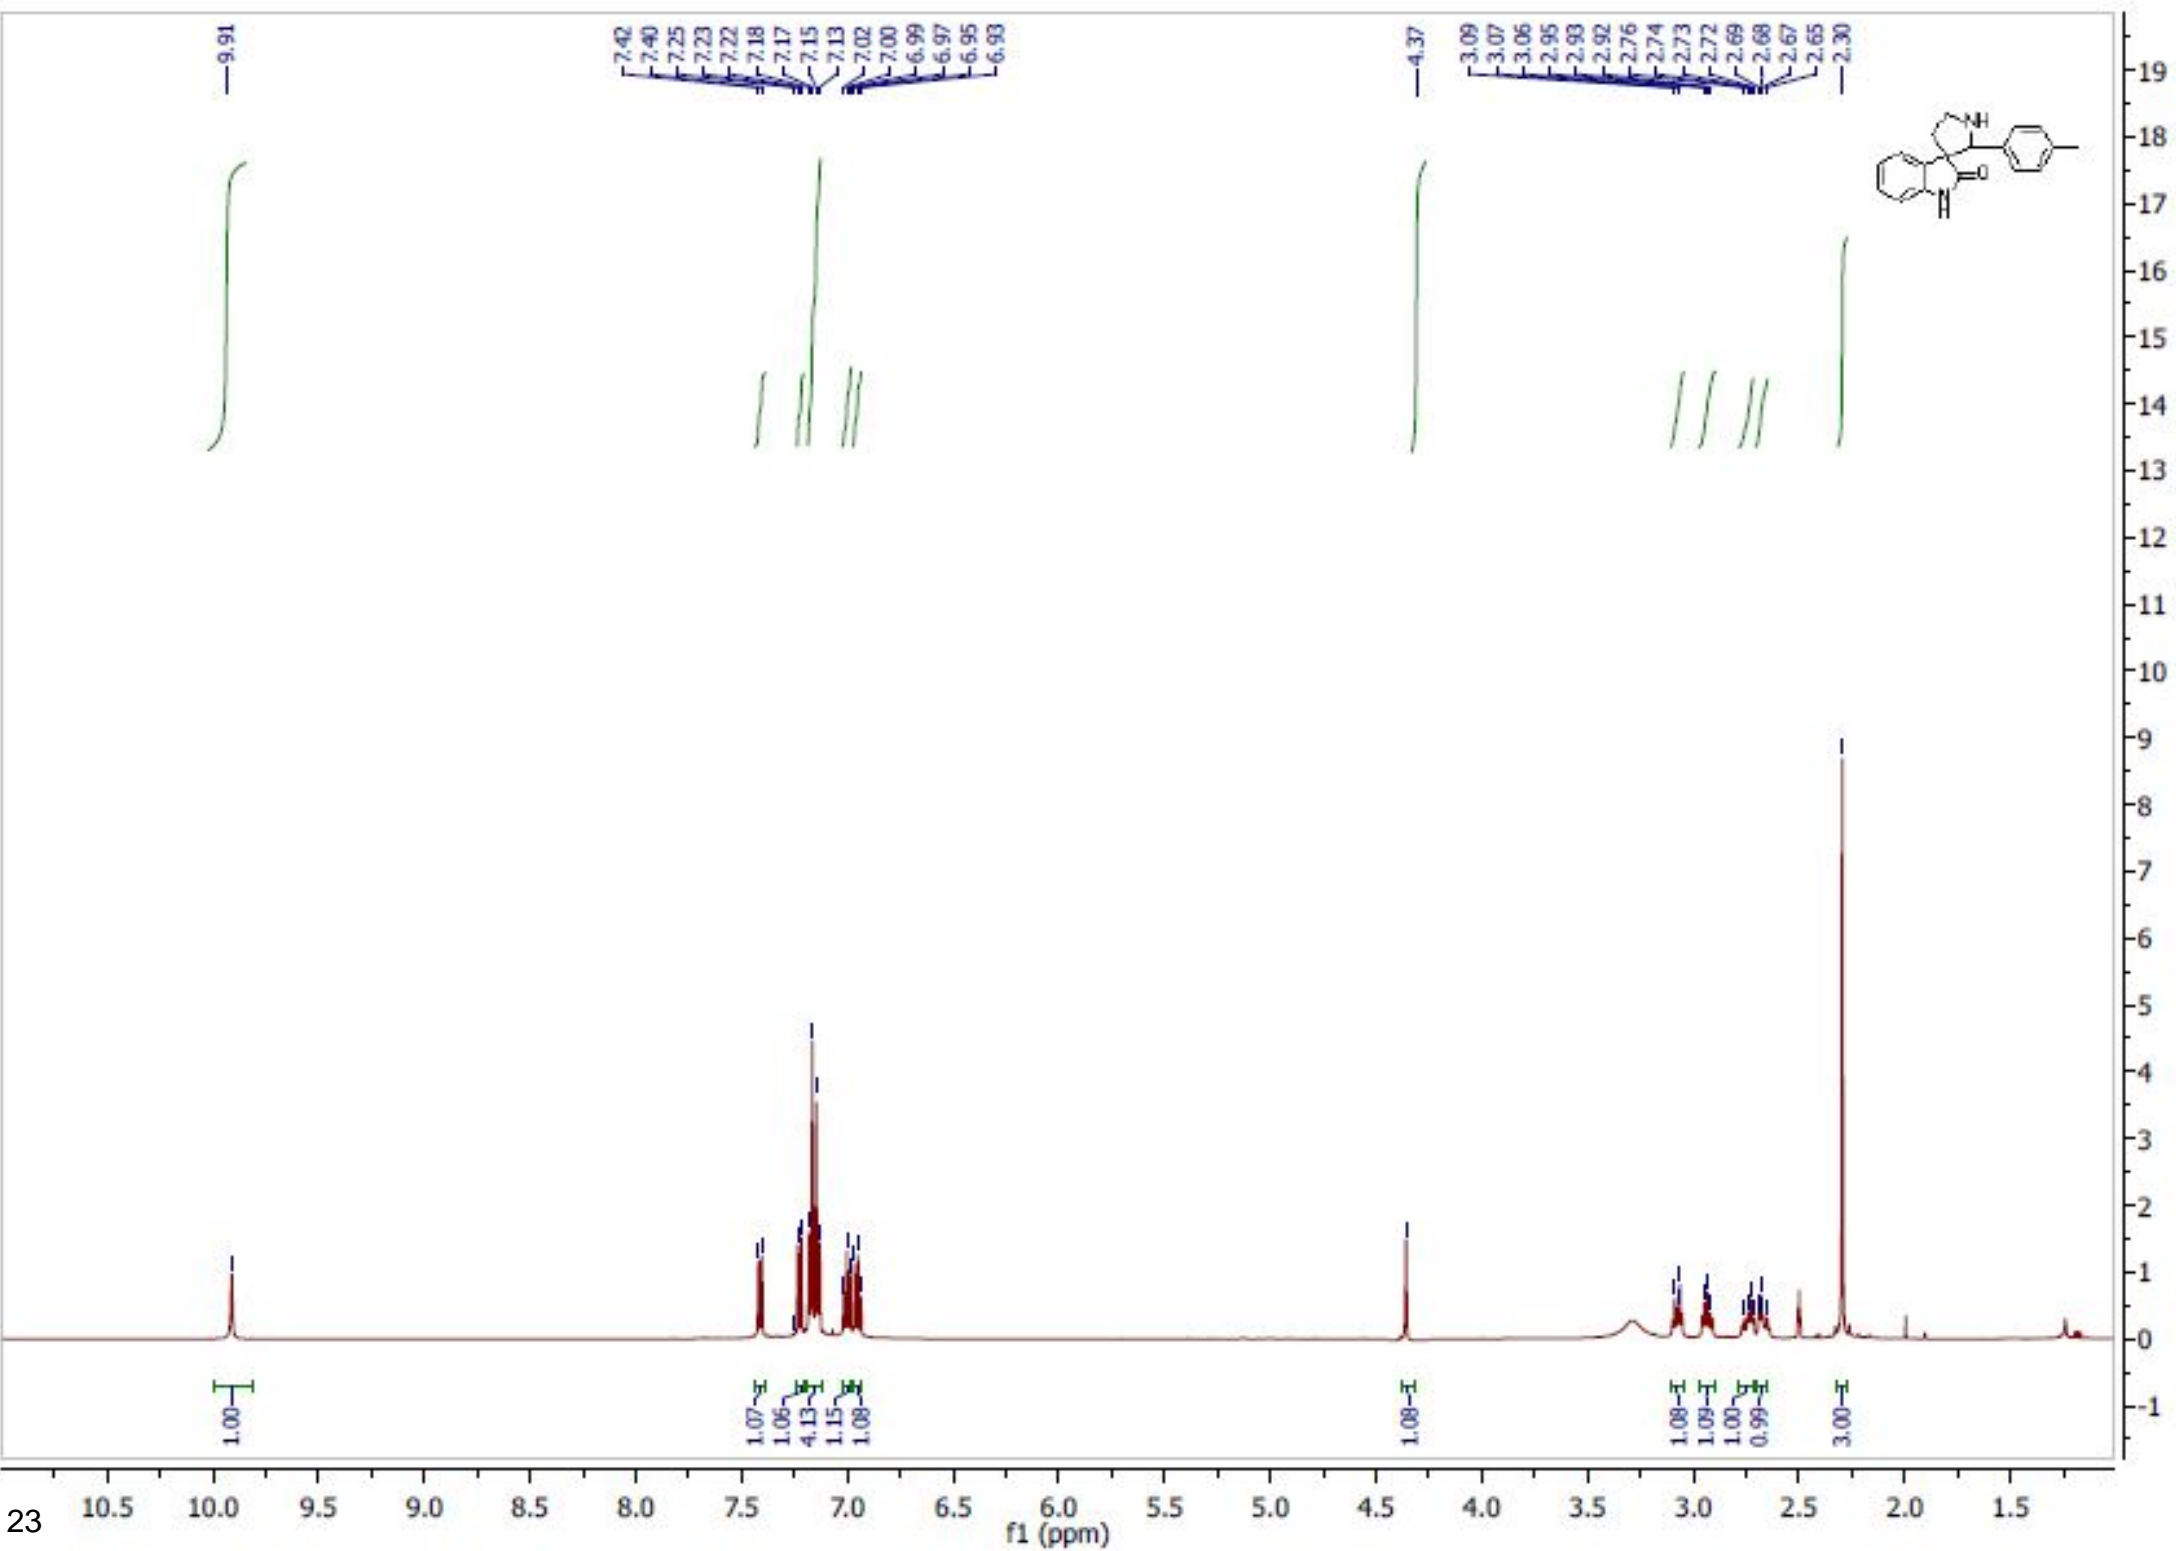

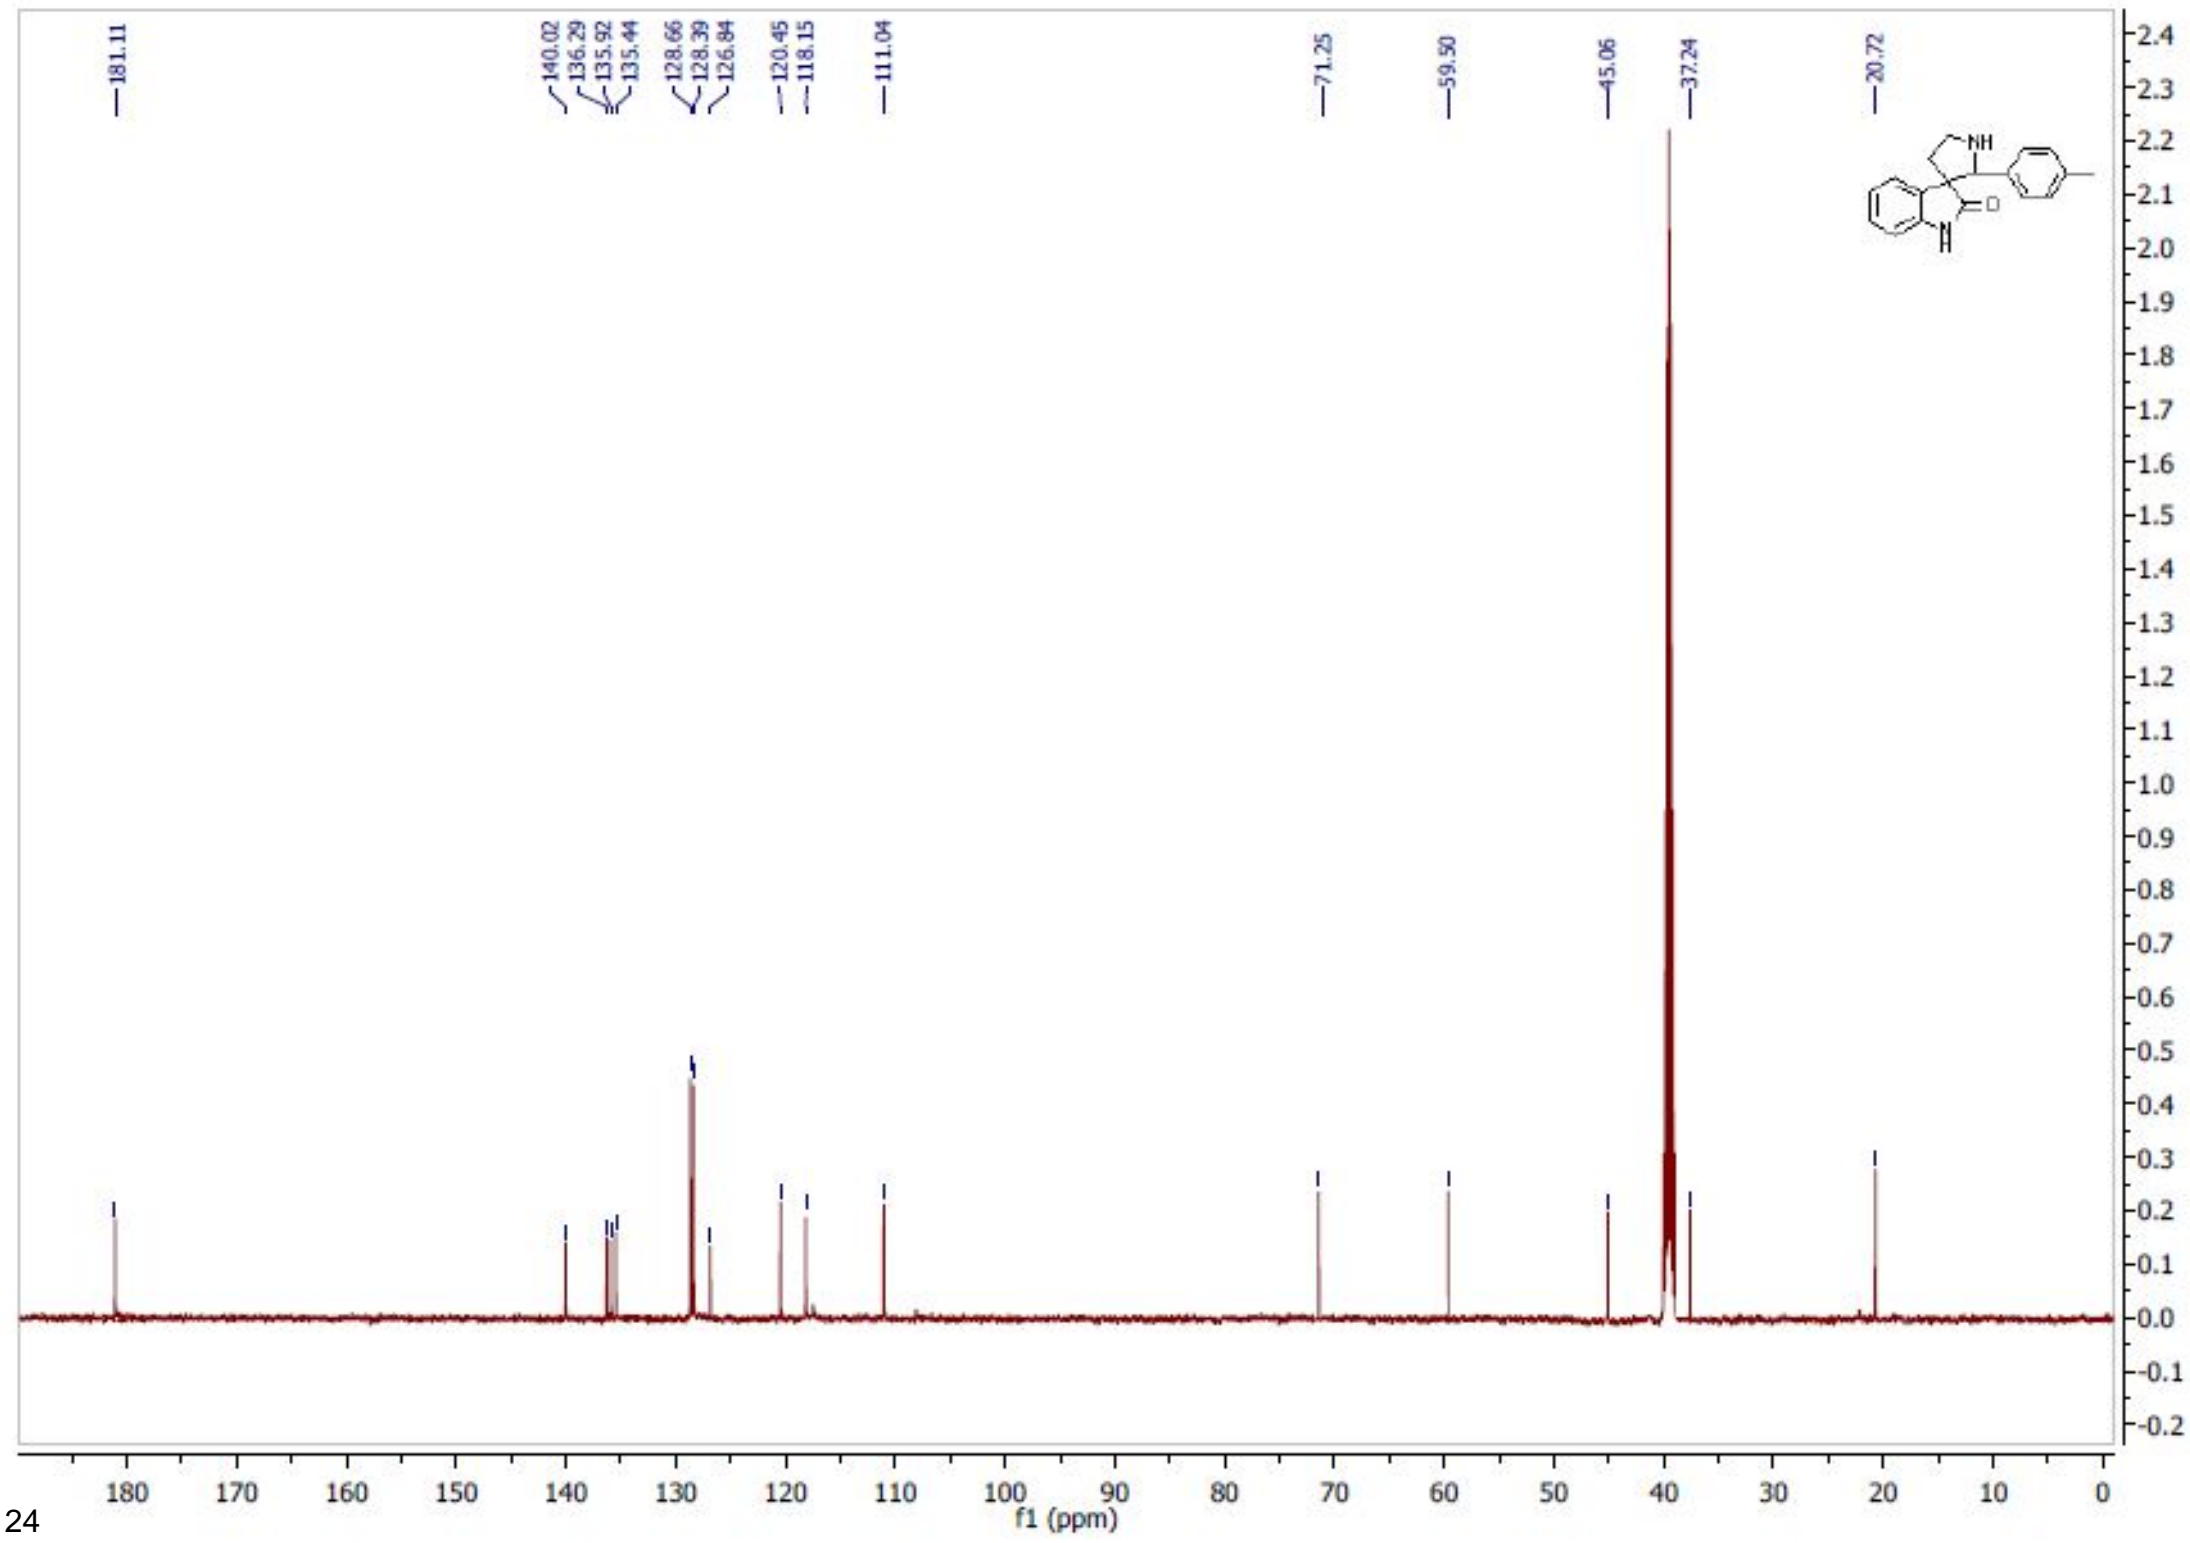



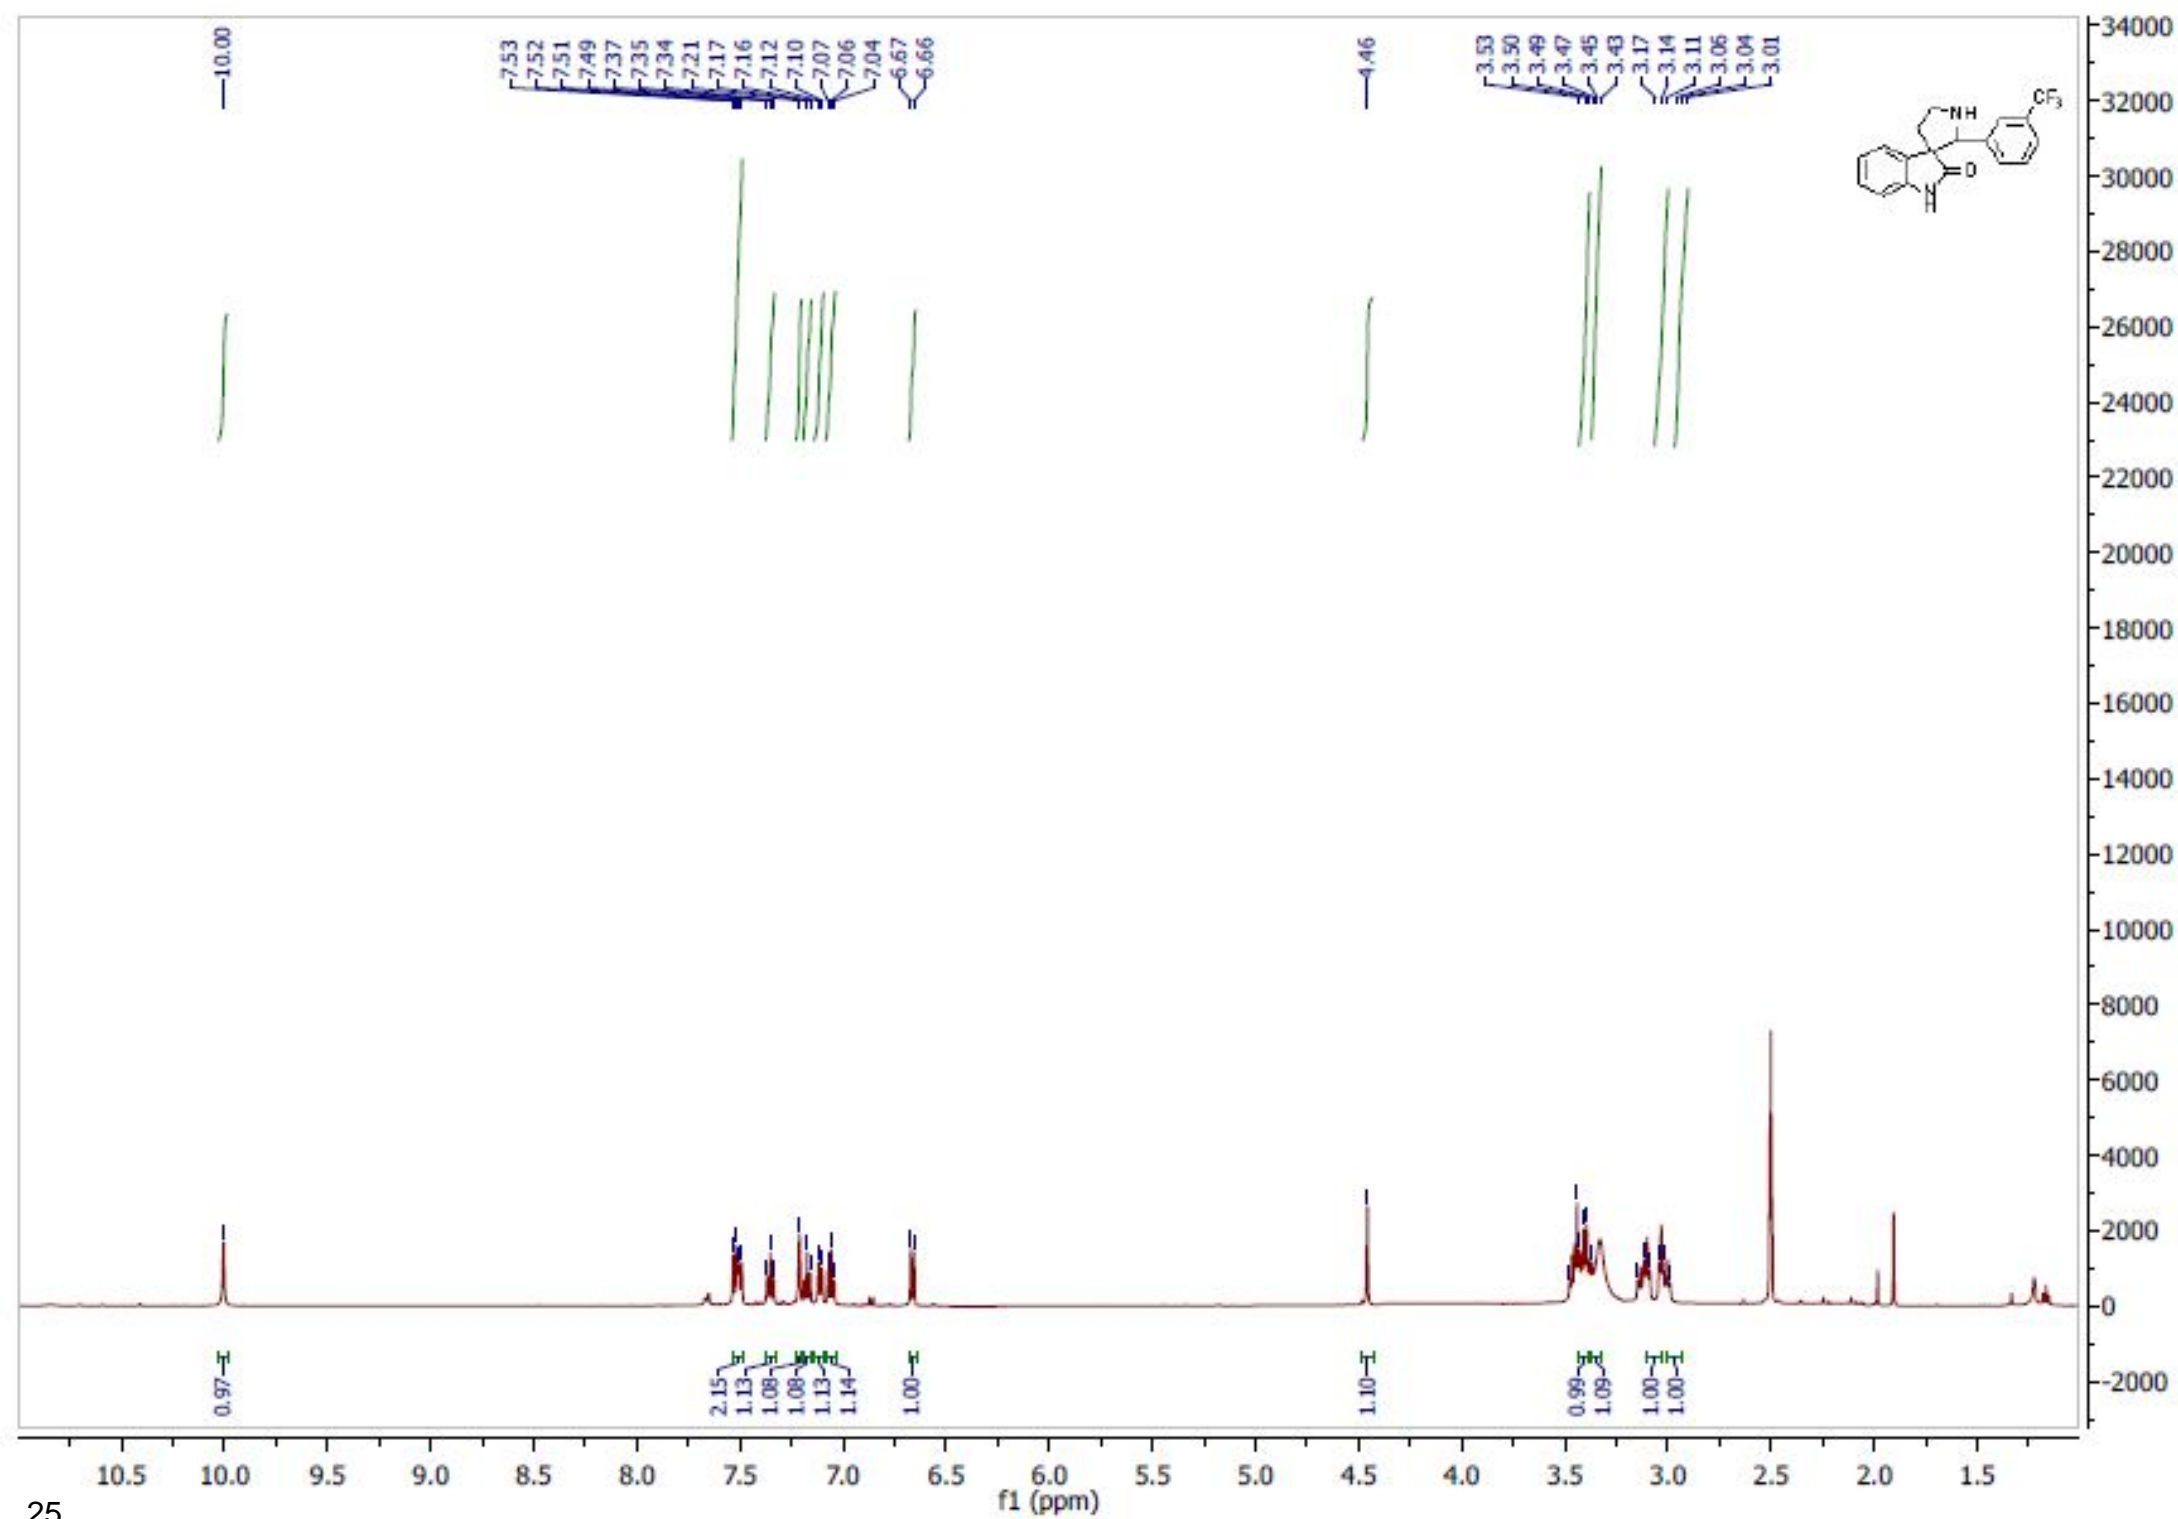

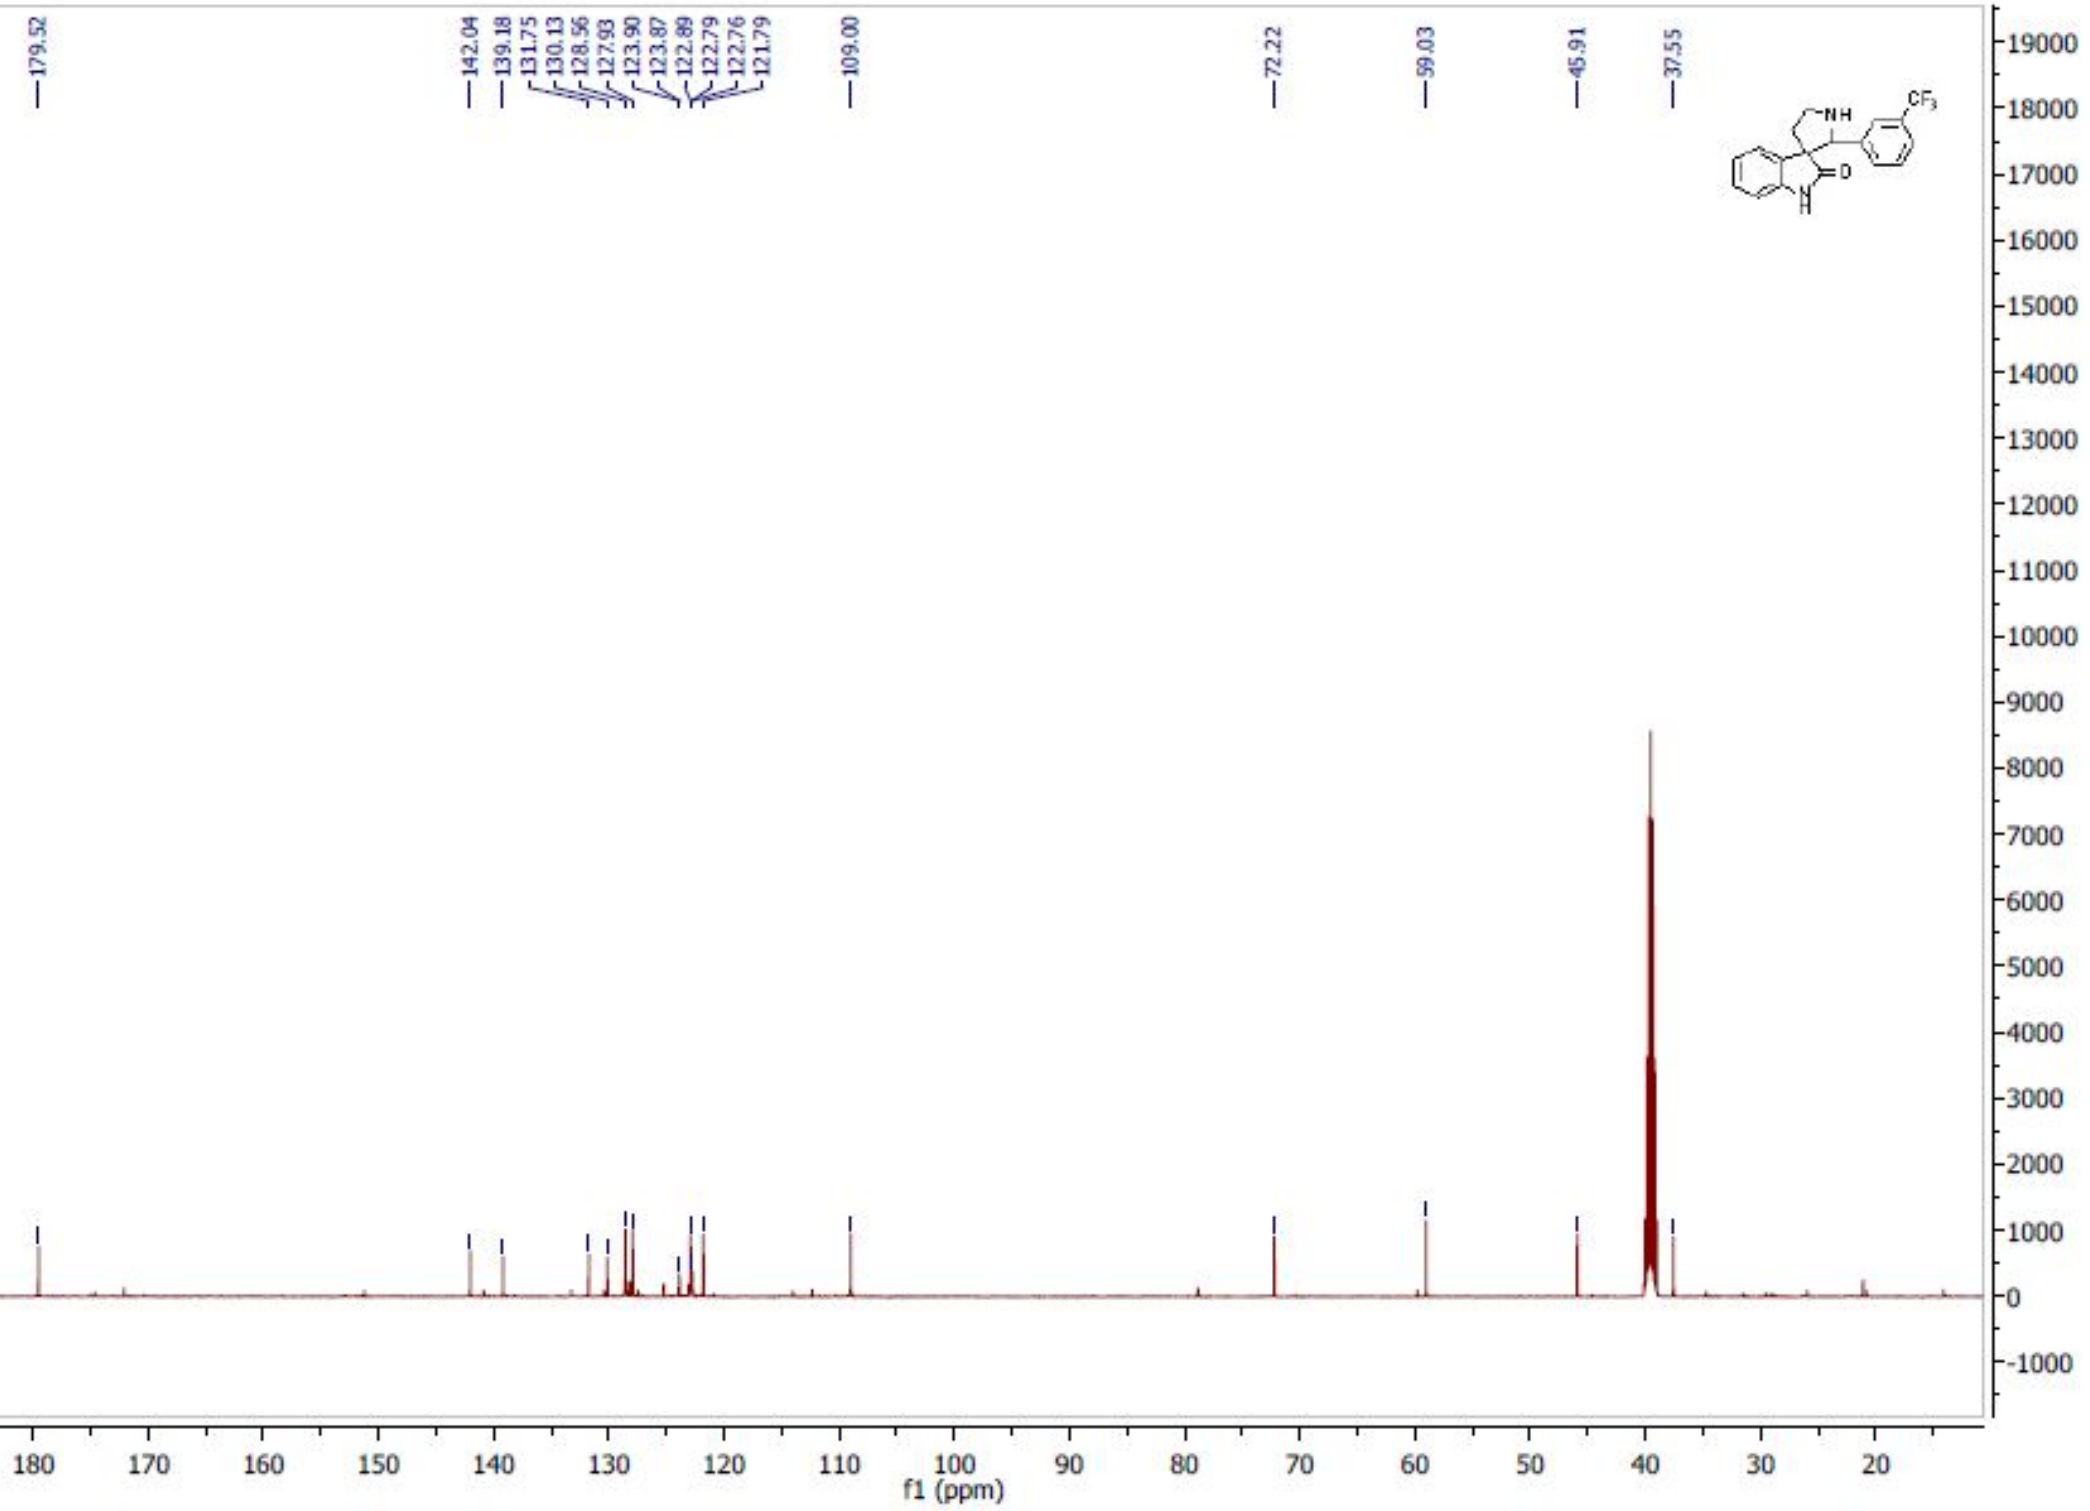

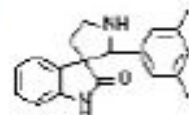

9.98  
7.55  
7.53  
7.32  
7.31  
7.14  
7.13  
7.11  
7.07  
7.05  
7.04  
7.02

4.24  
3.49  
3.47  
3.46  
3.45  
3.44  
3.42  
3.41  
3.15  
3.13  
3.11  
3.04  
3.03  
3.02  
2.98

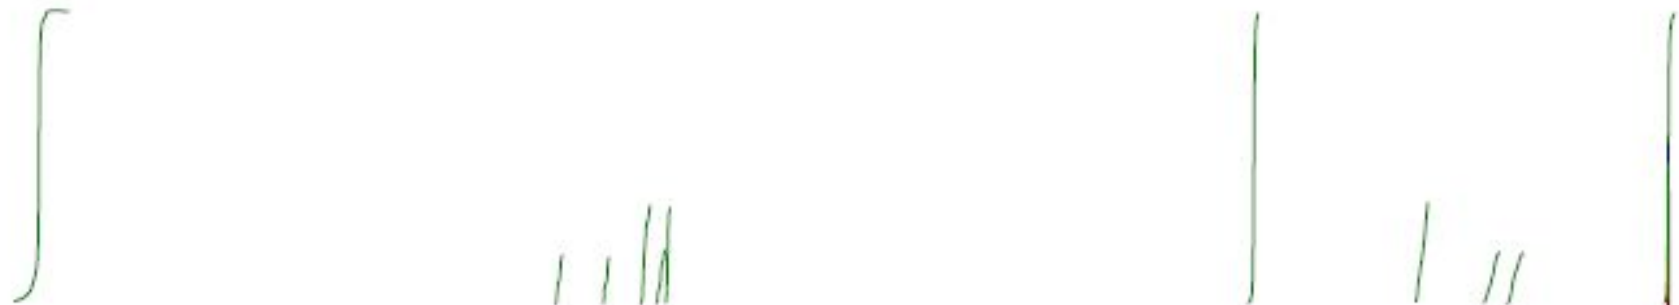

1.10

1.00  
0.95  
2.02  
1.11  
1.97

1.00

2.08  
1.06  
1.05

5.96

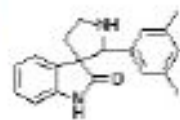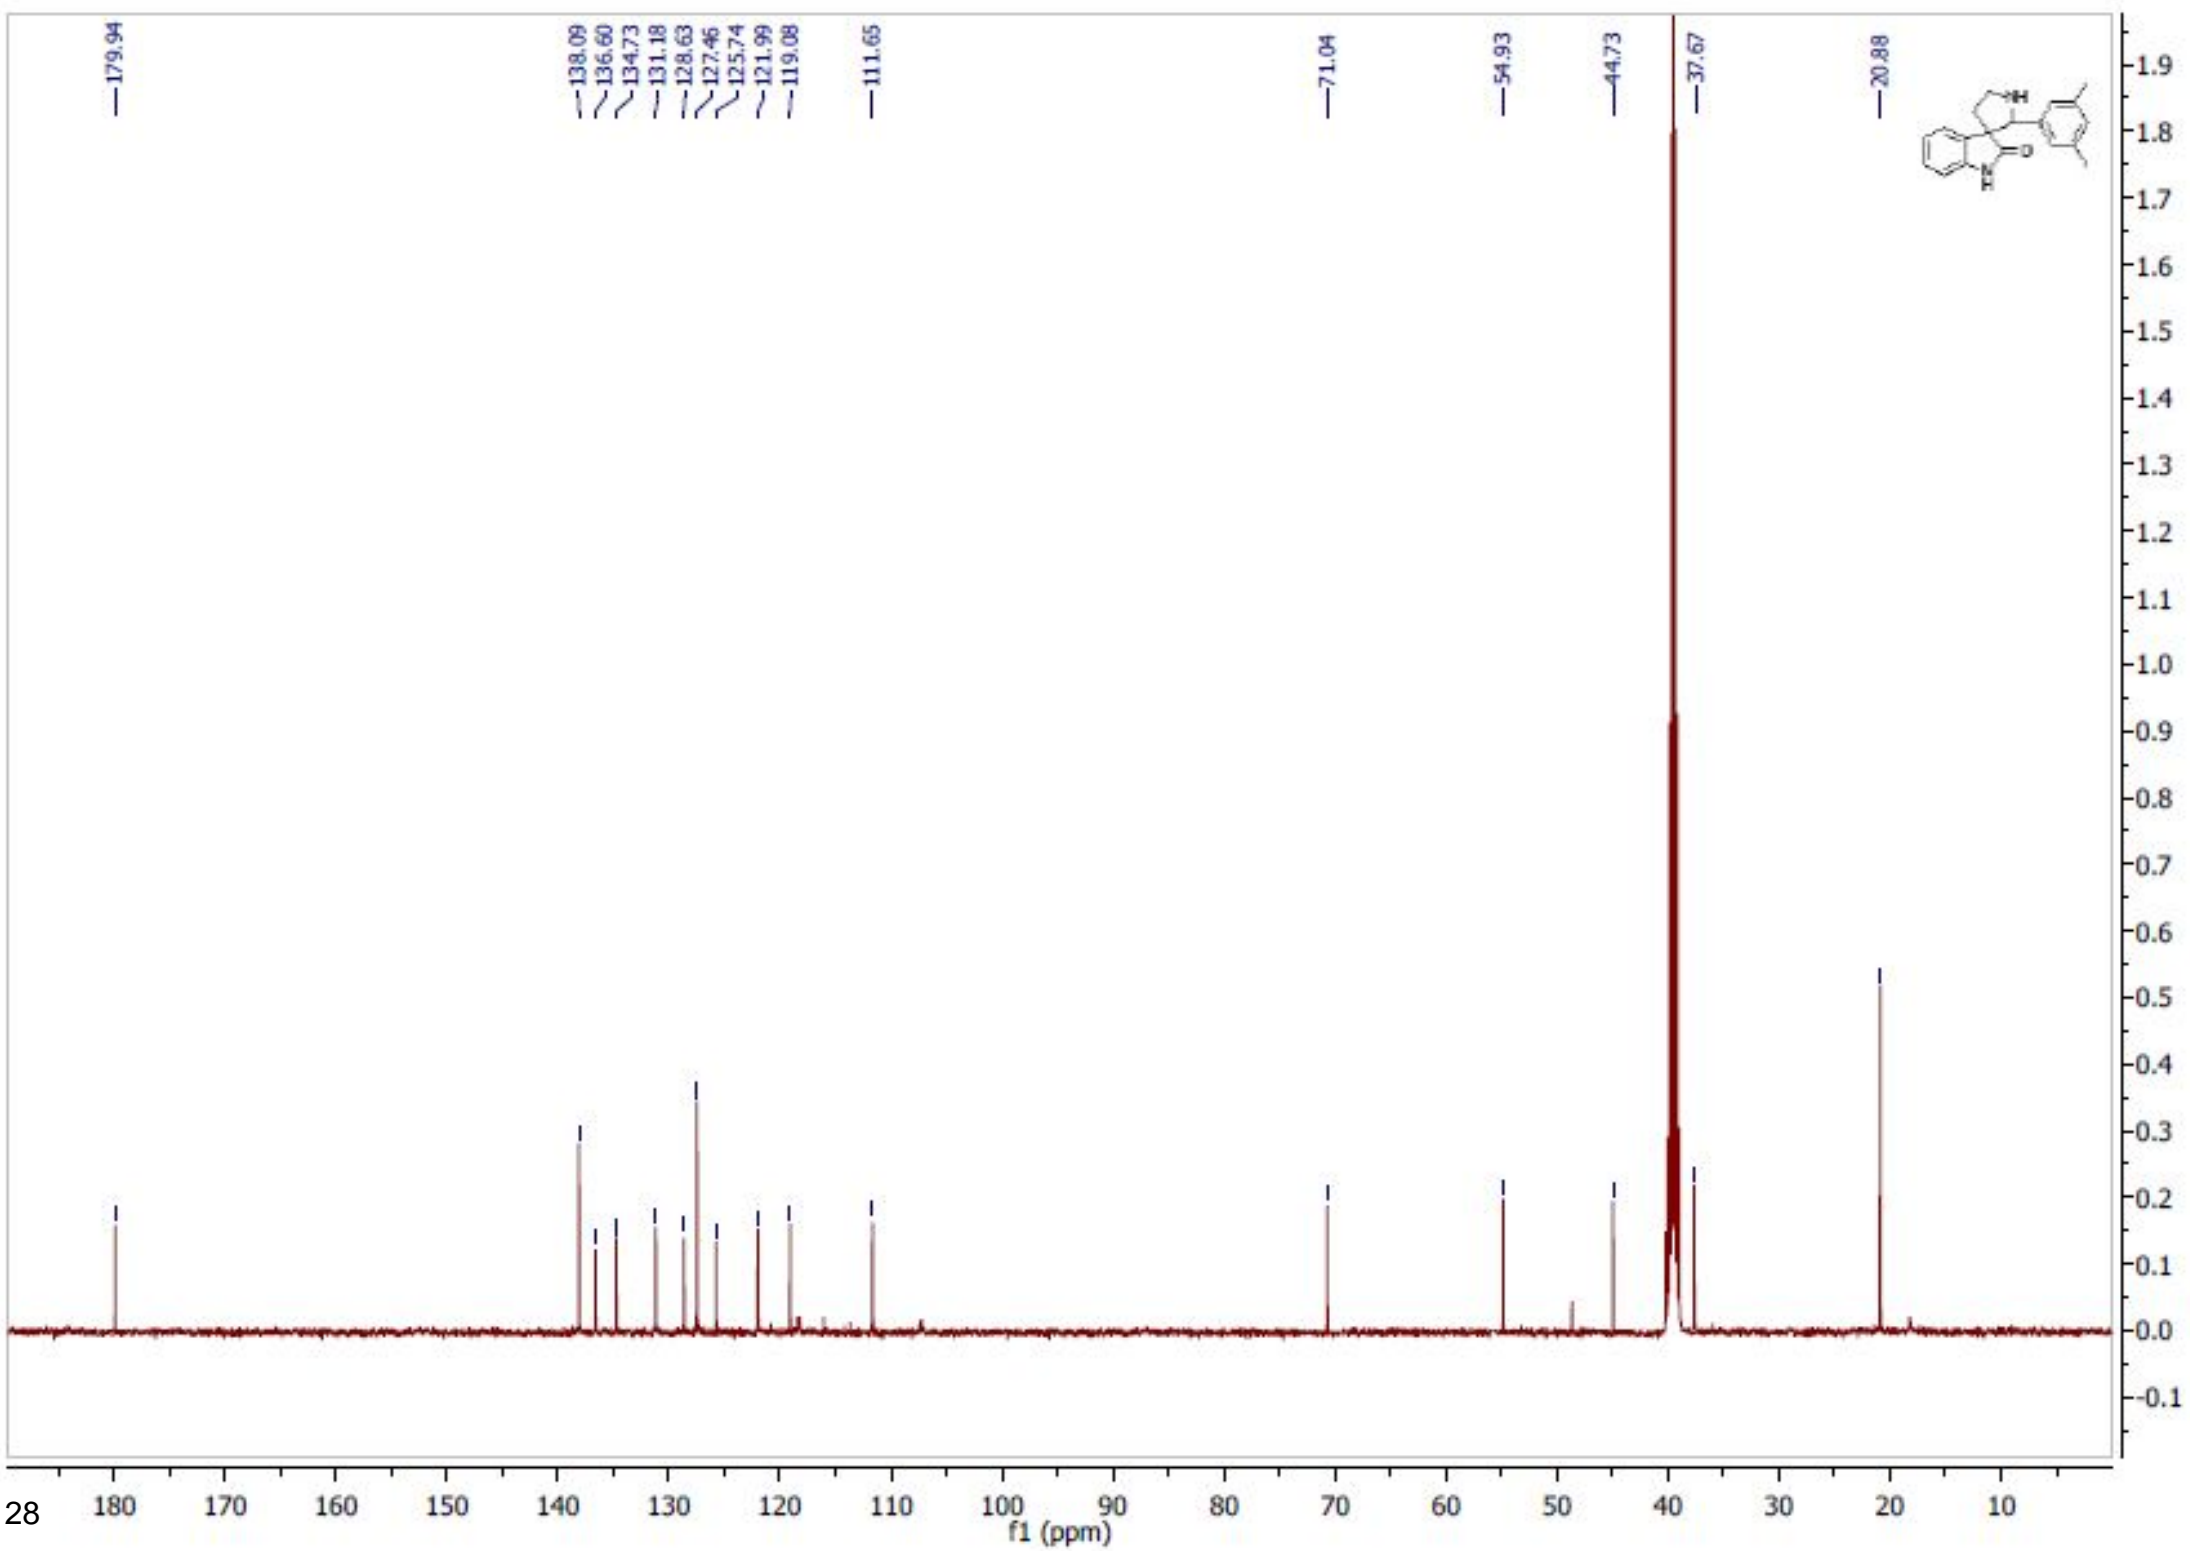

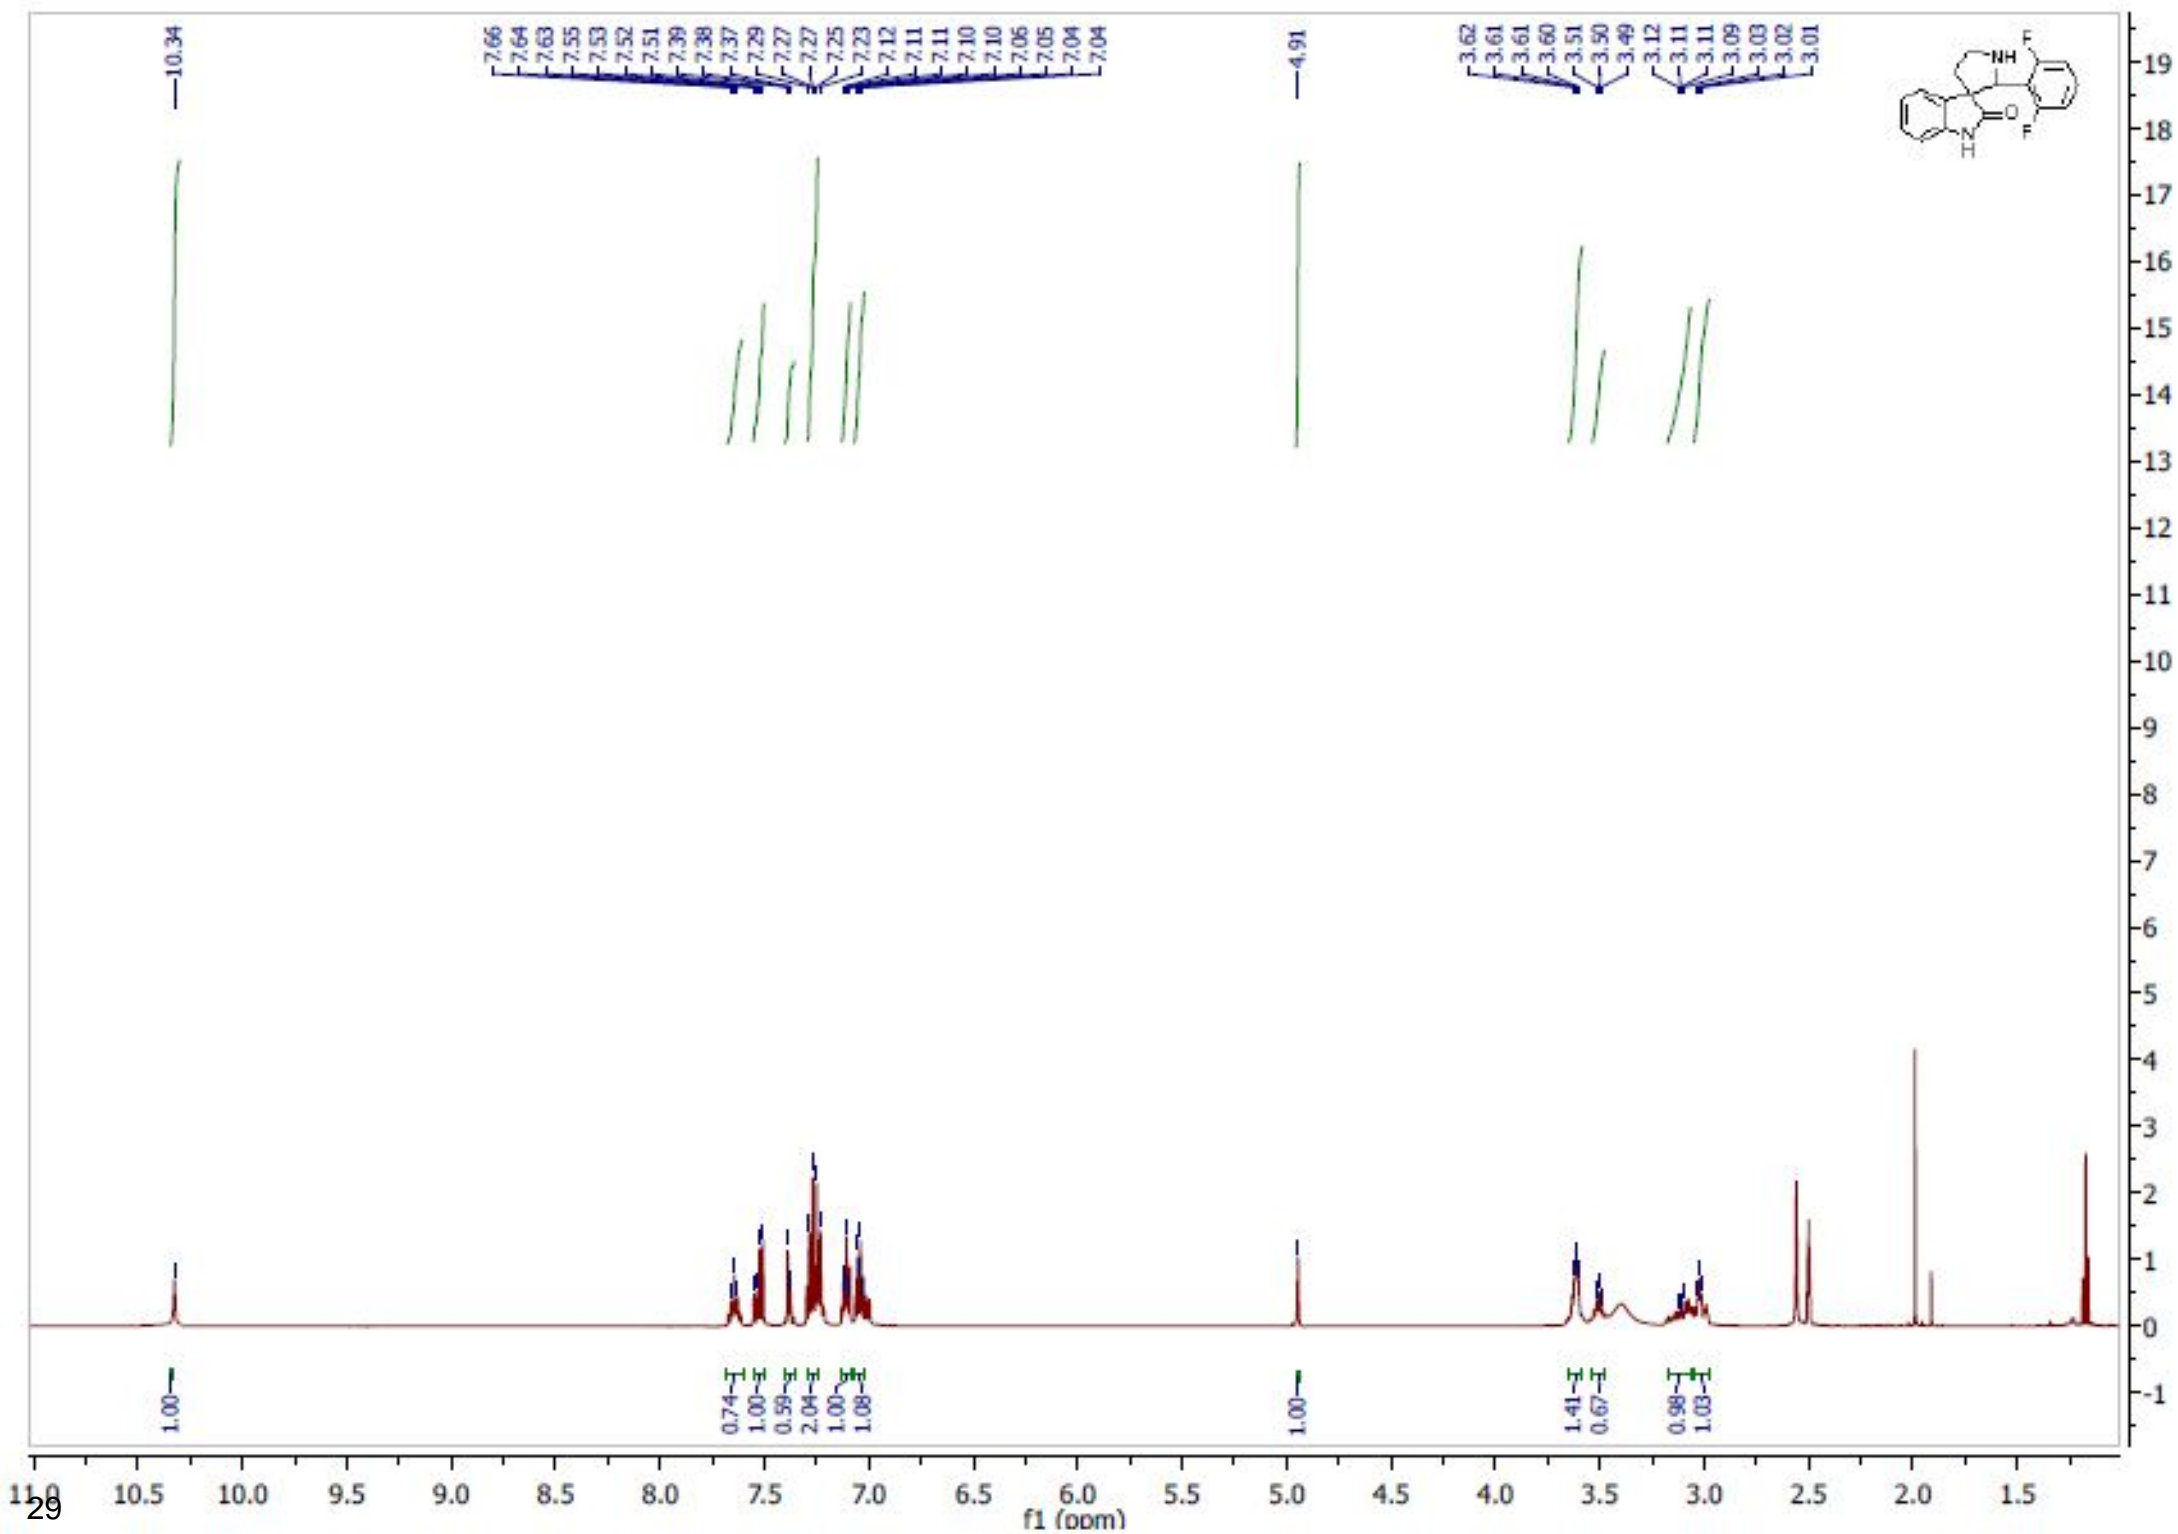

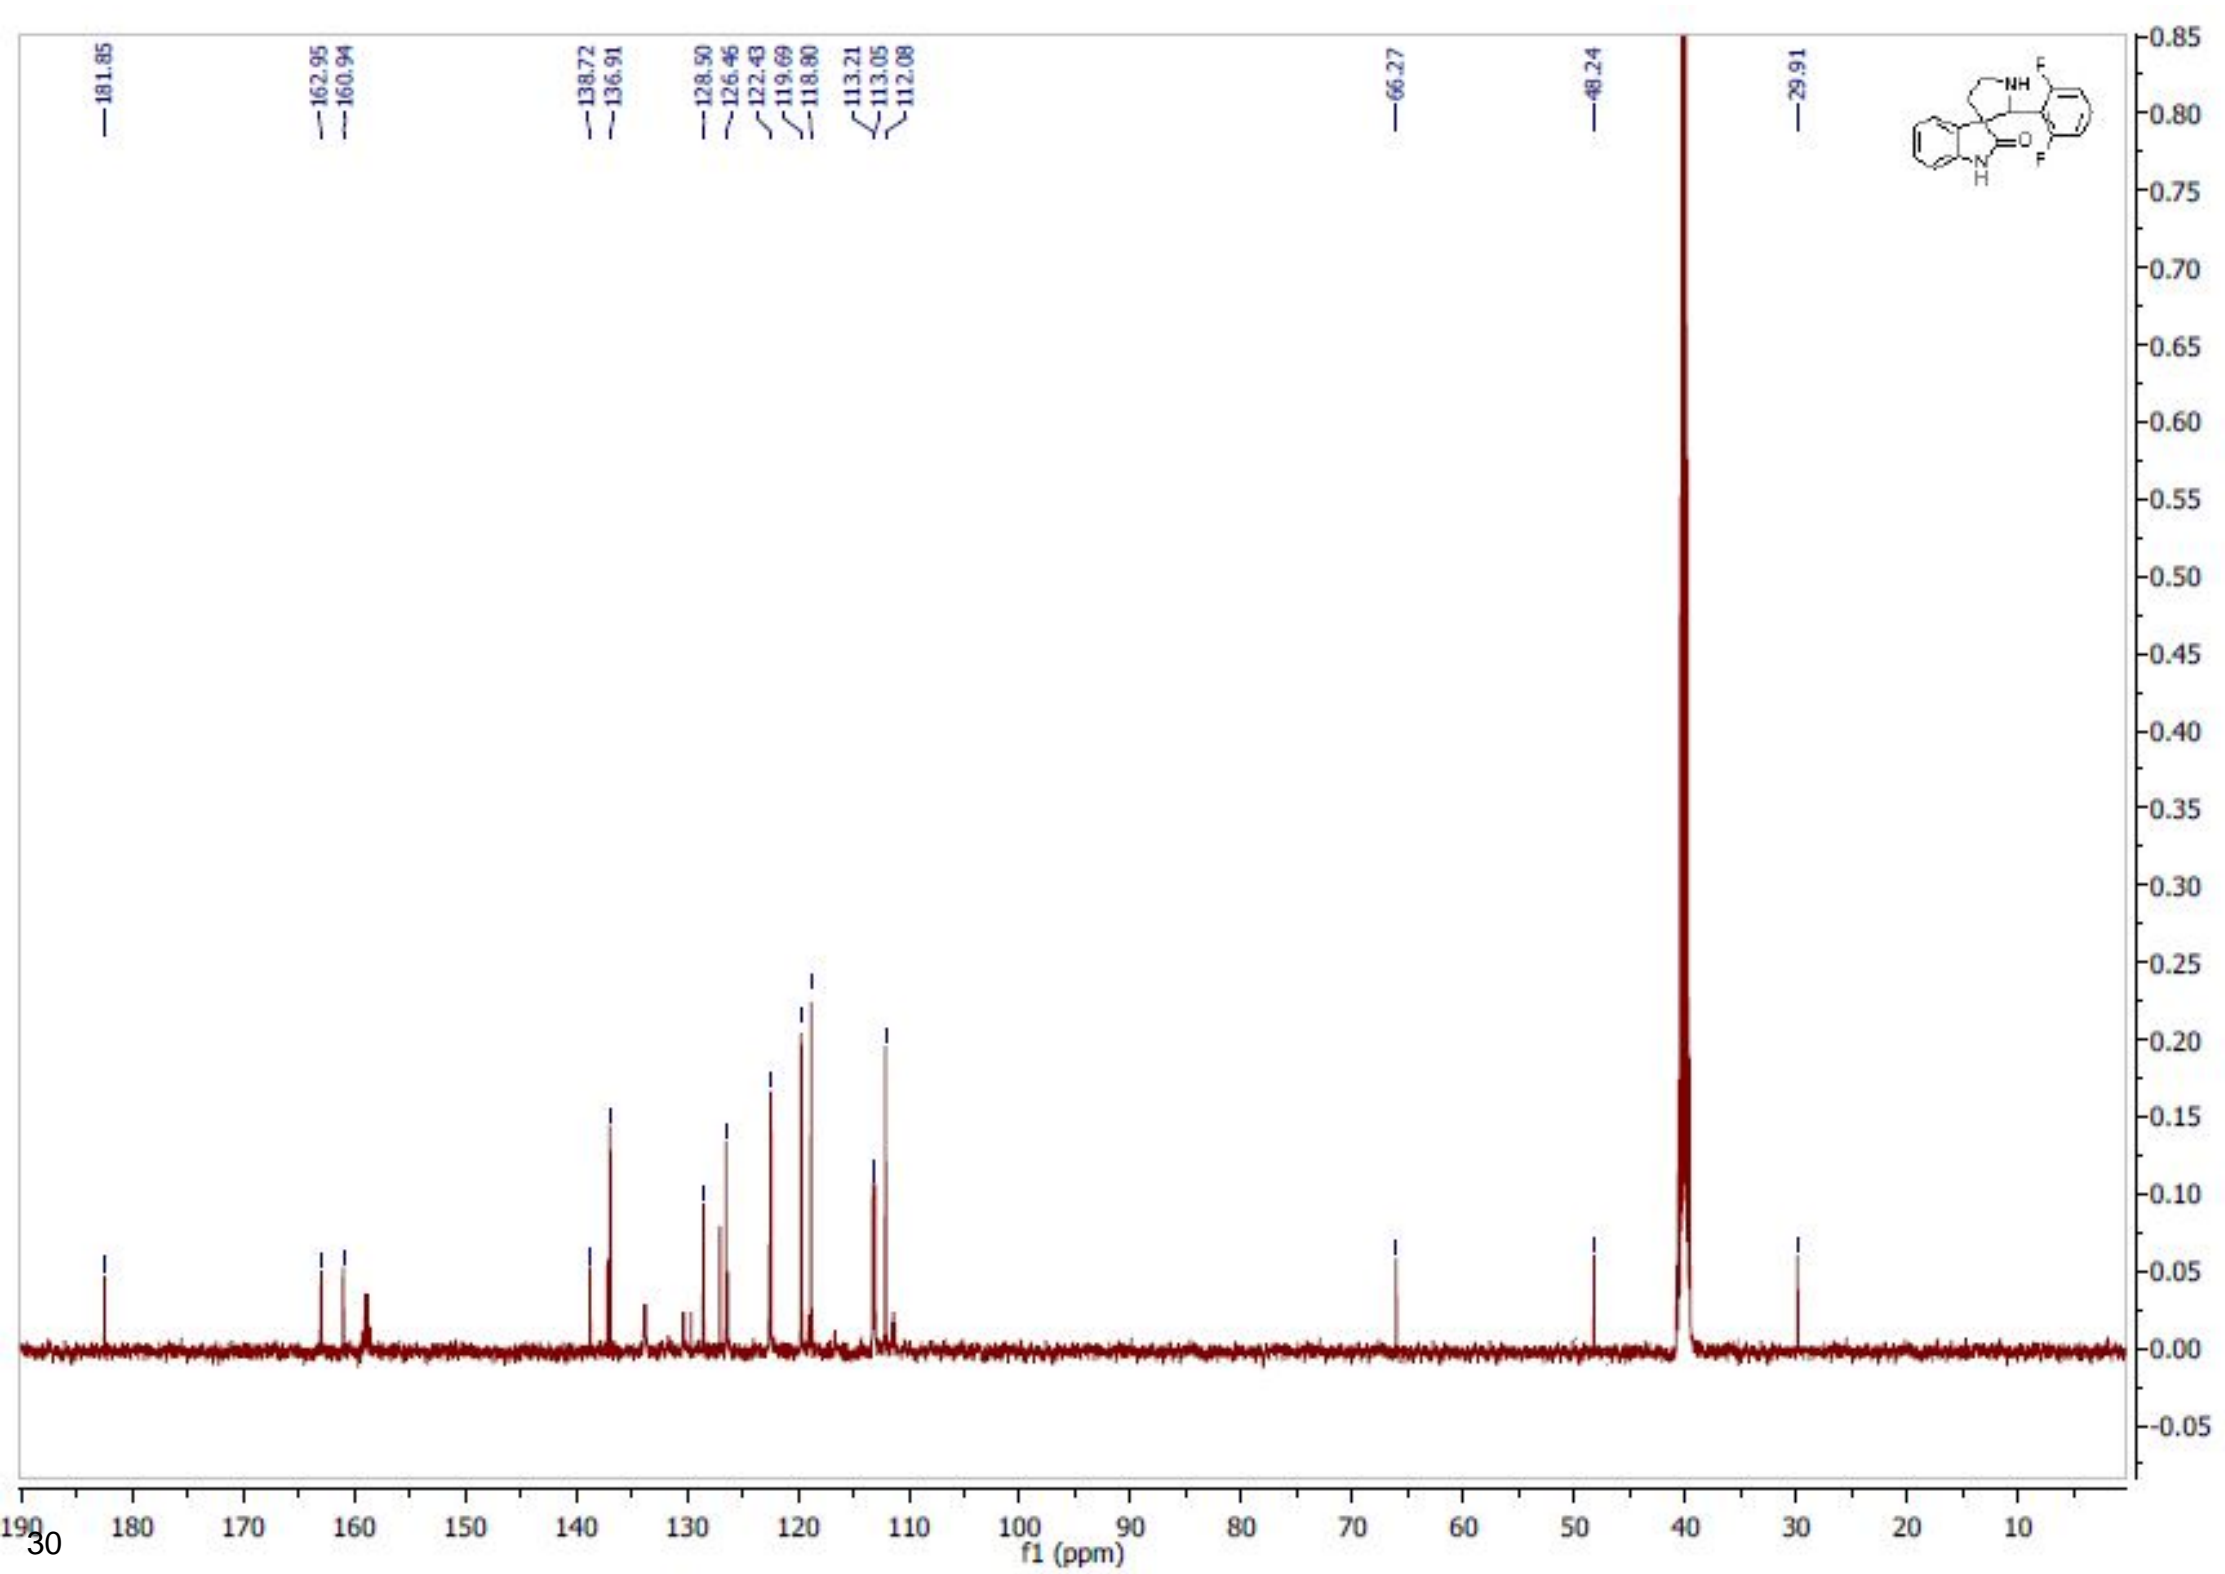

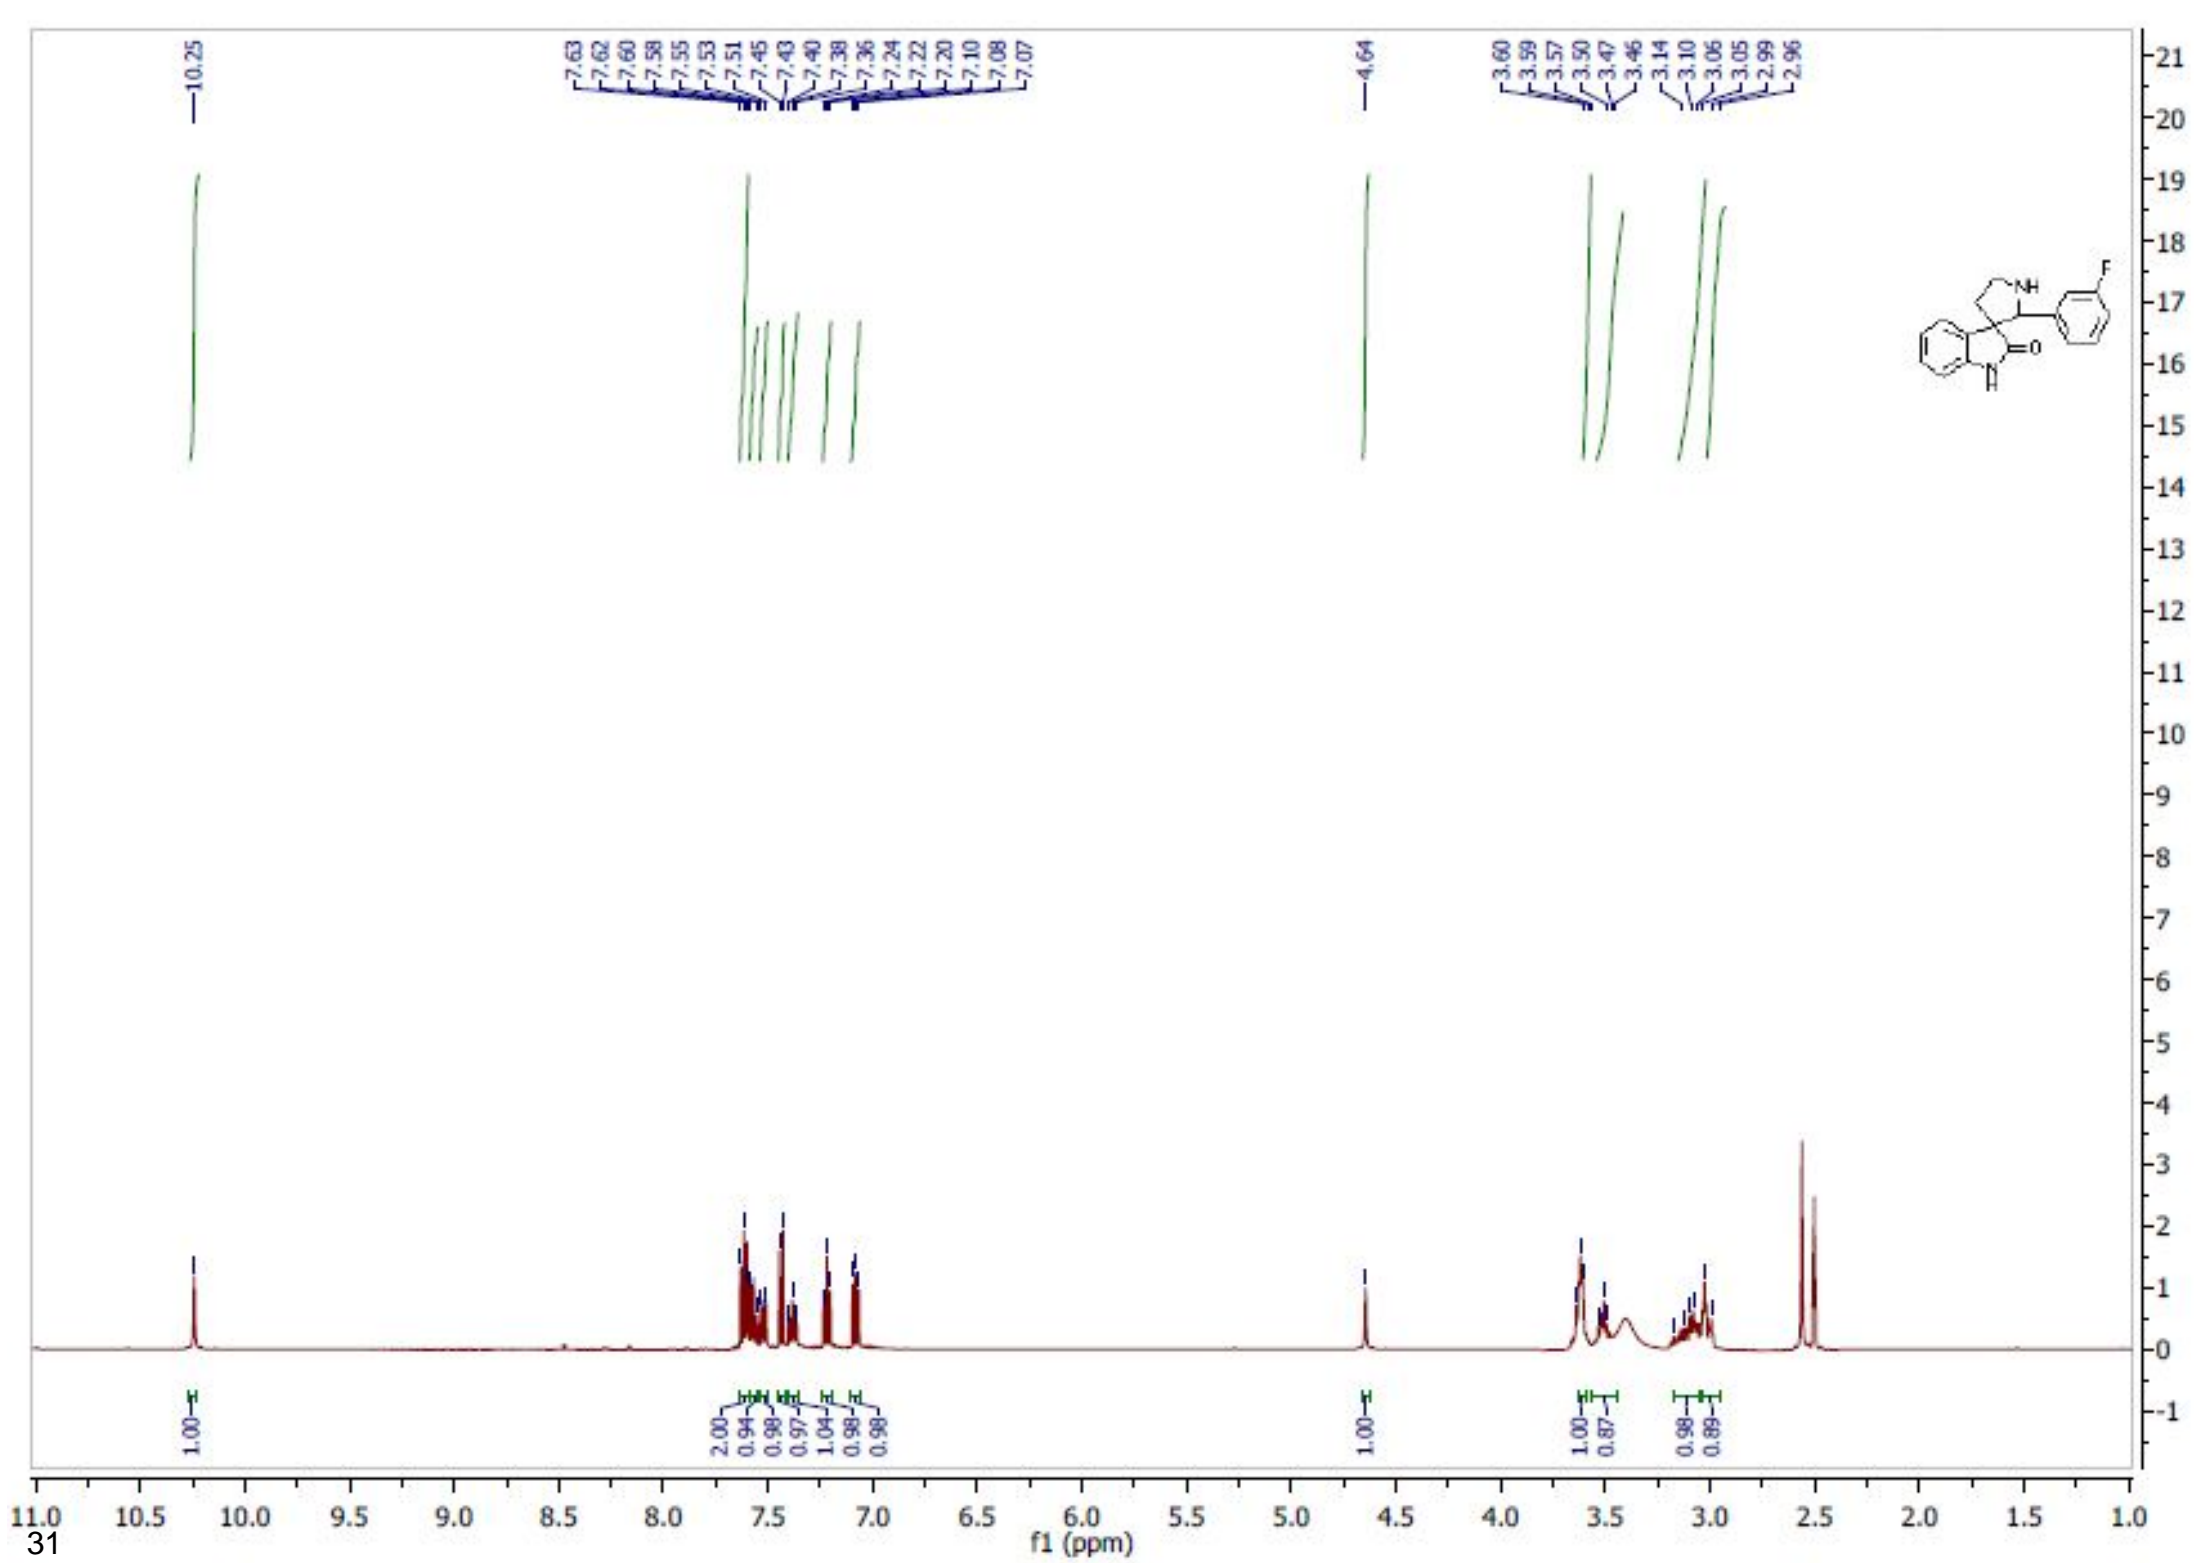



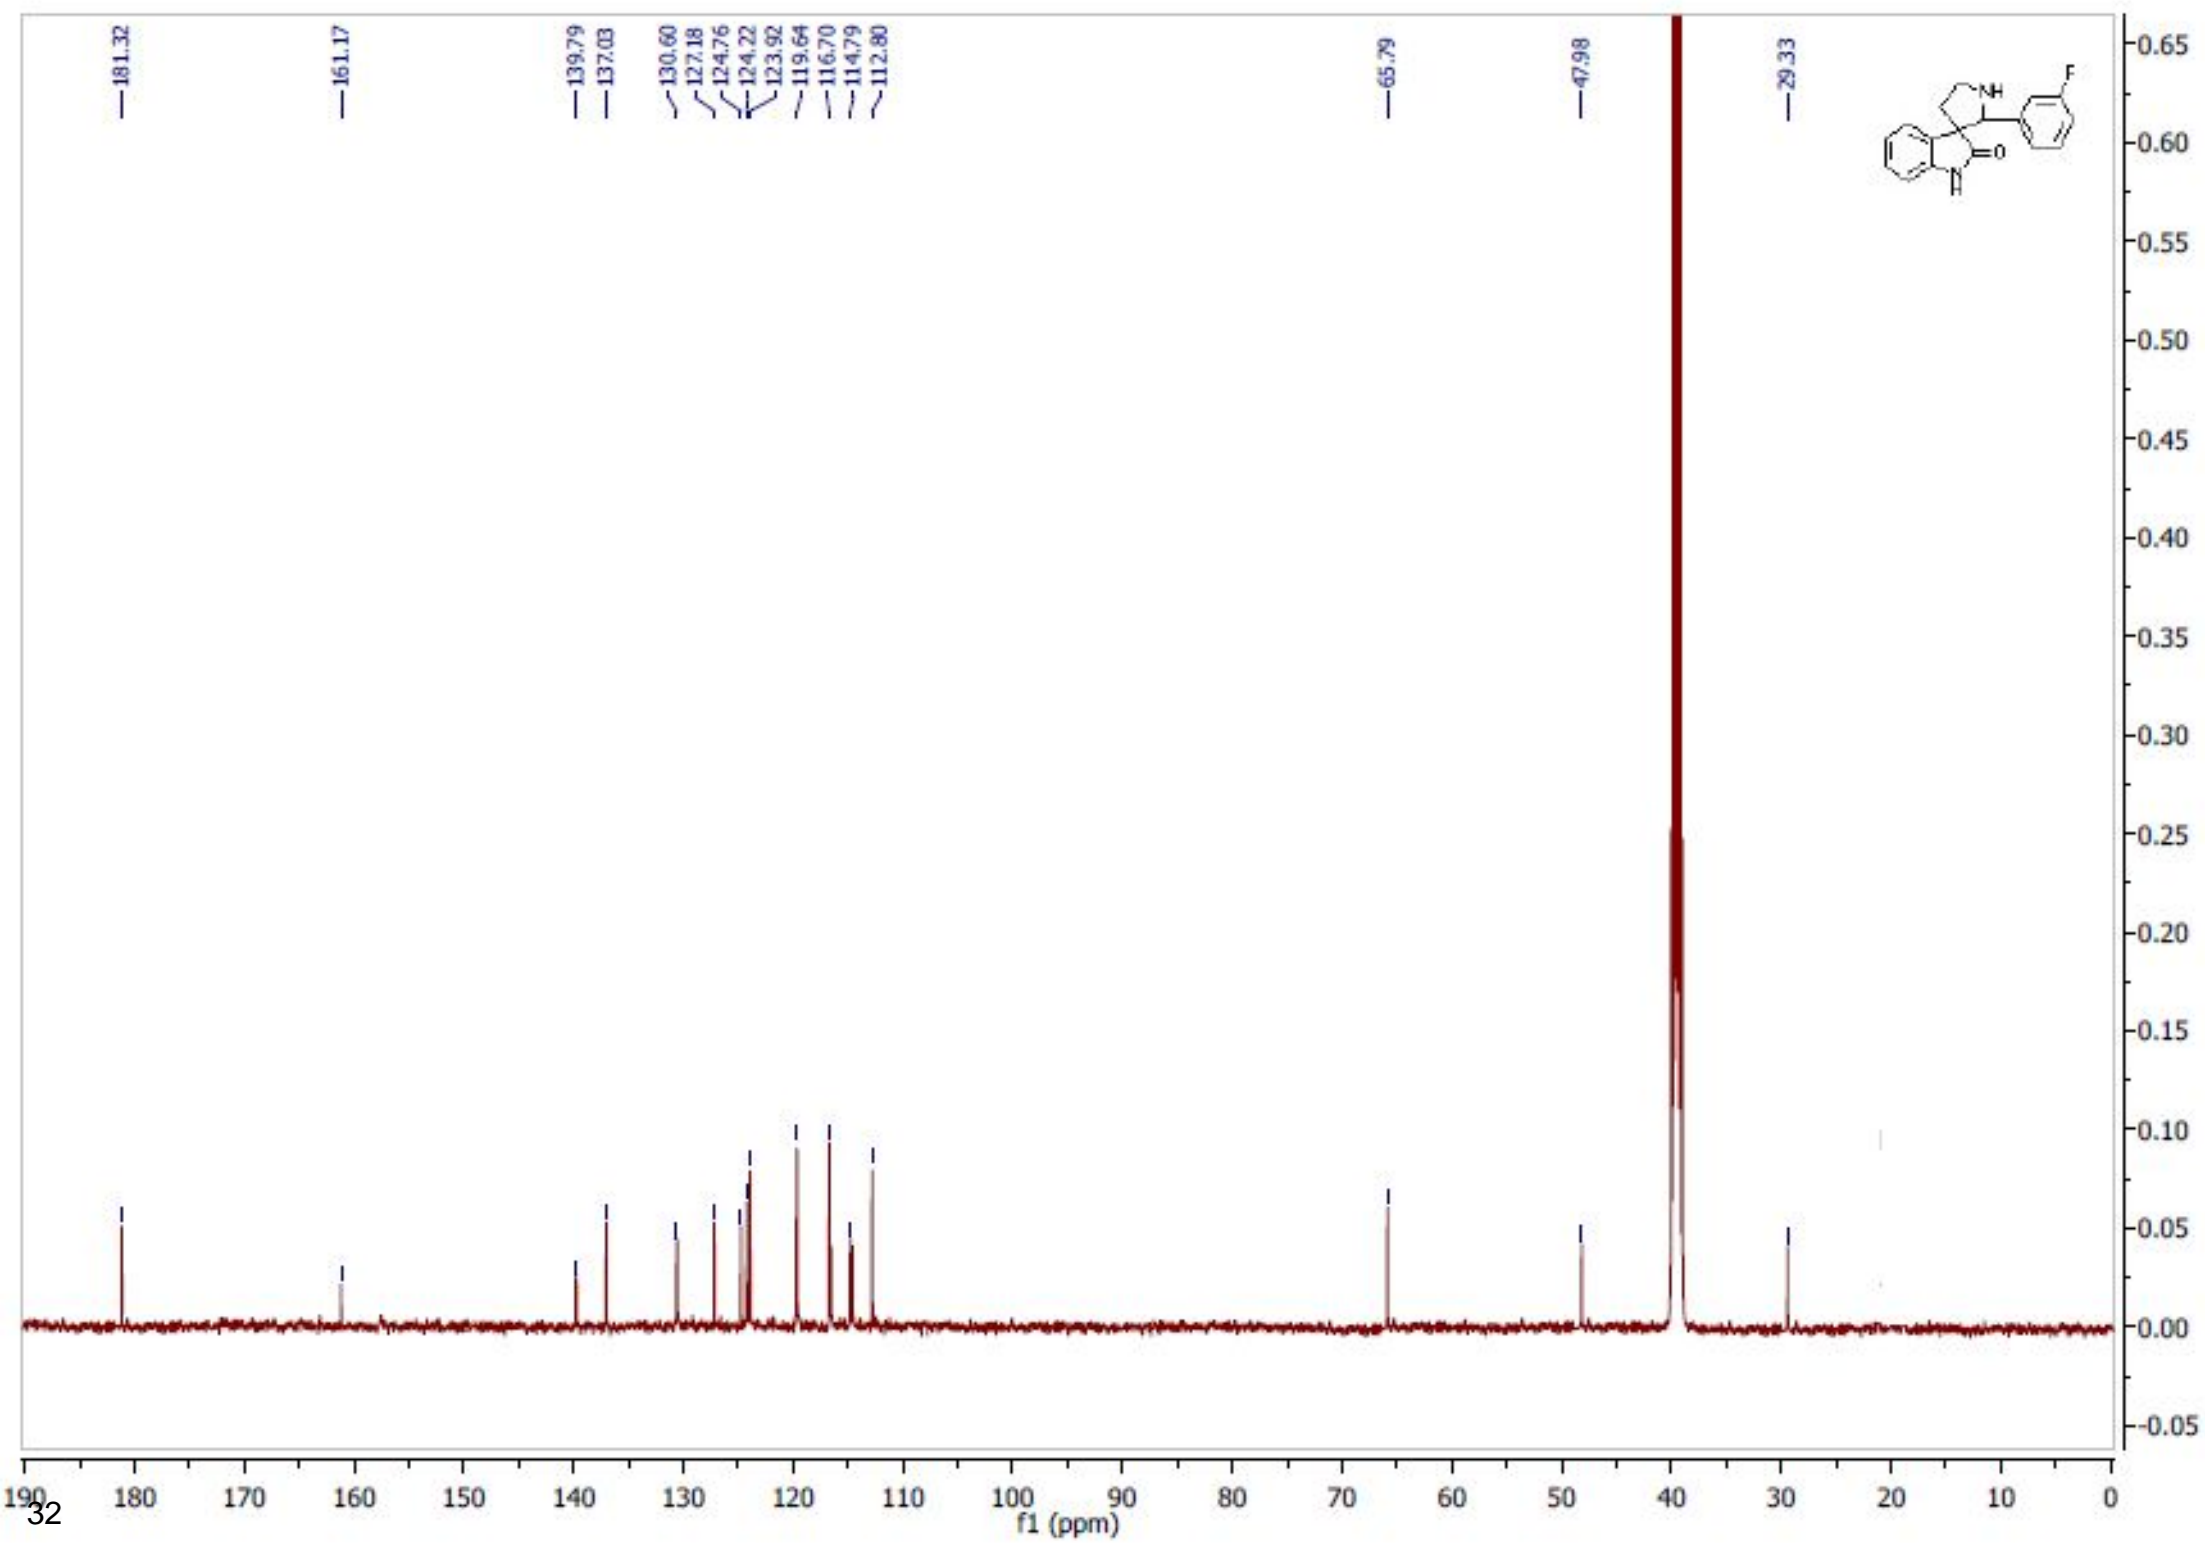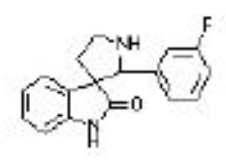



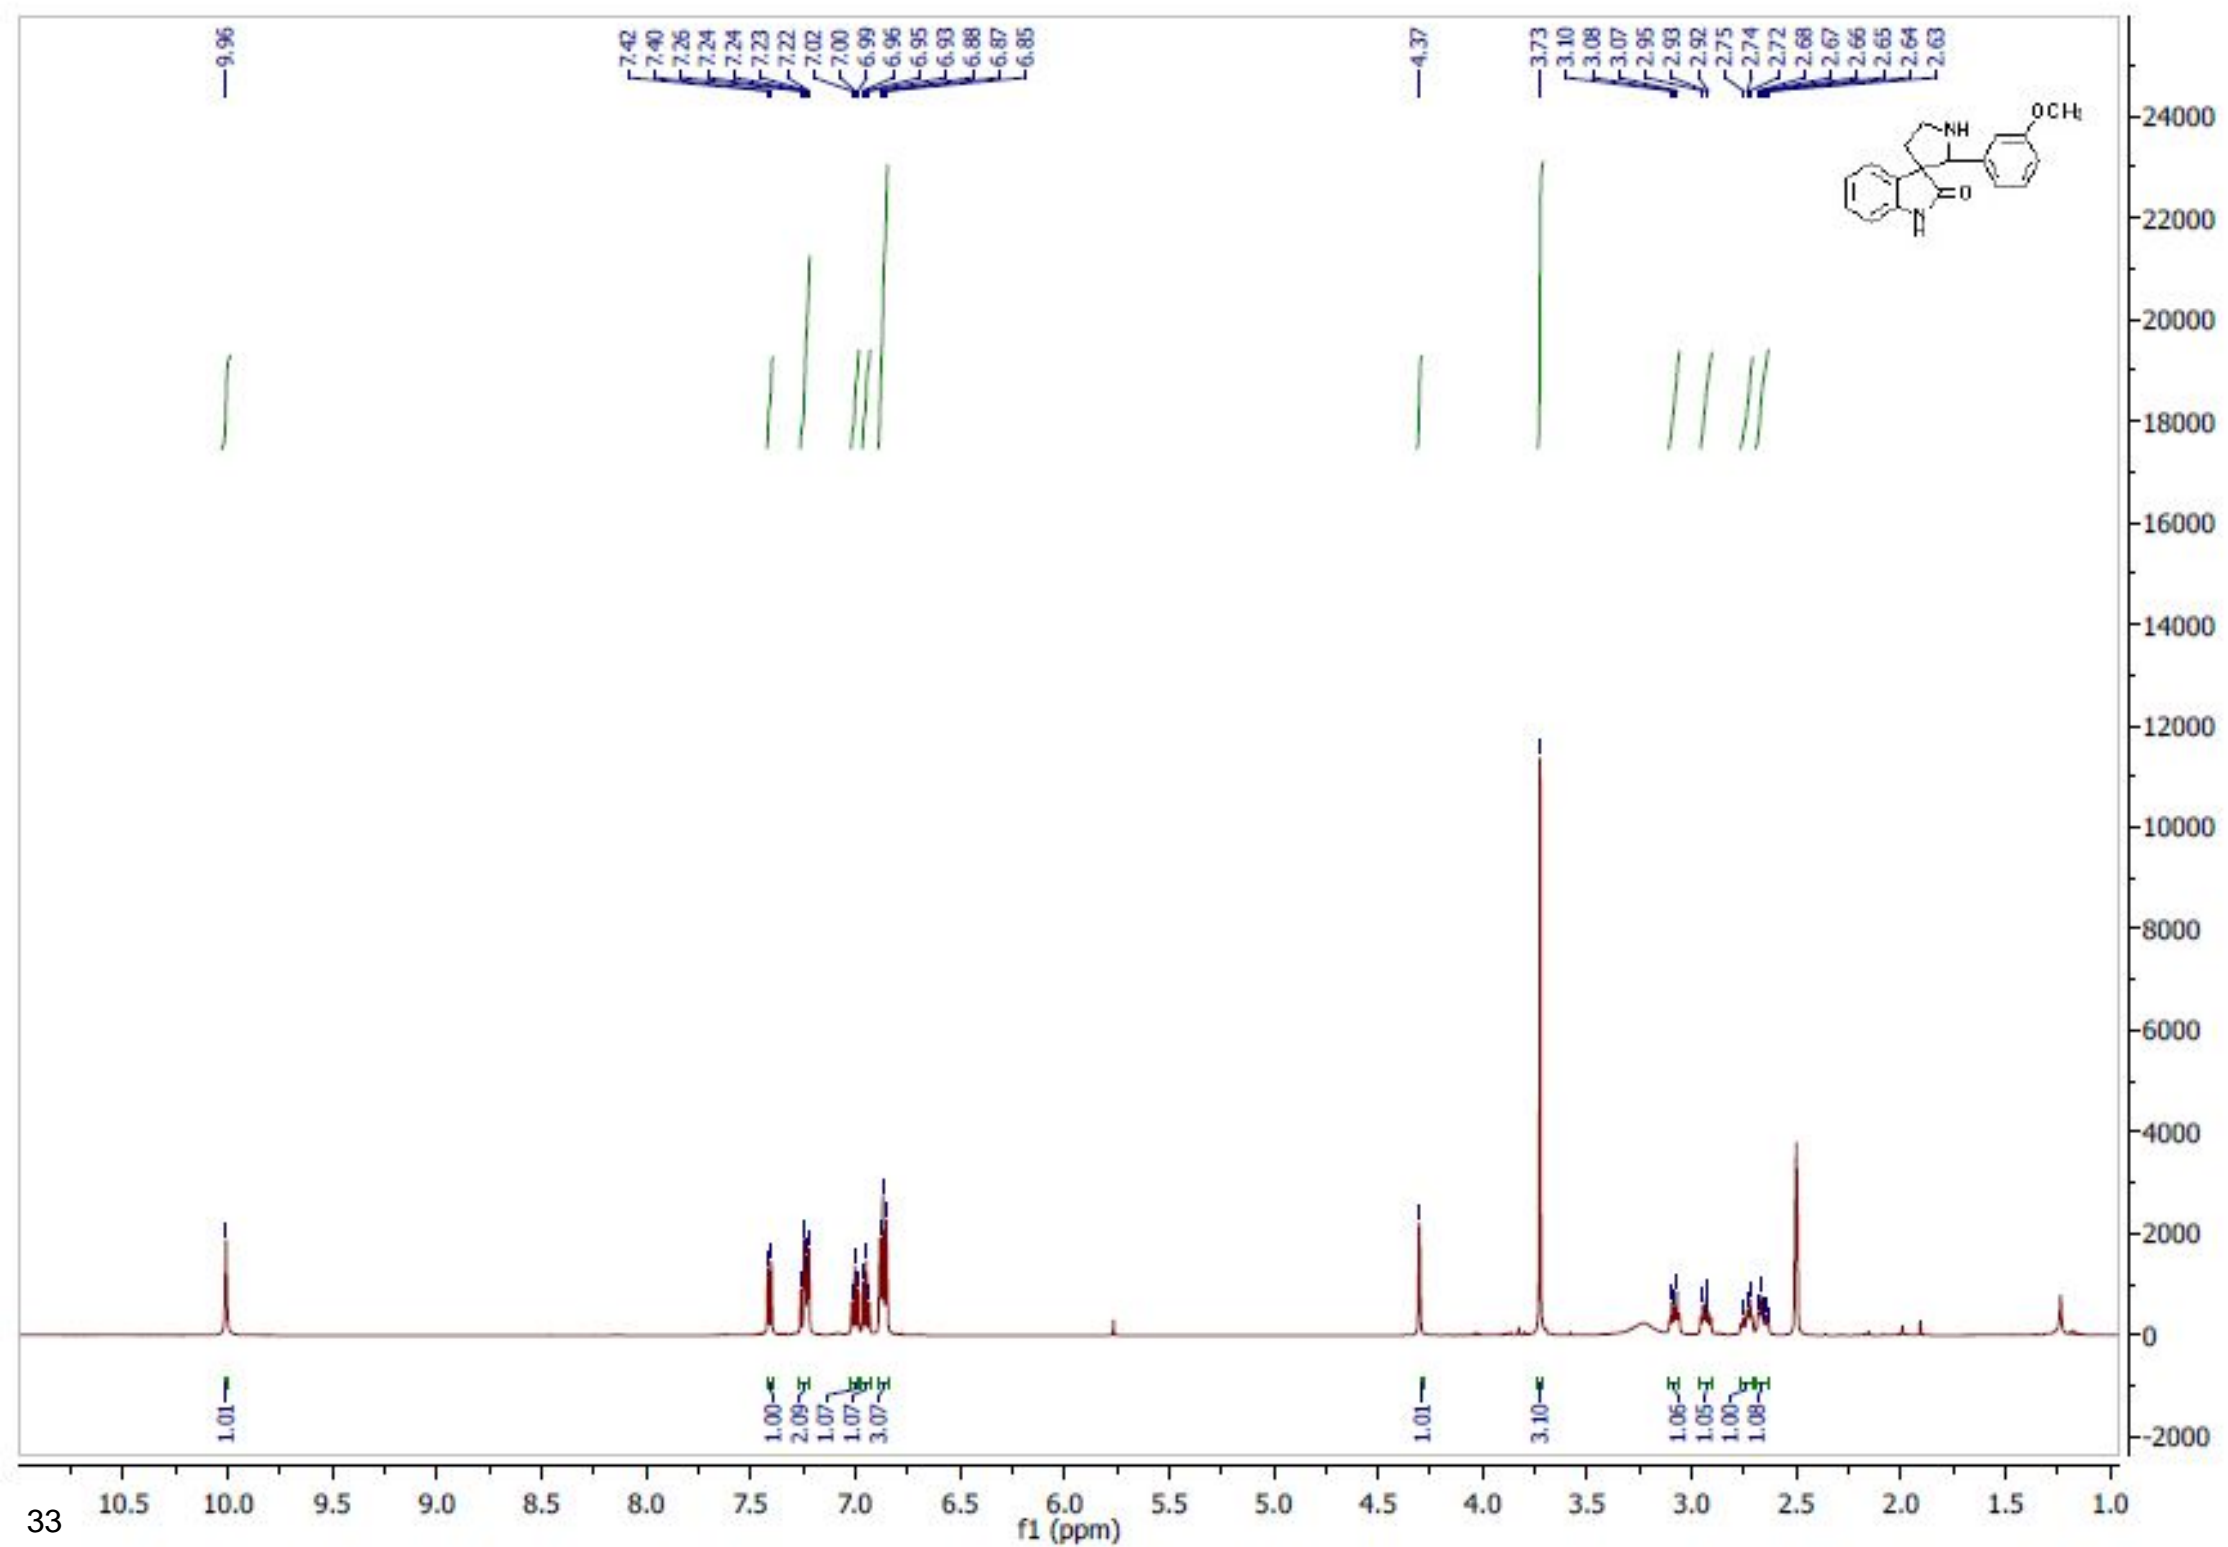

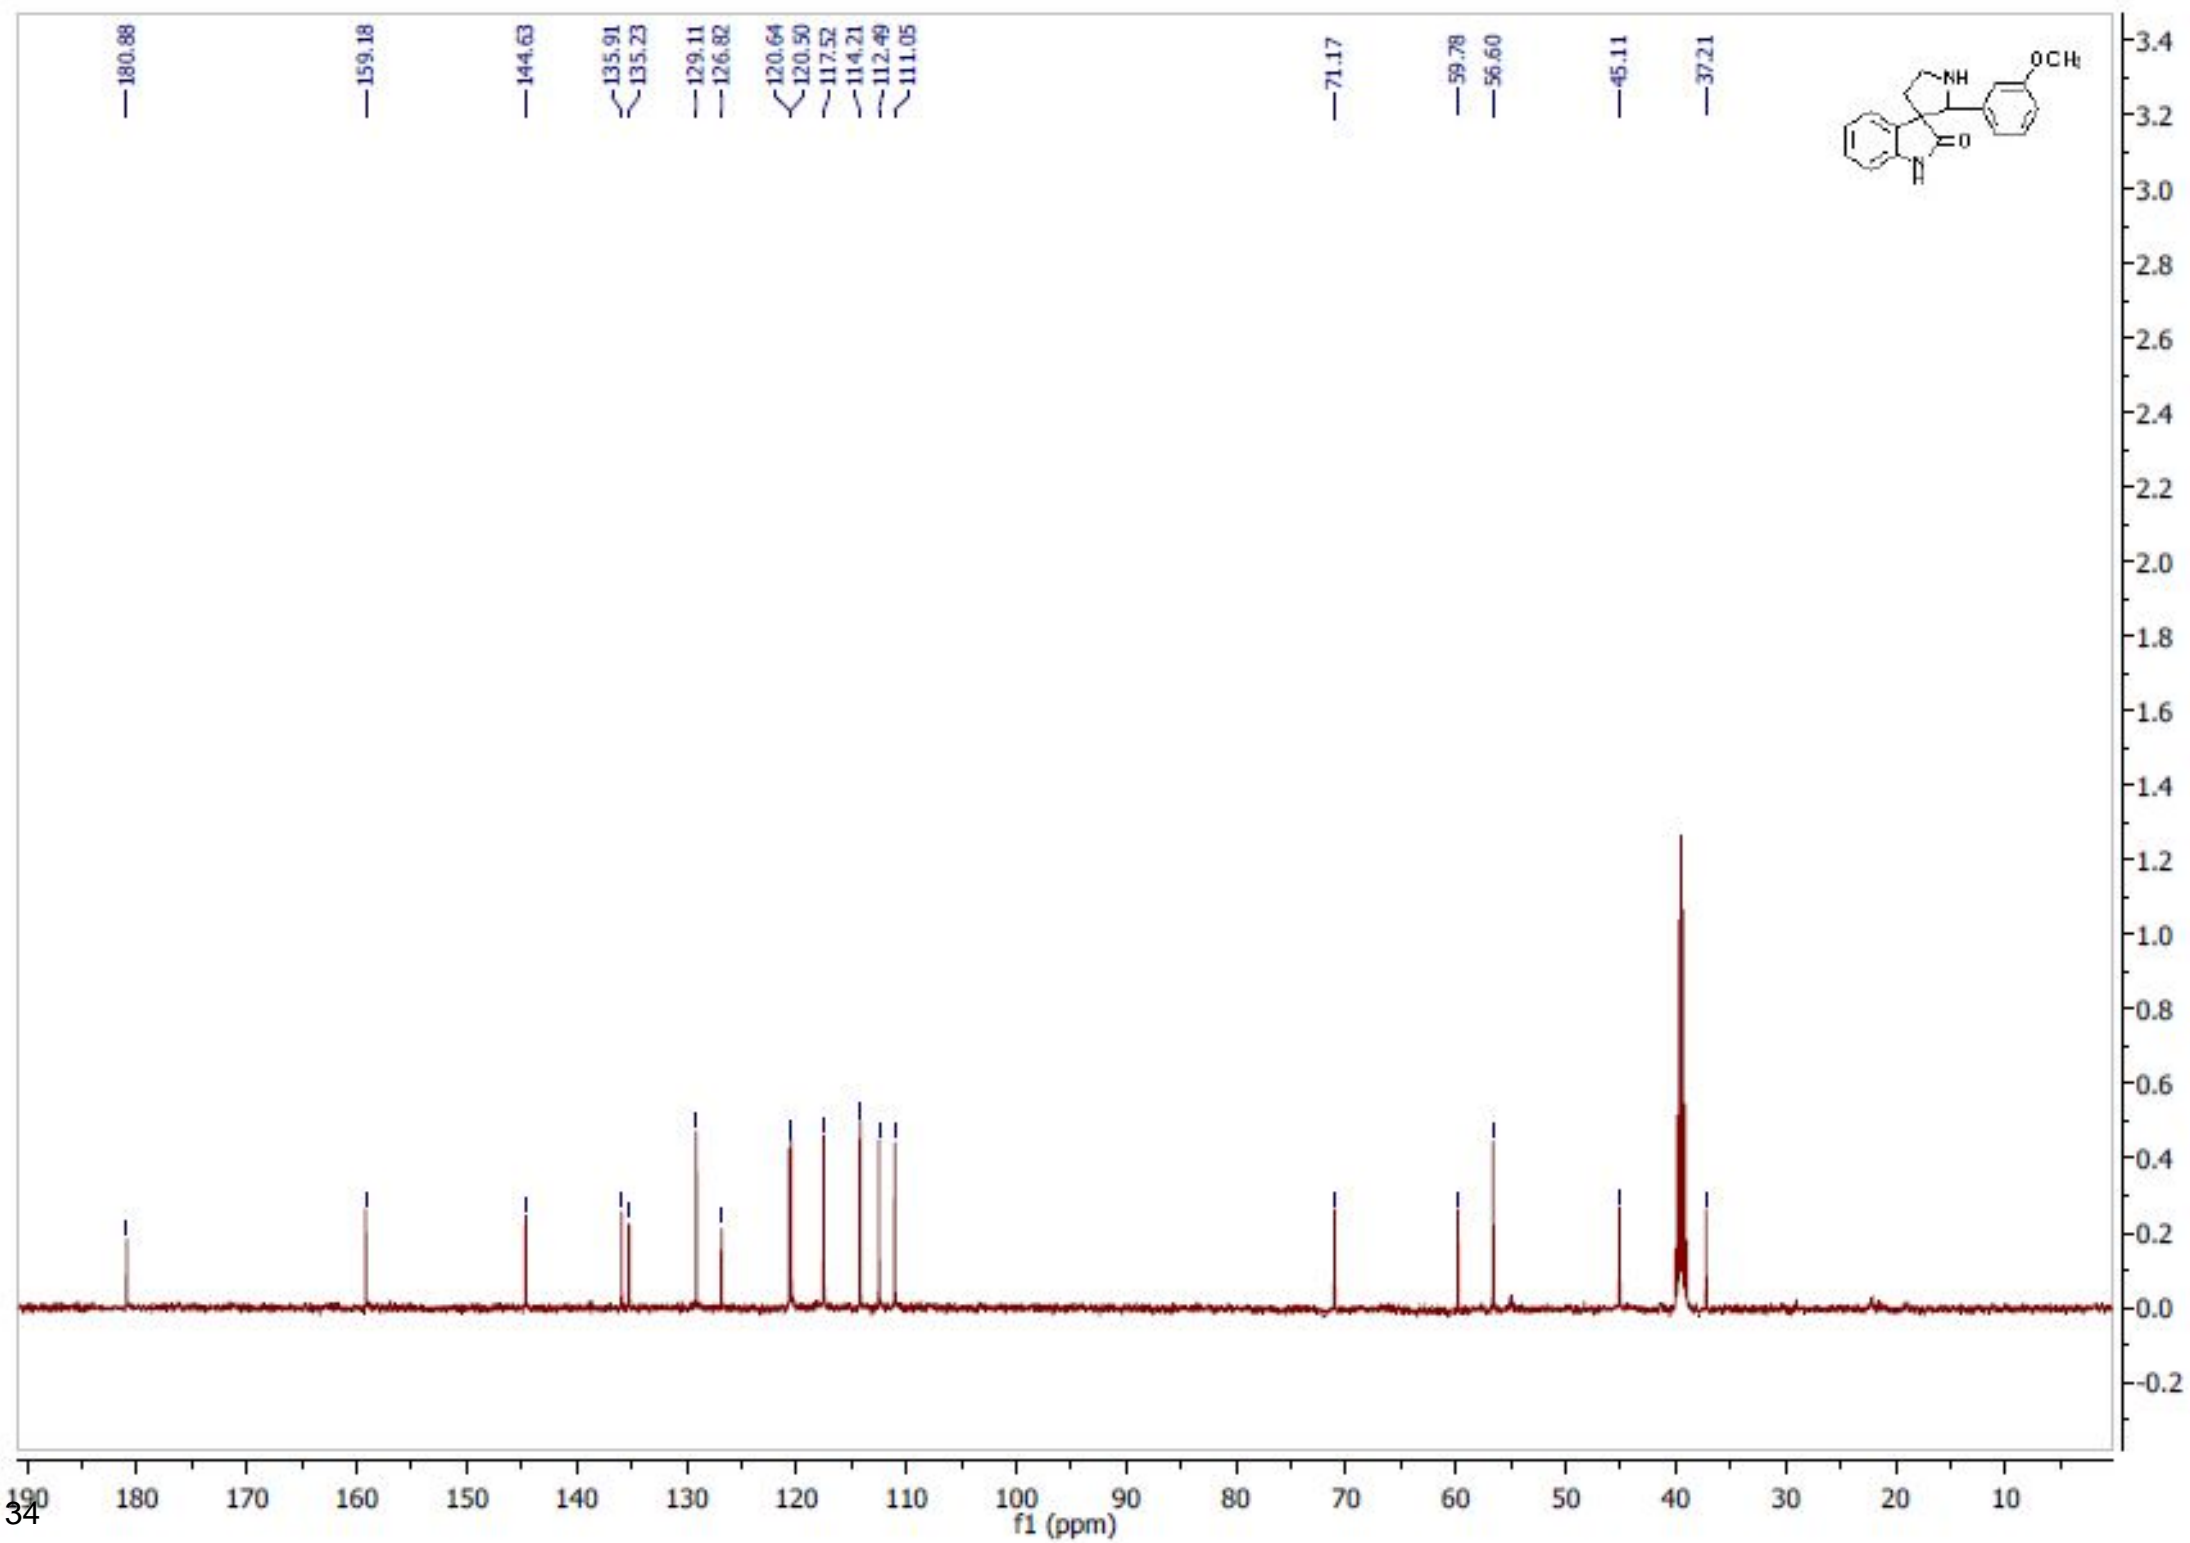

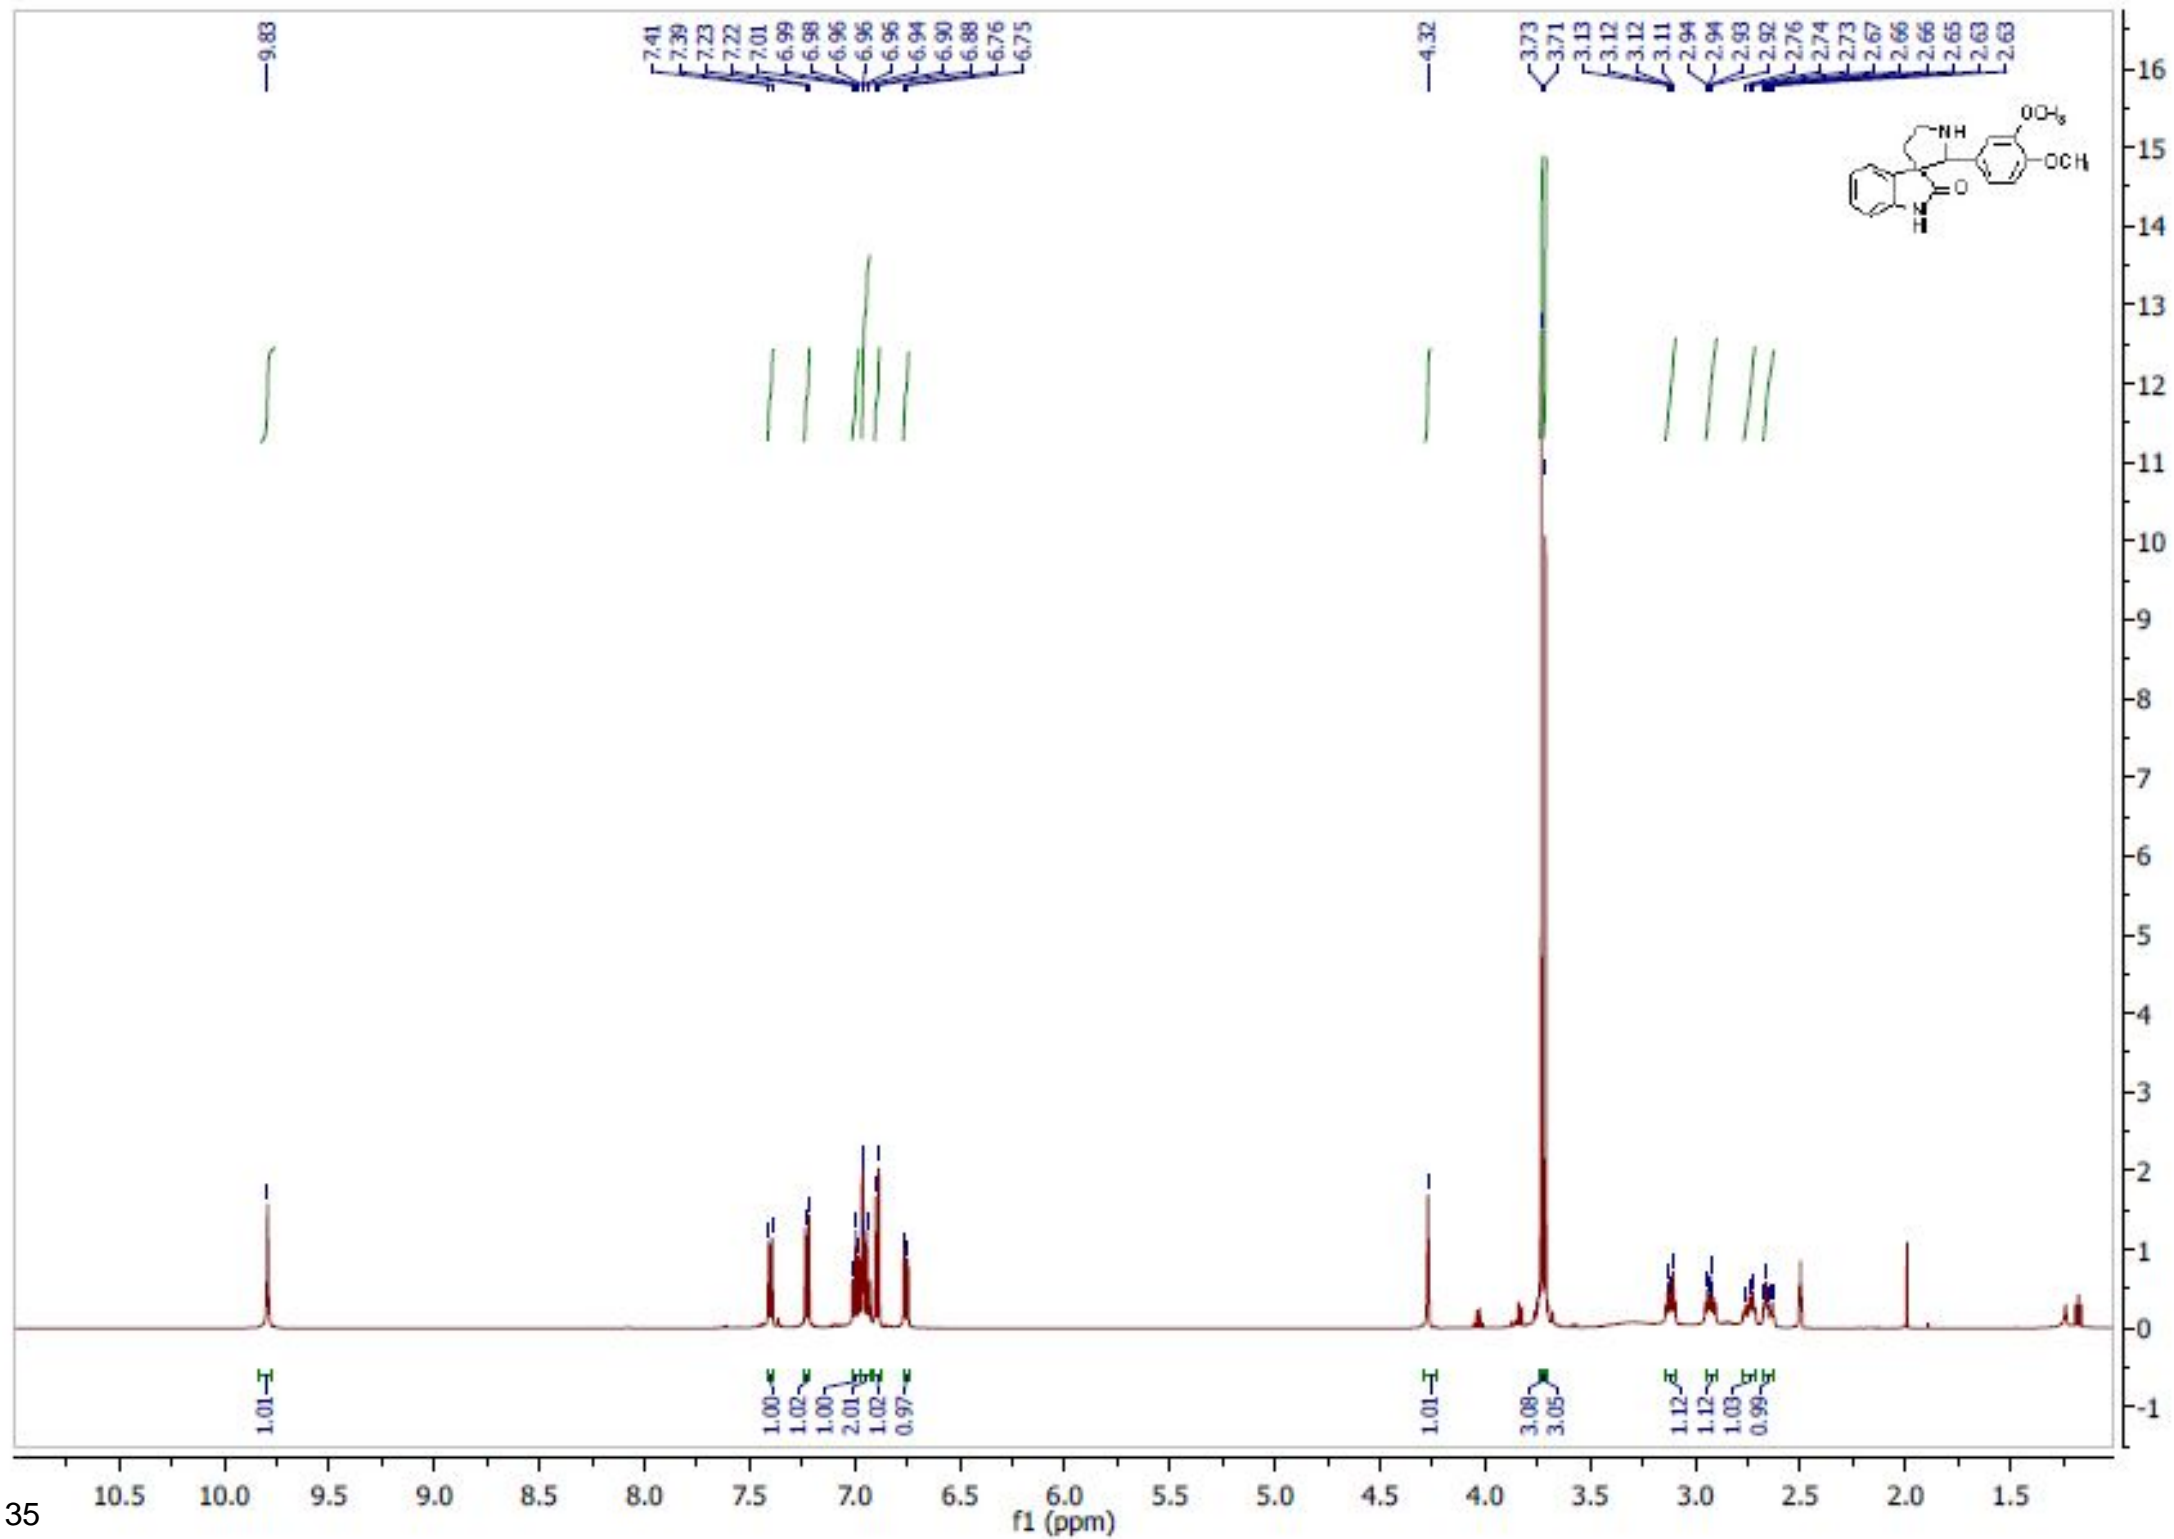

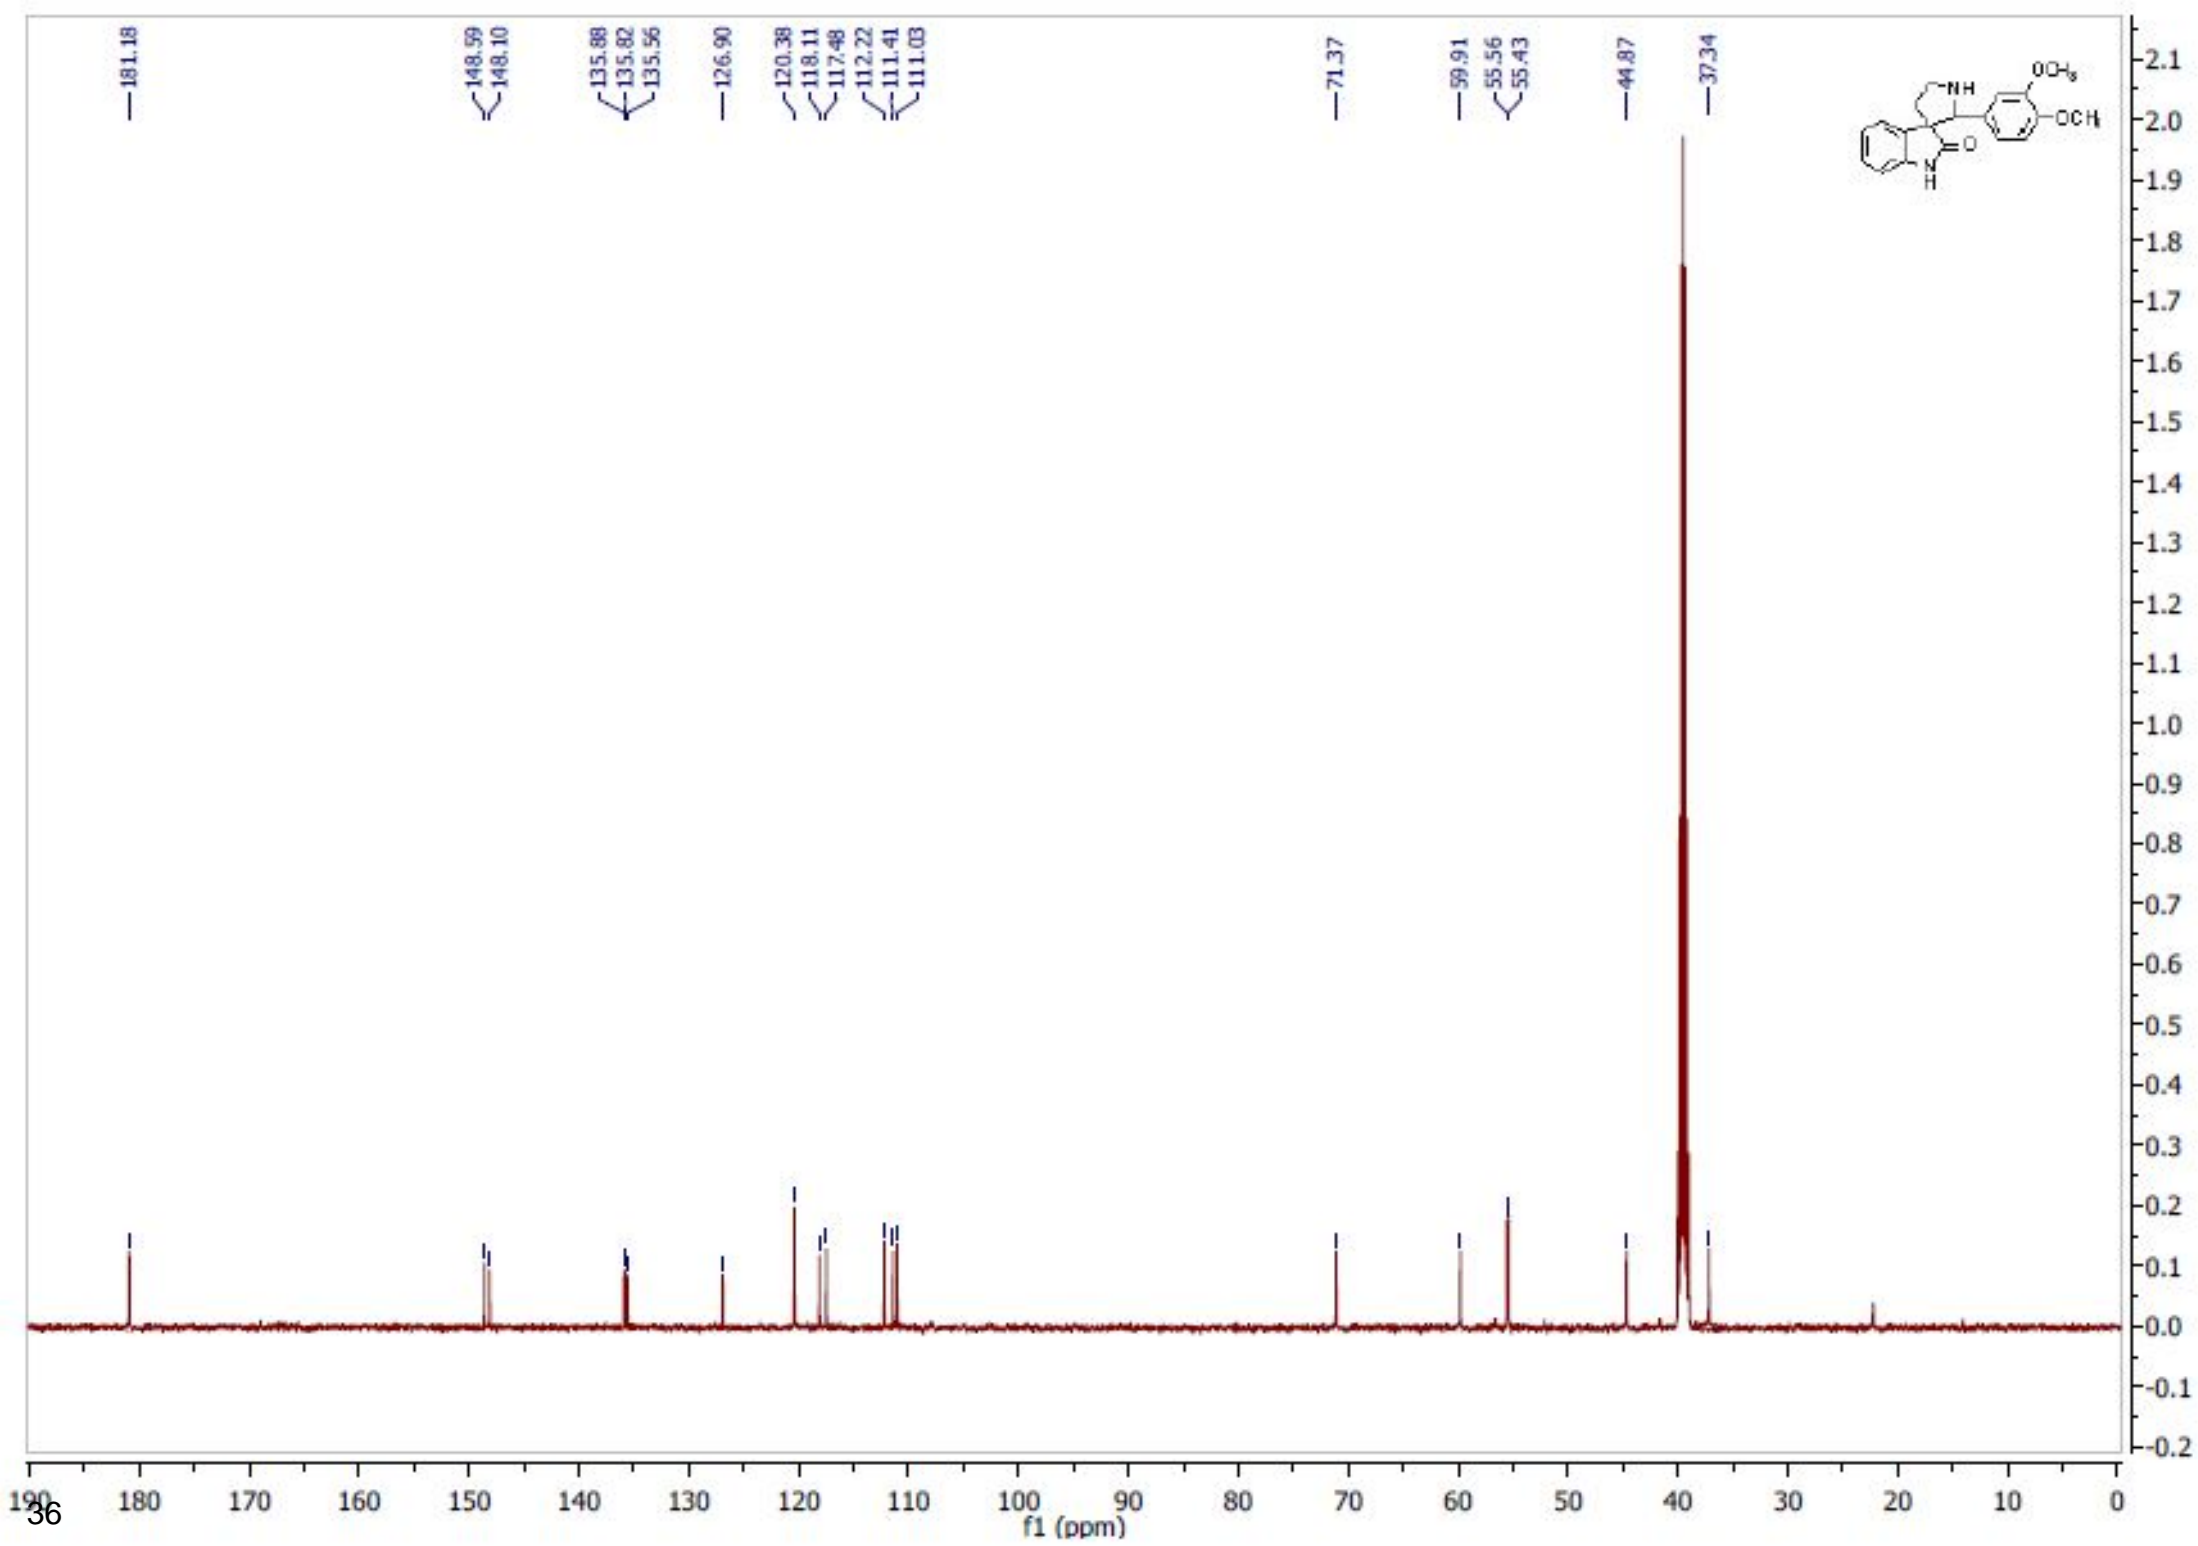

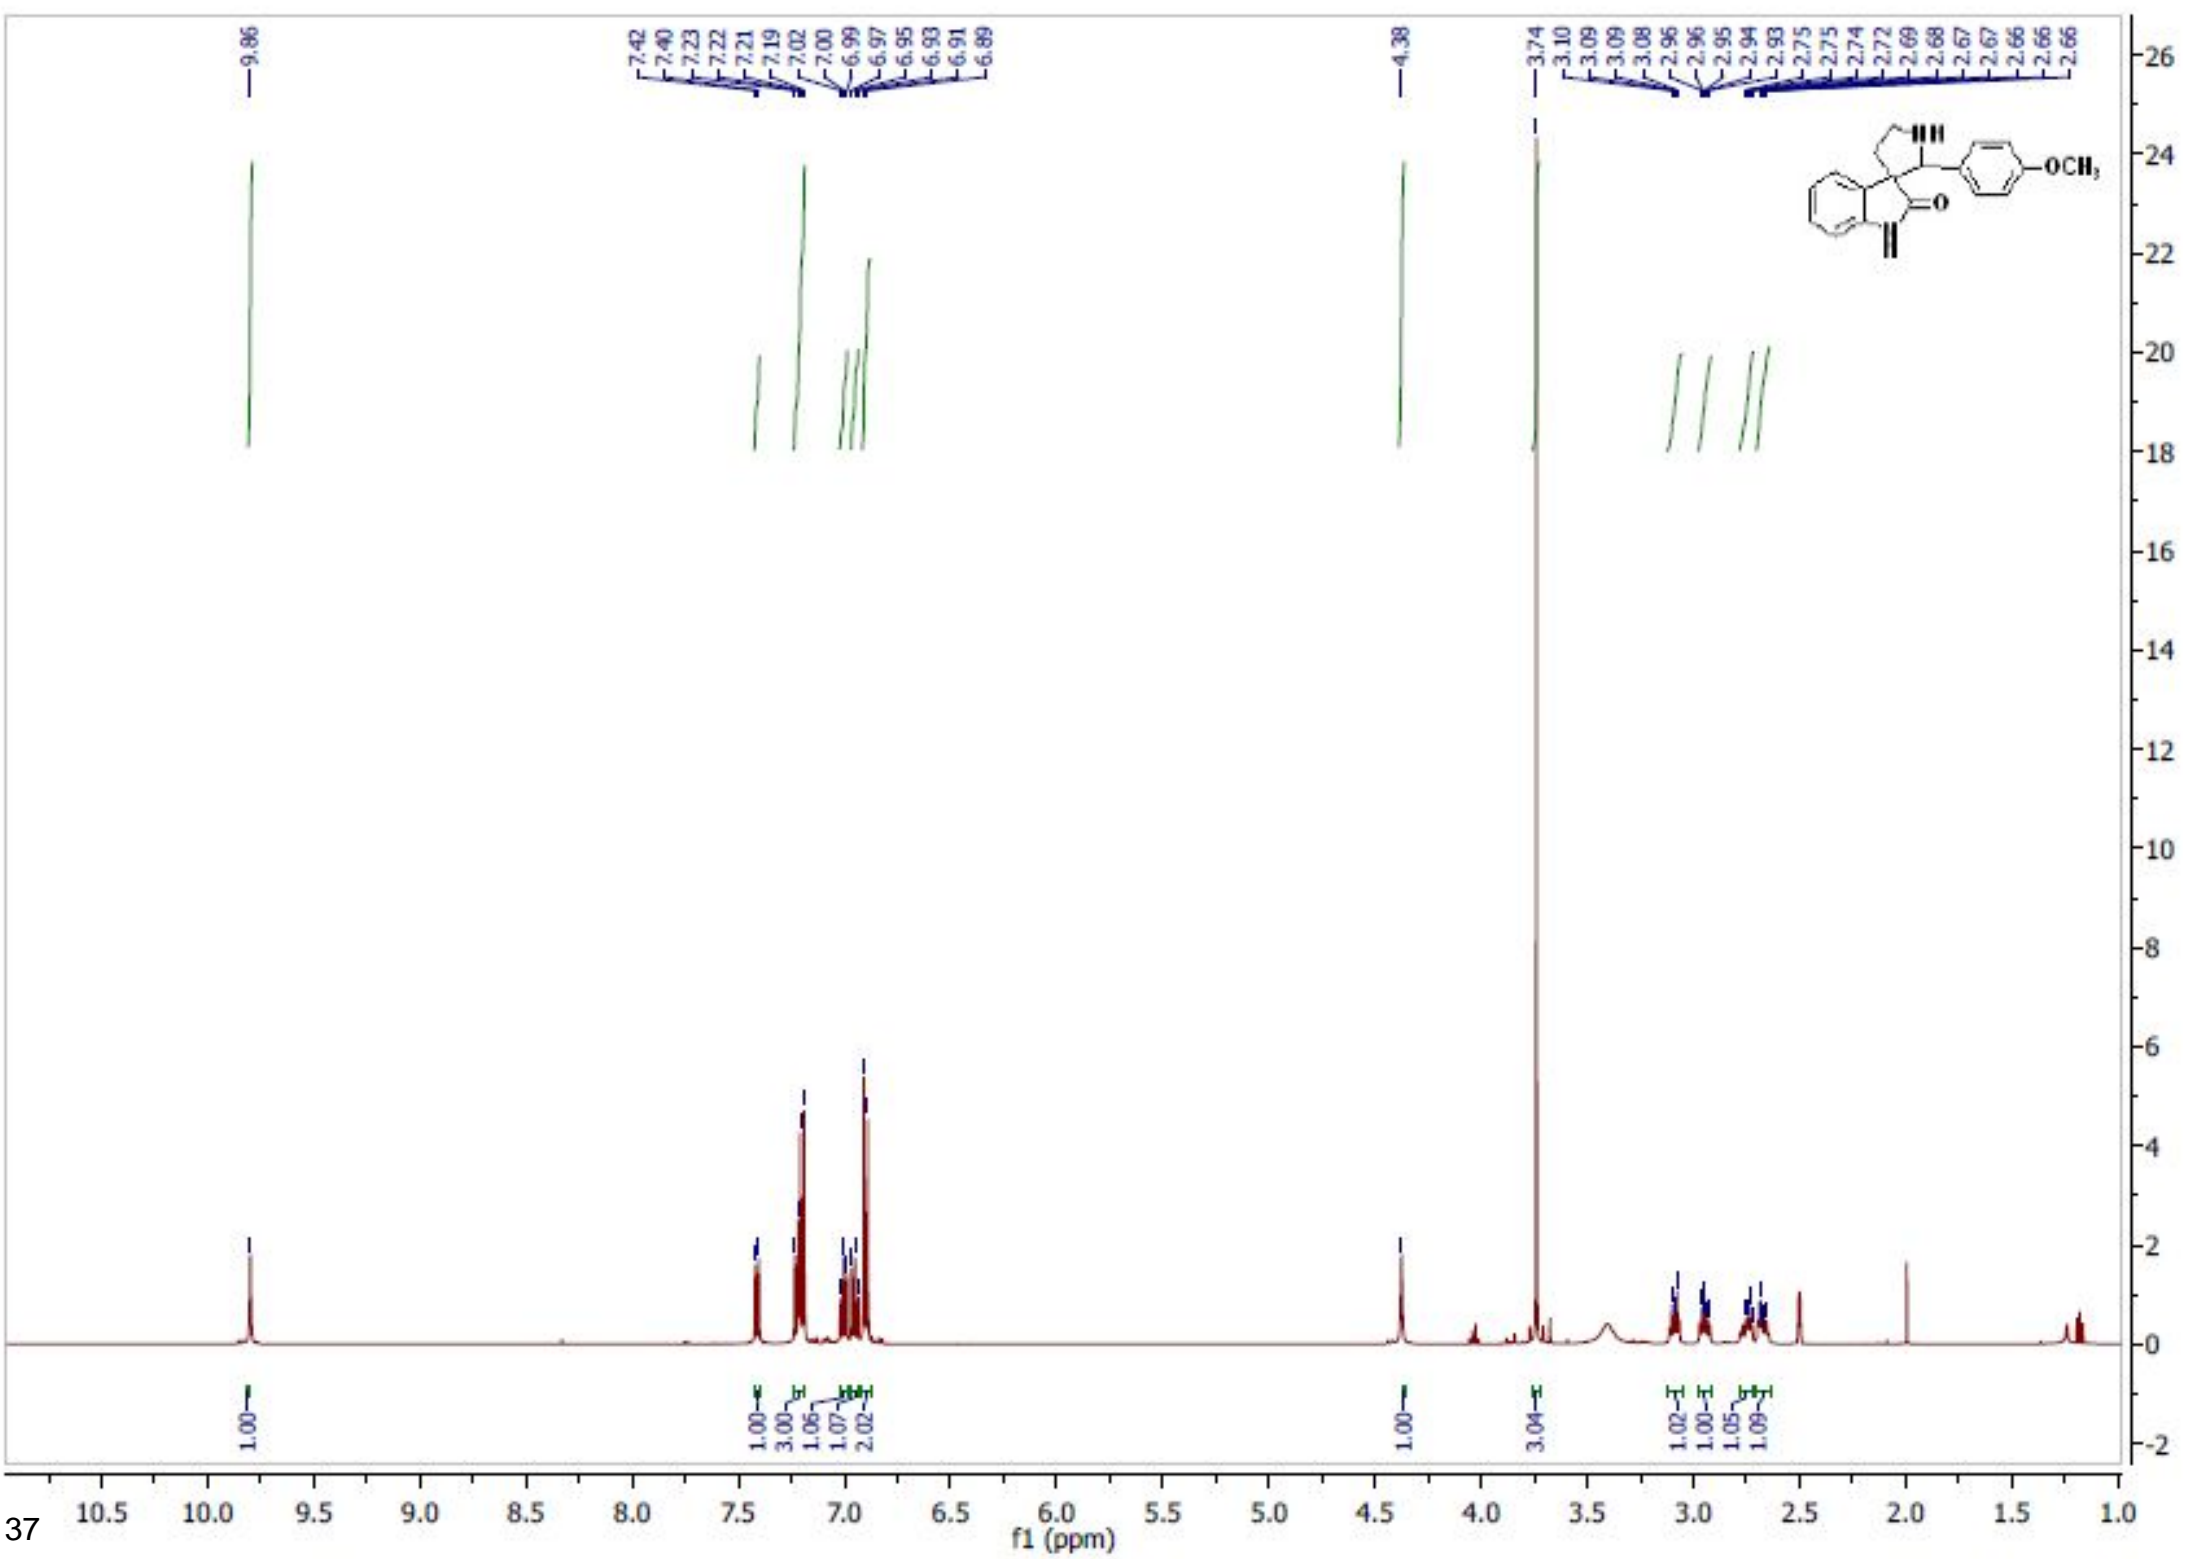

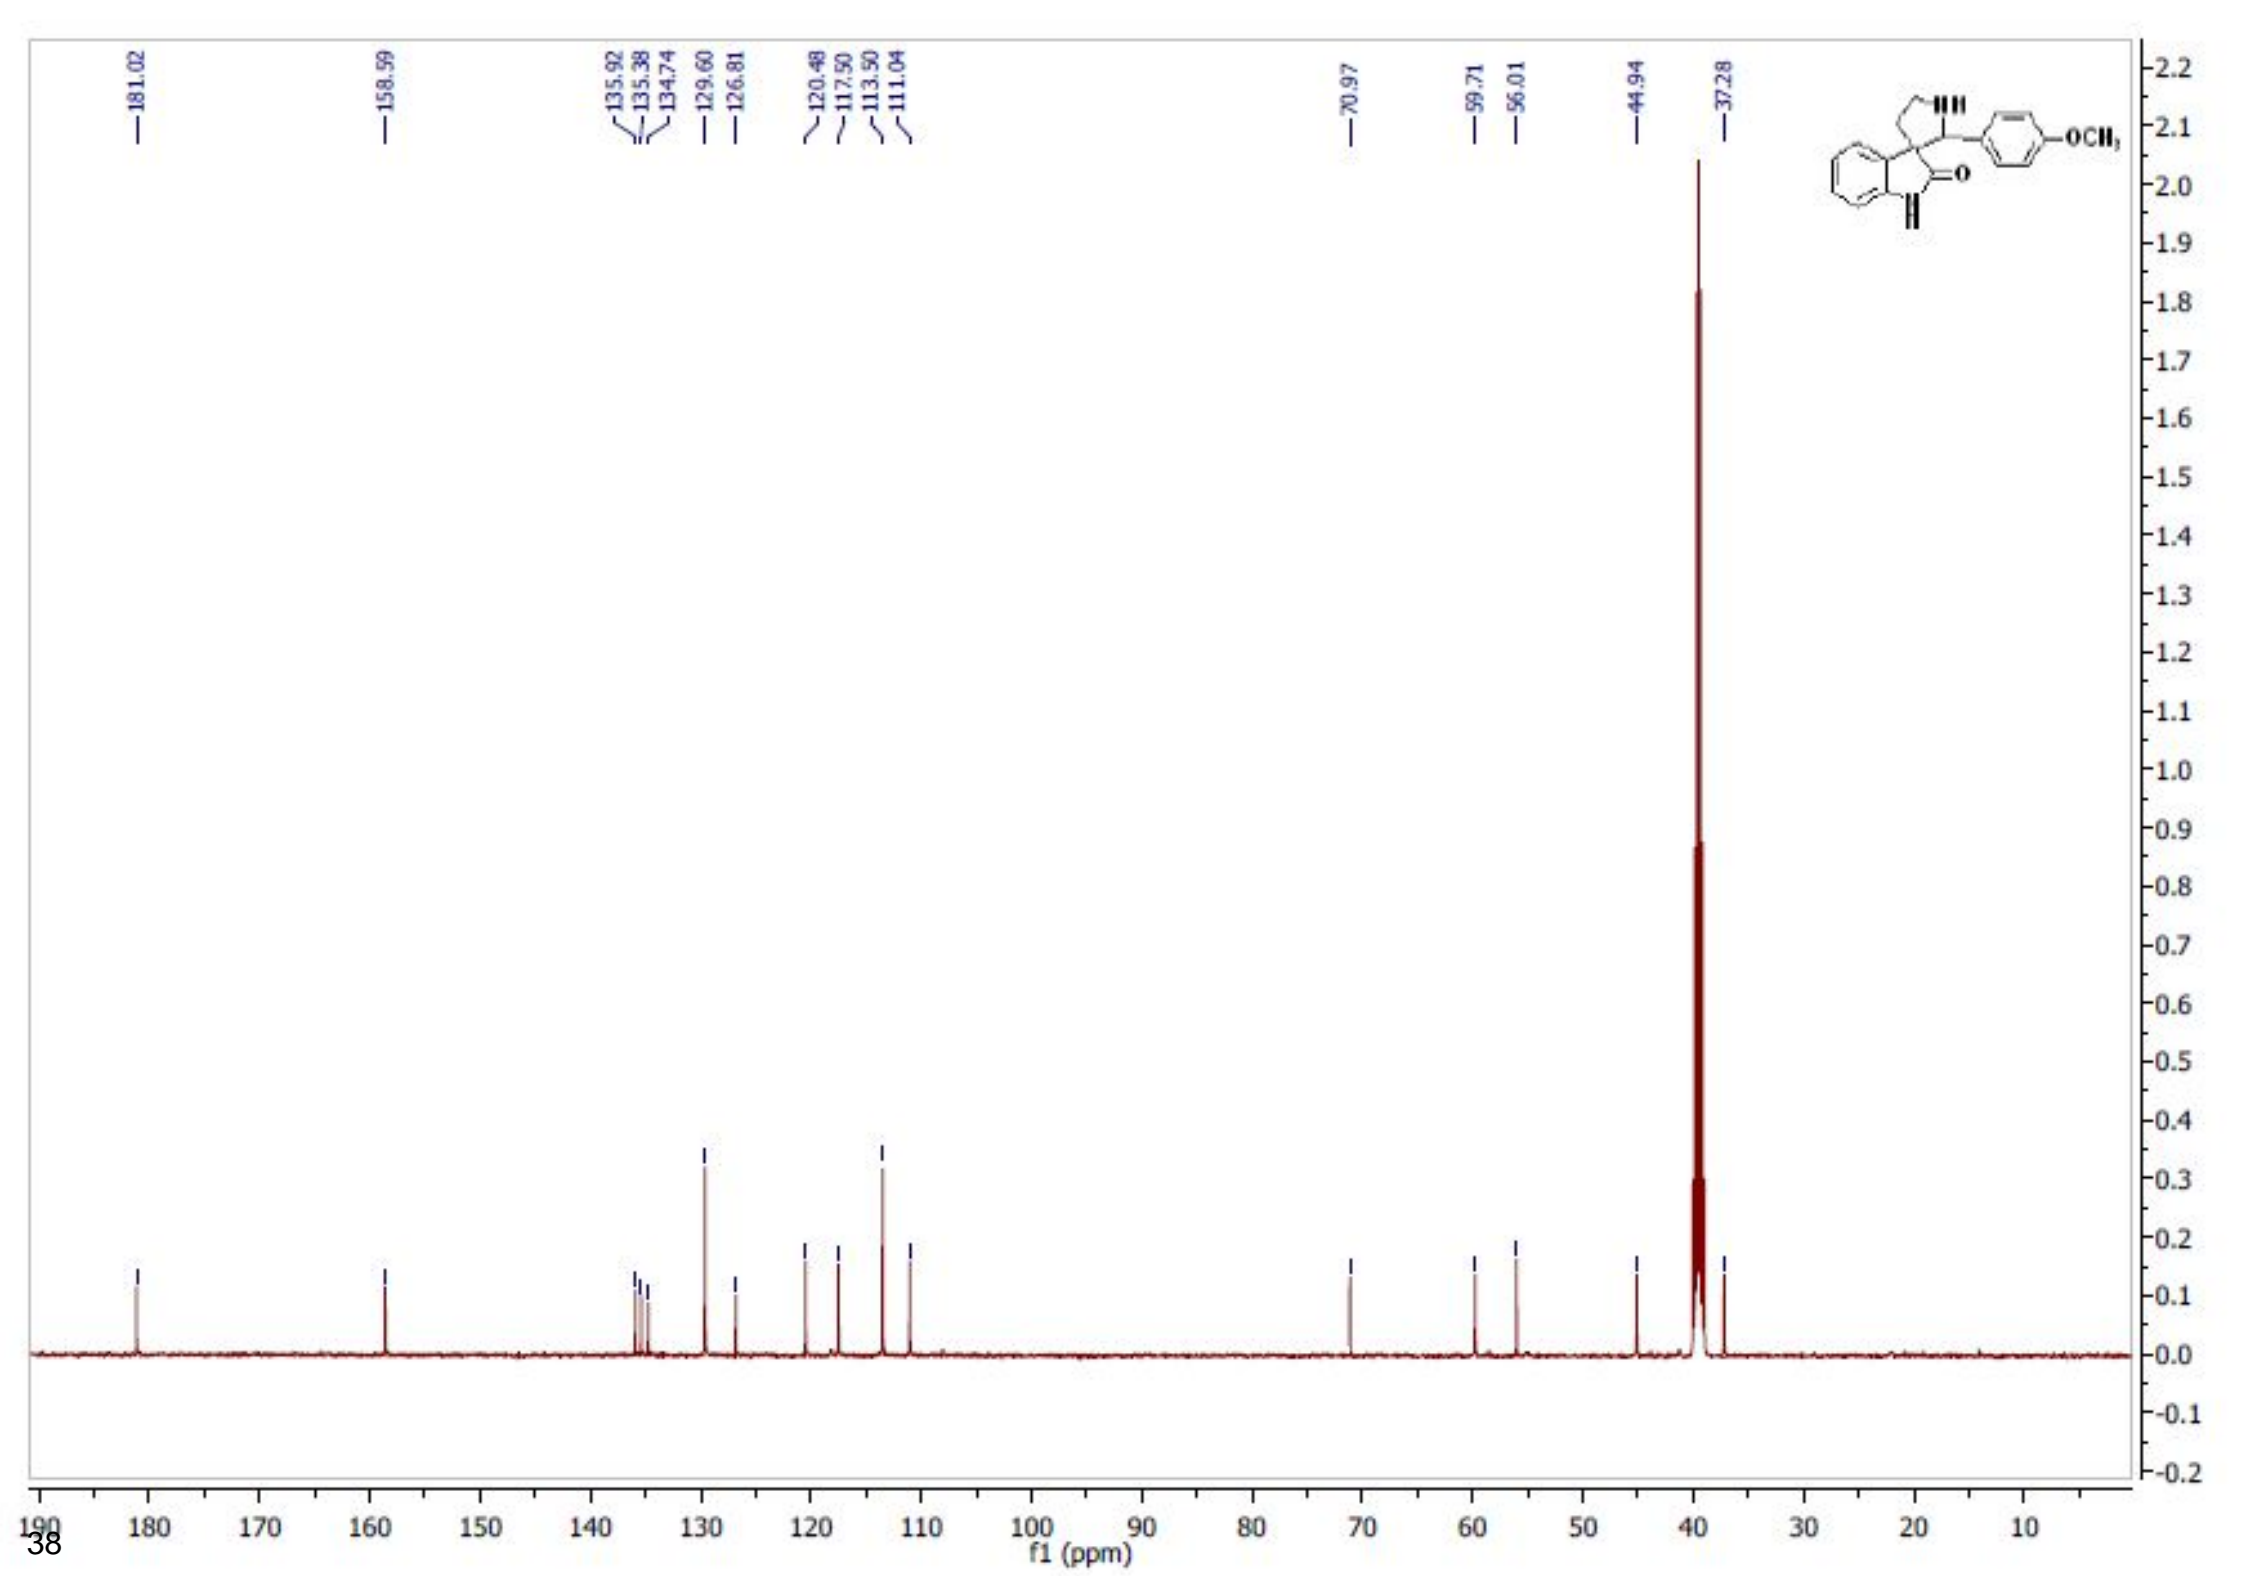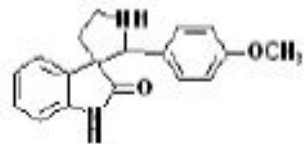

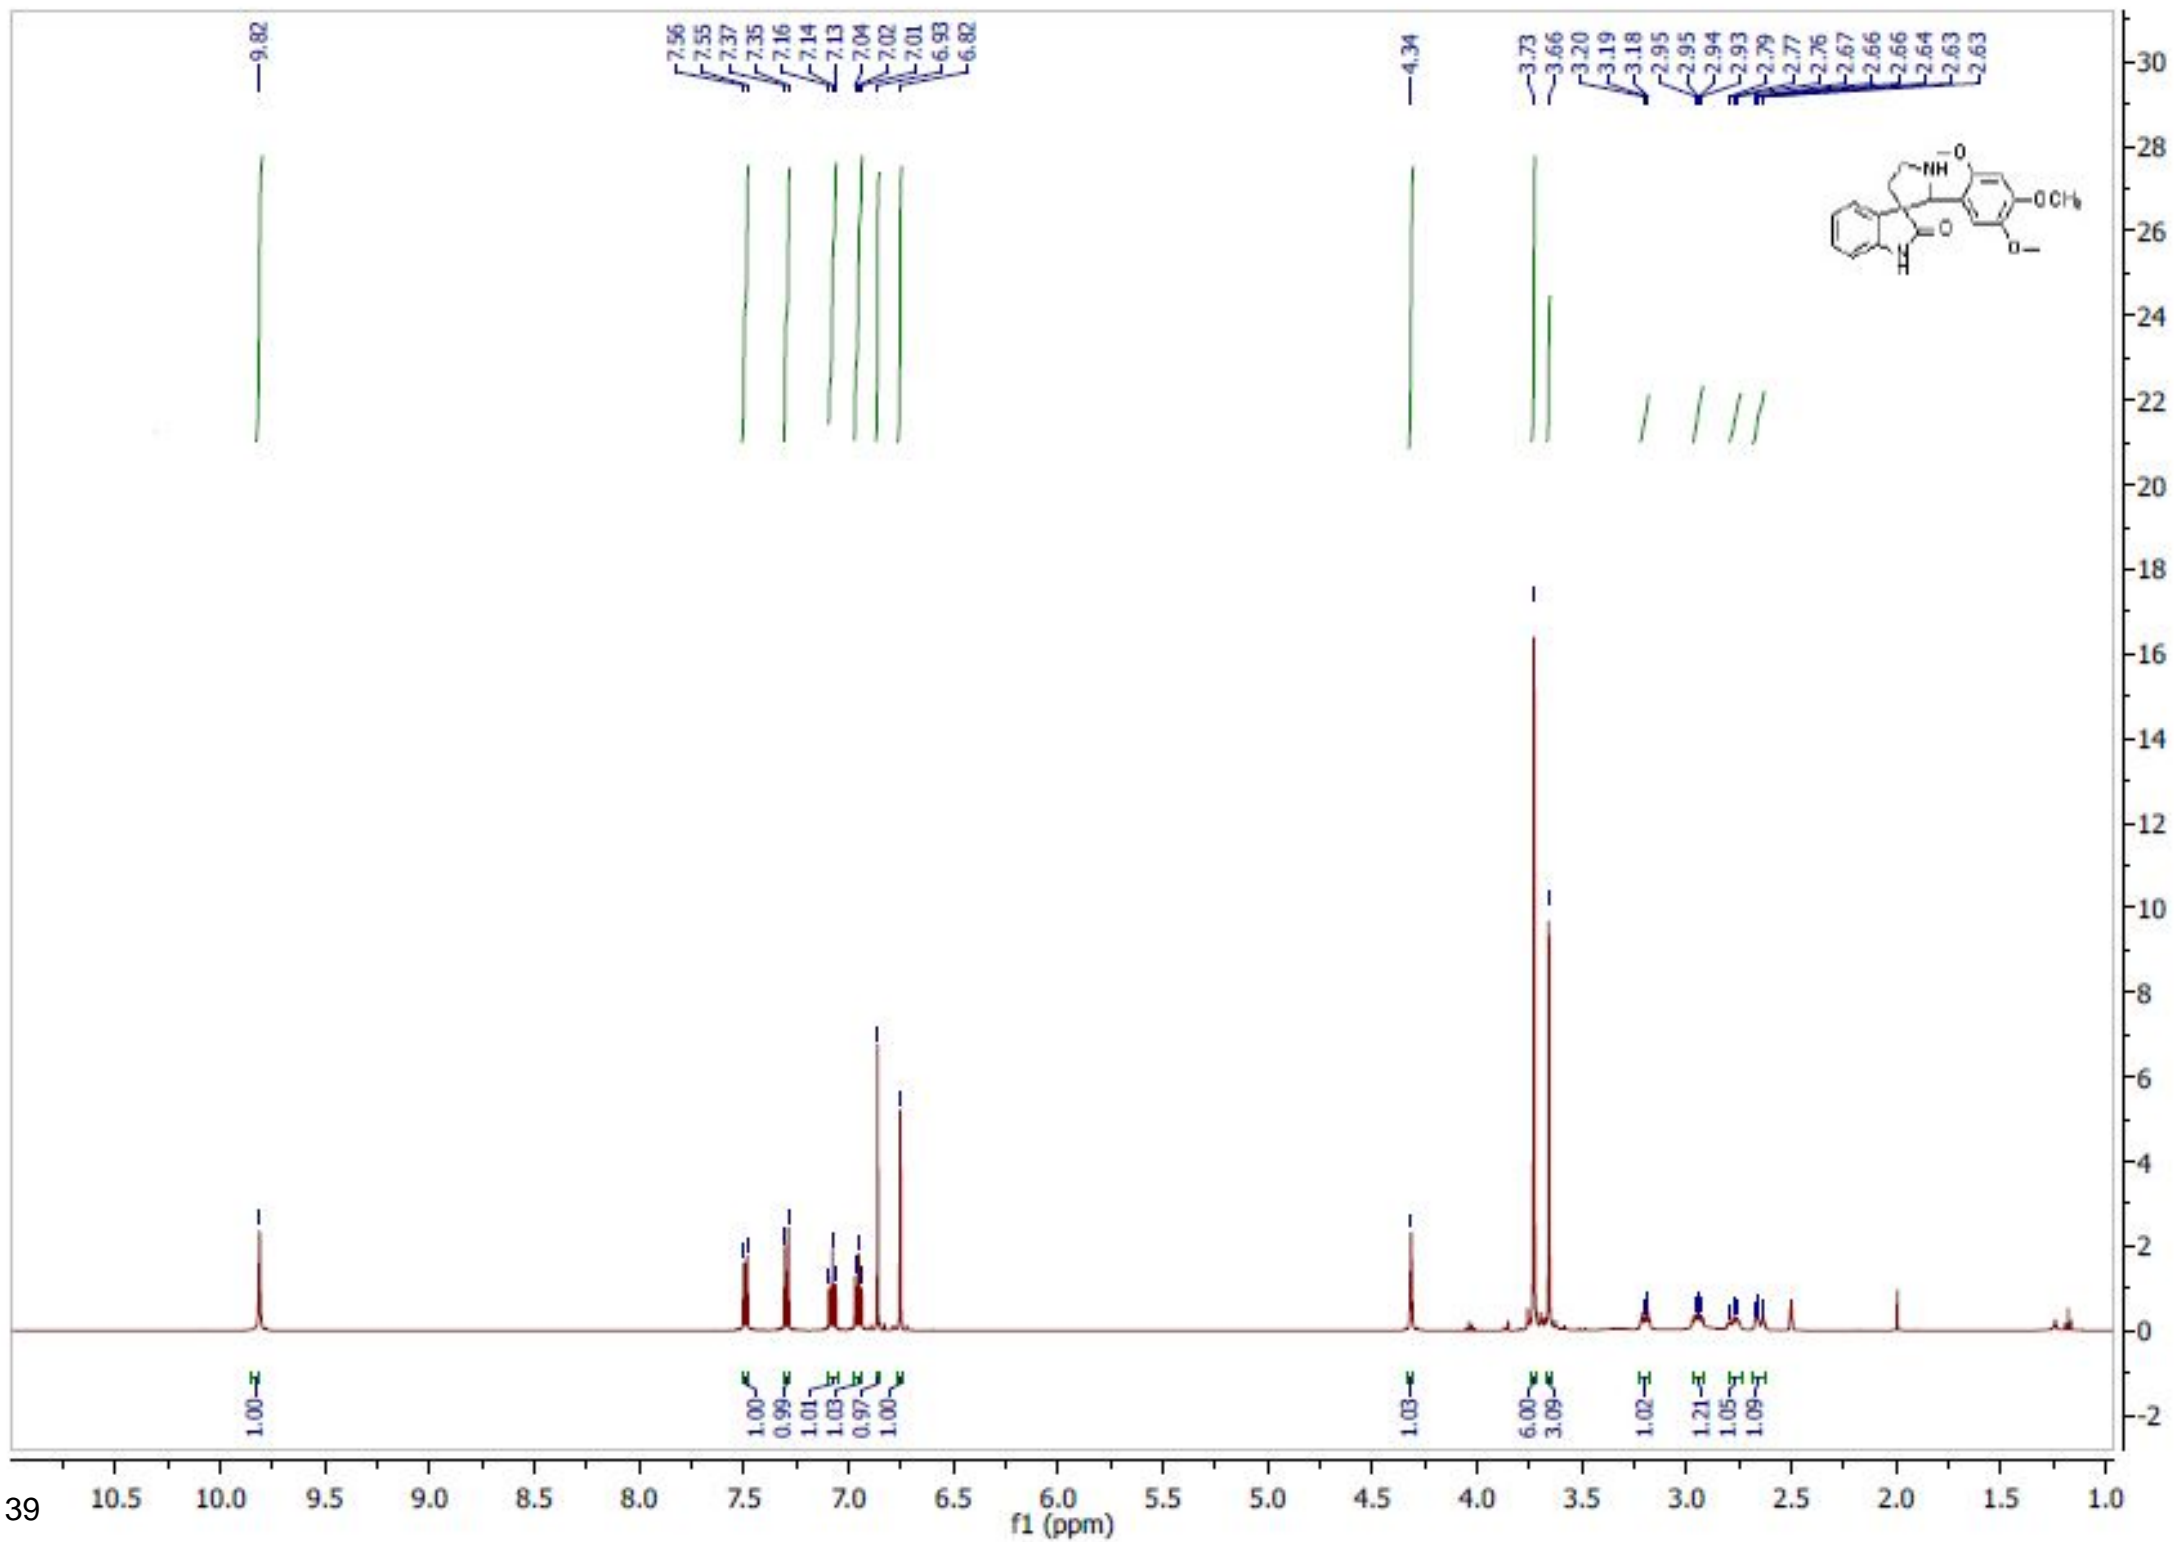



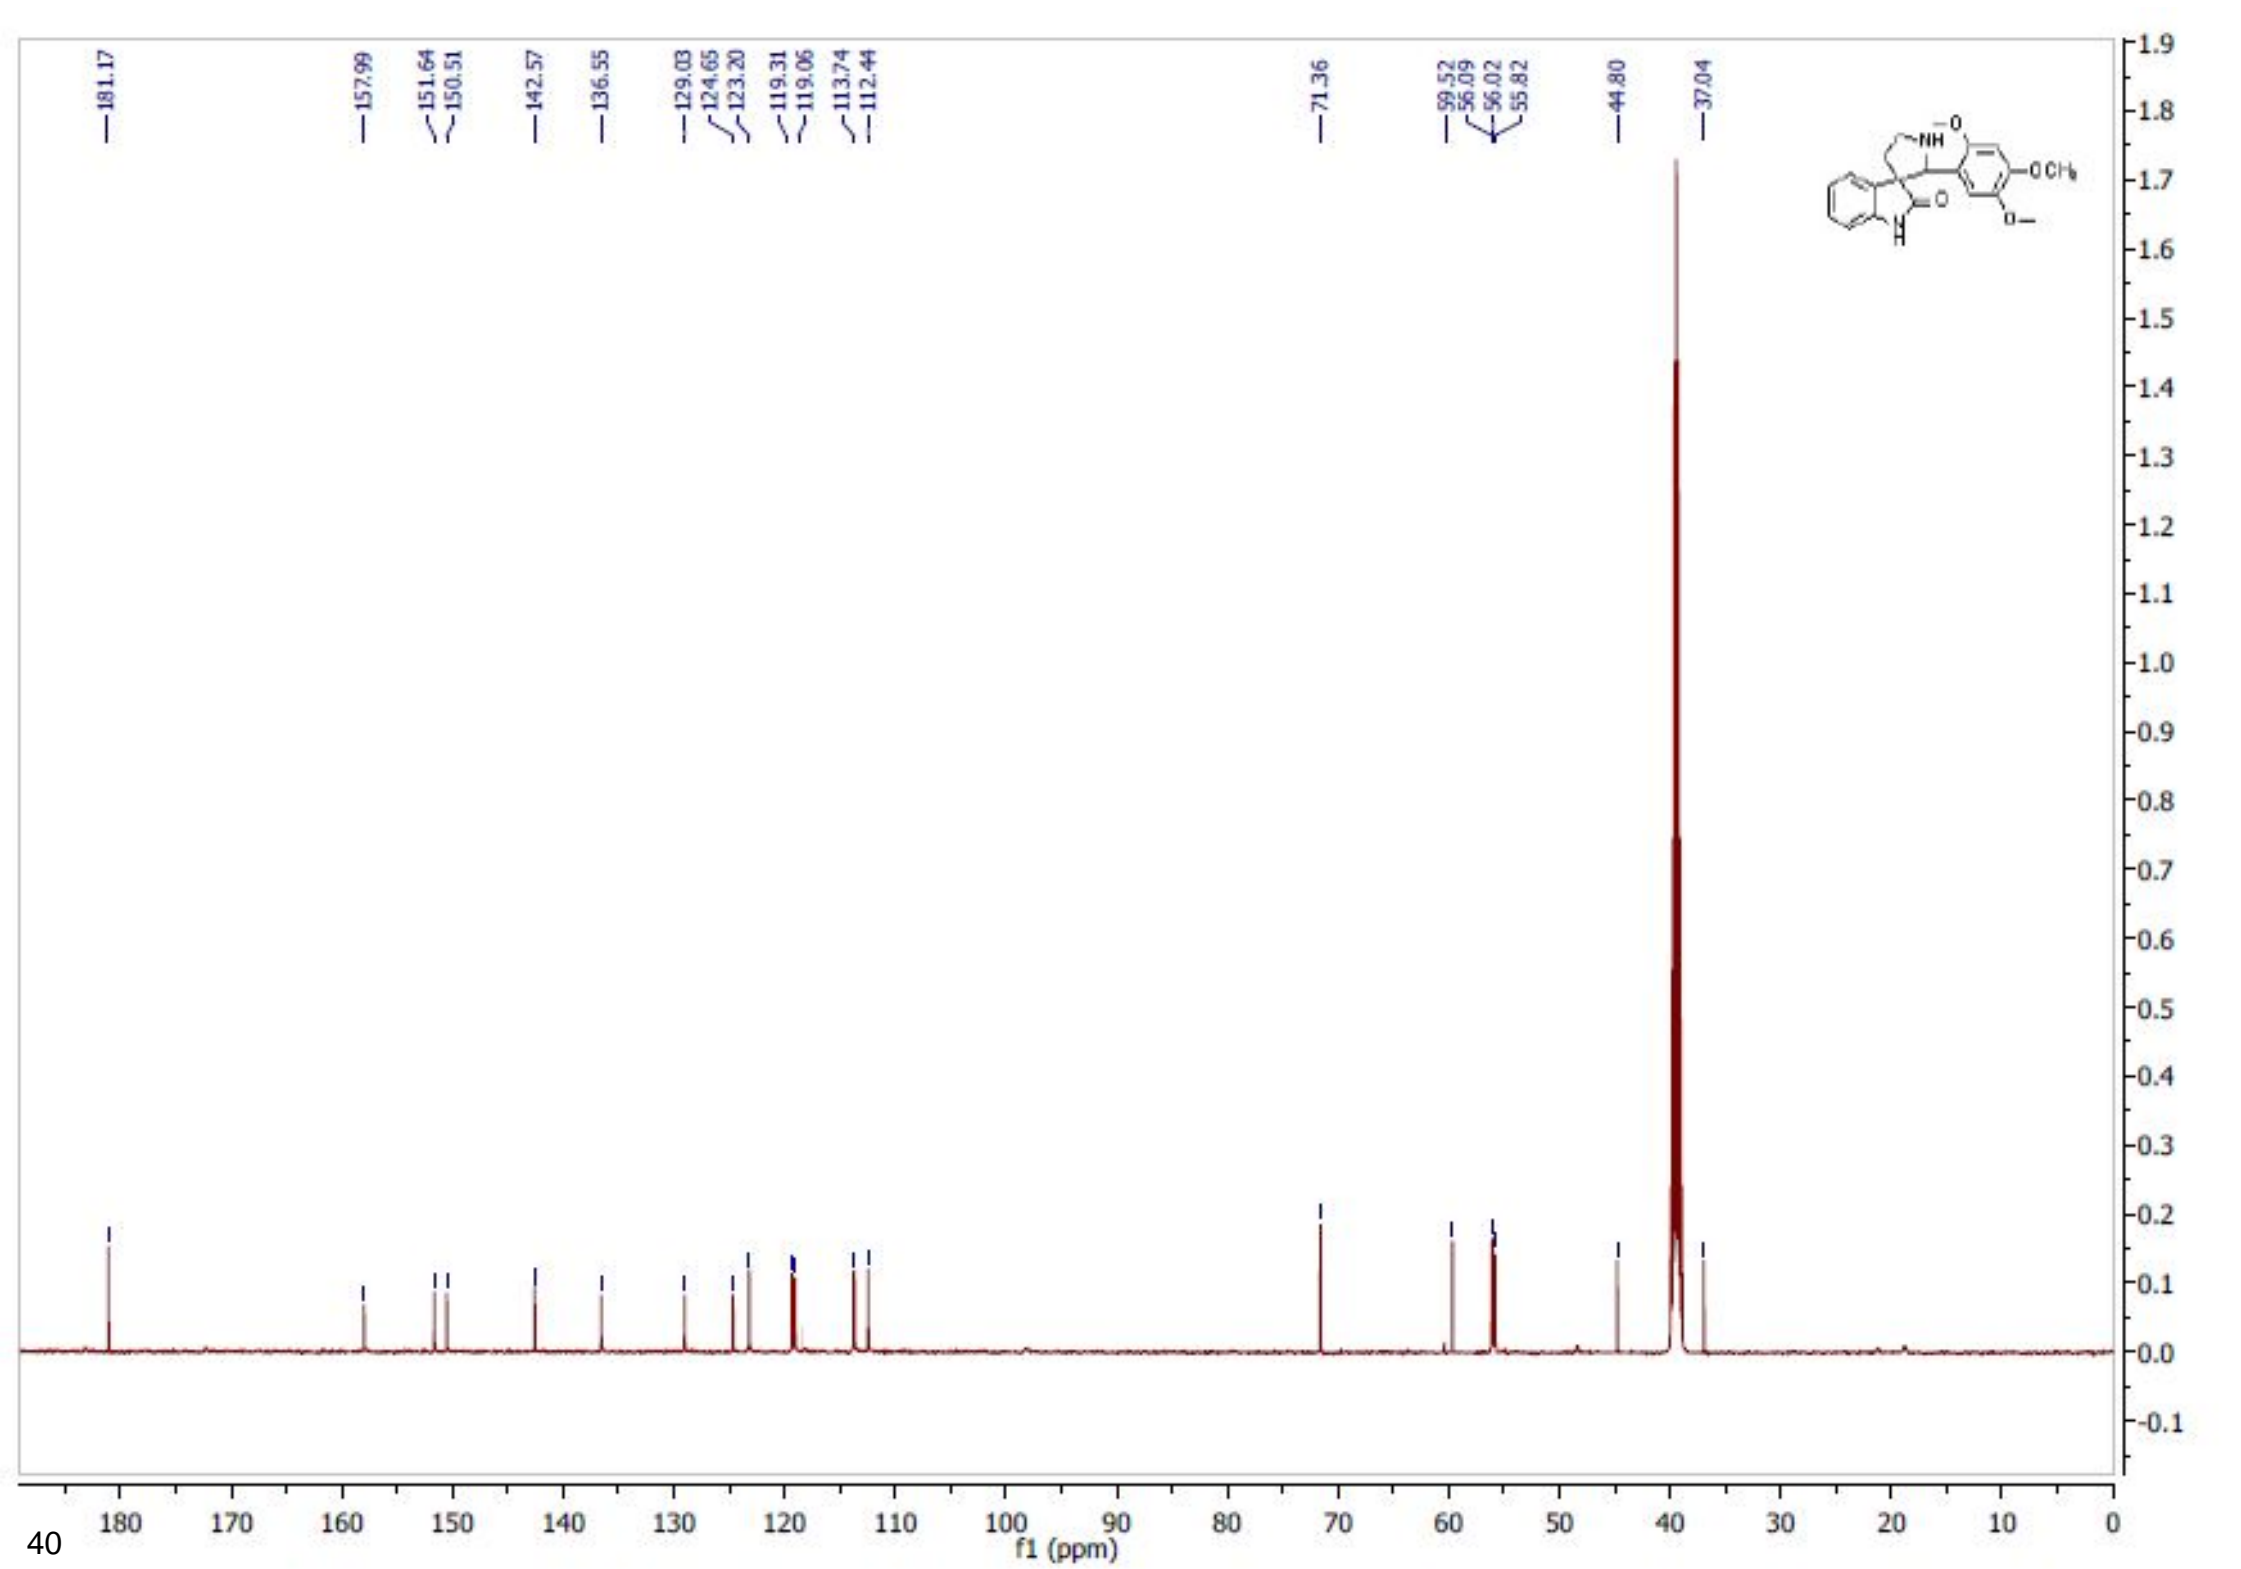



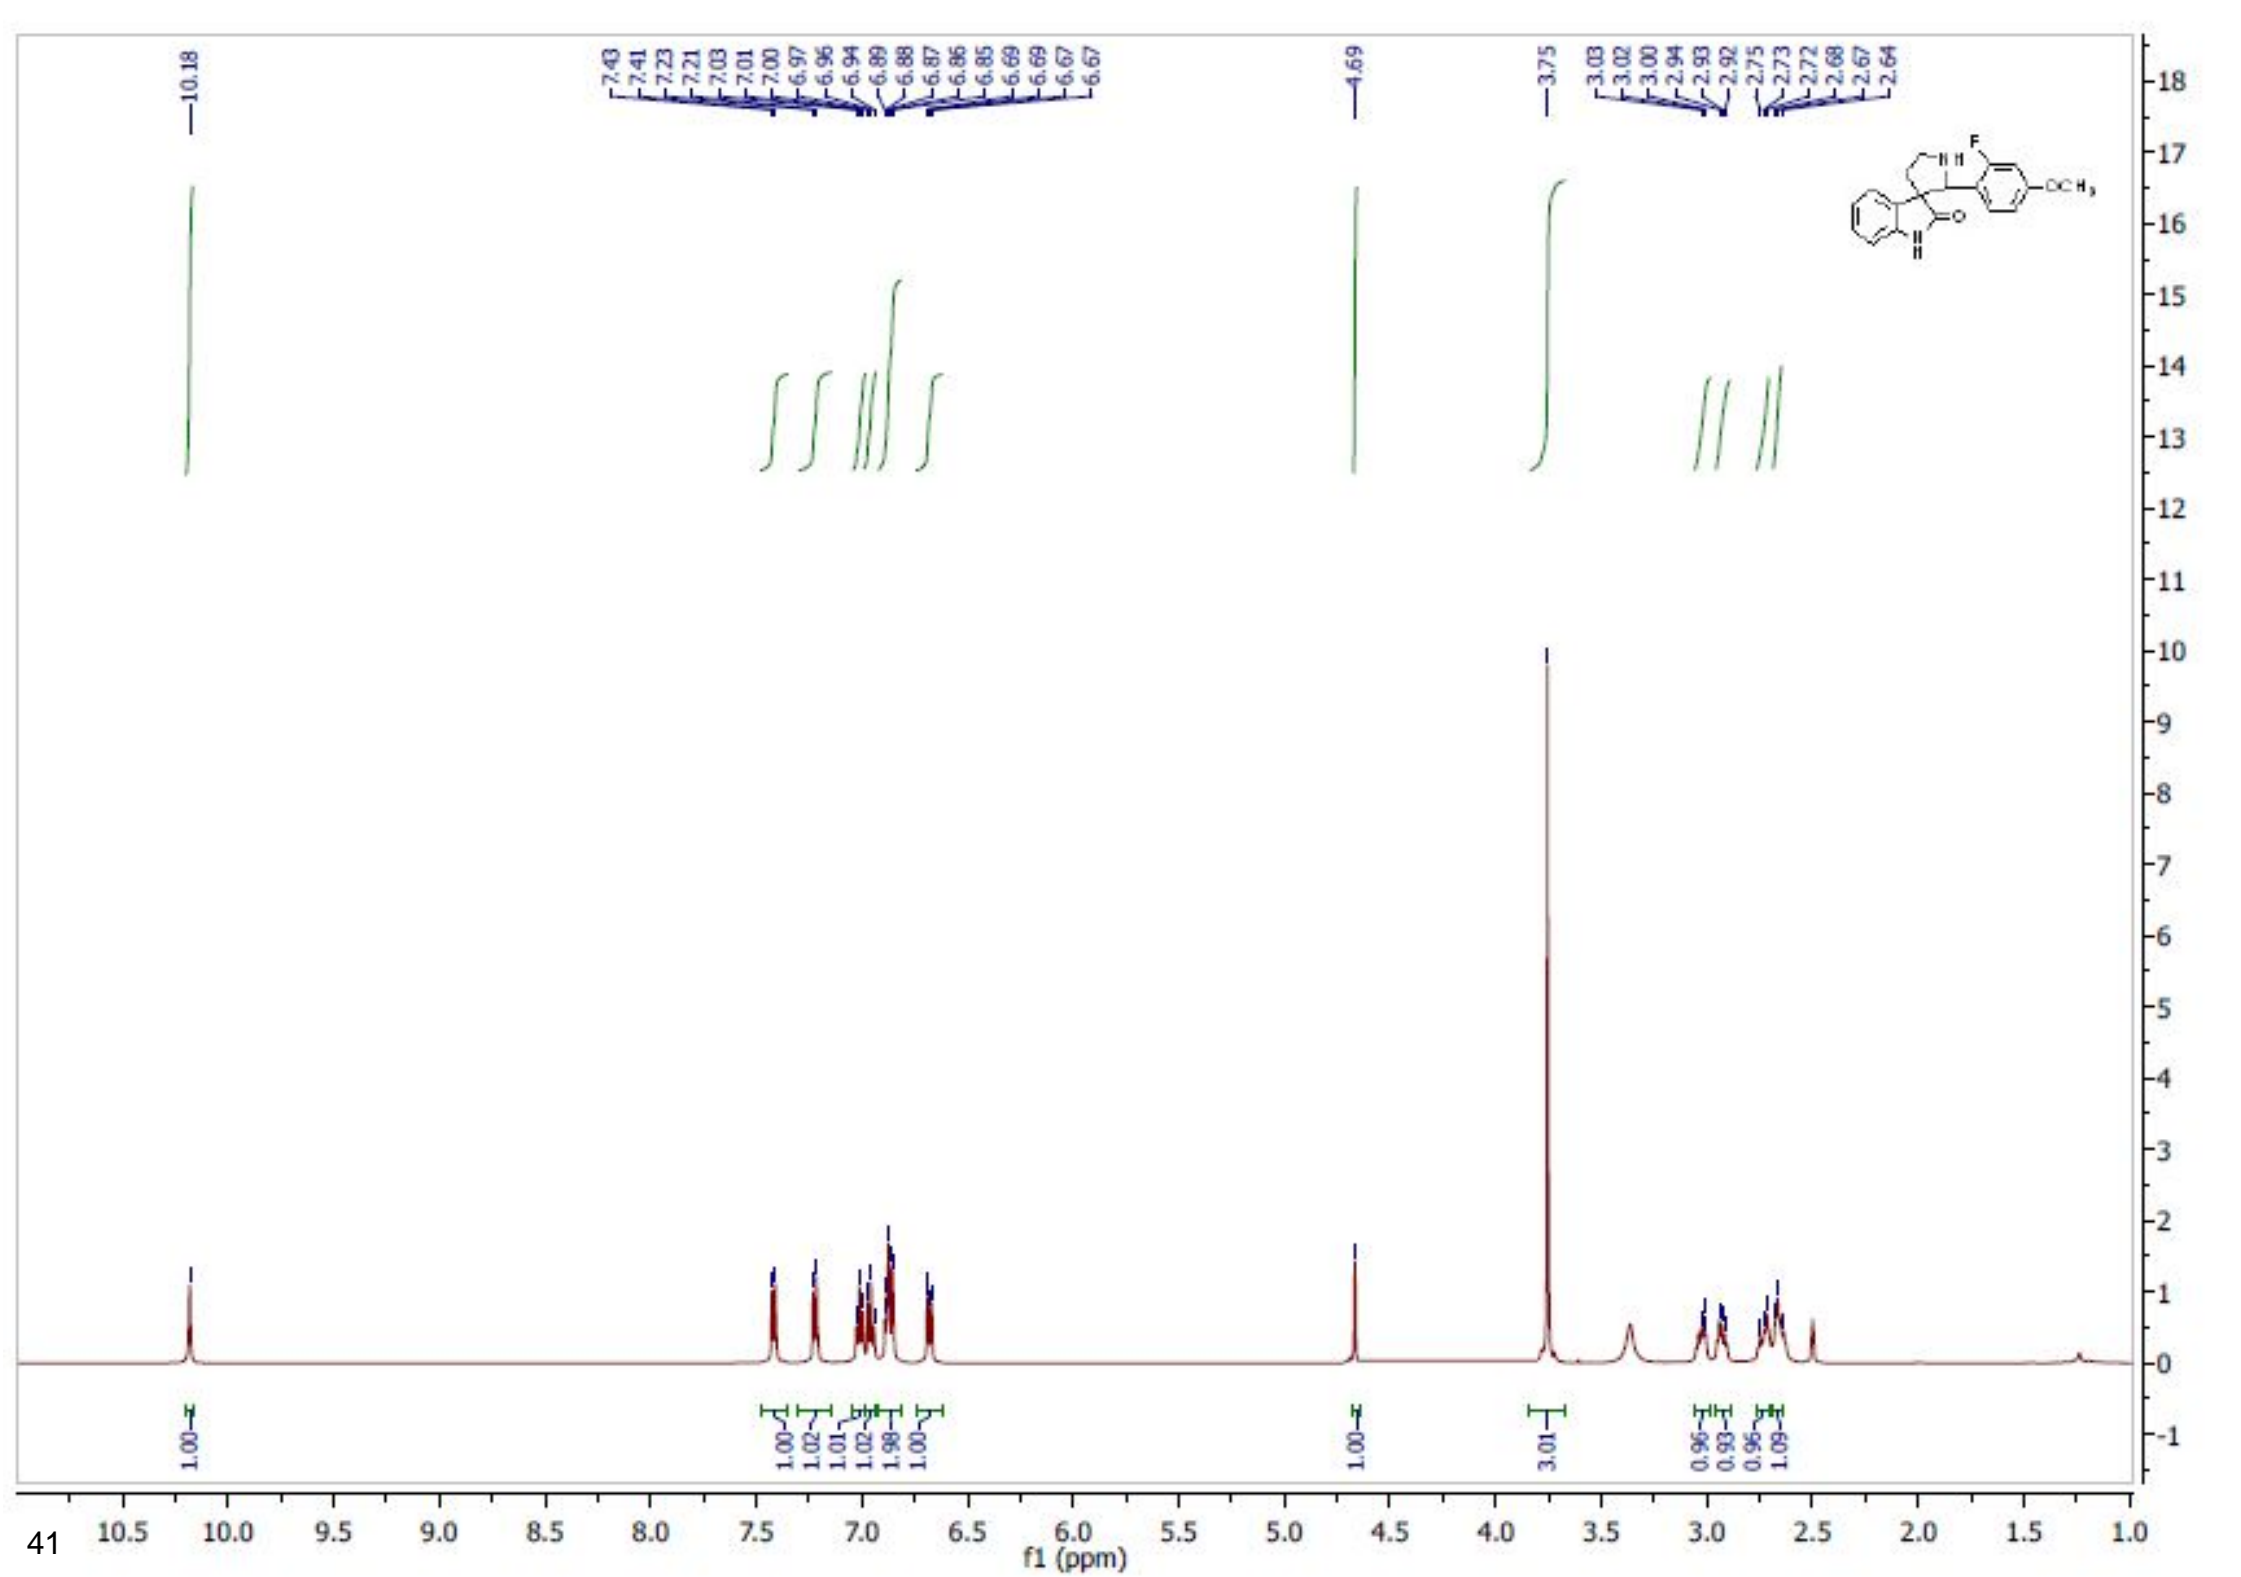

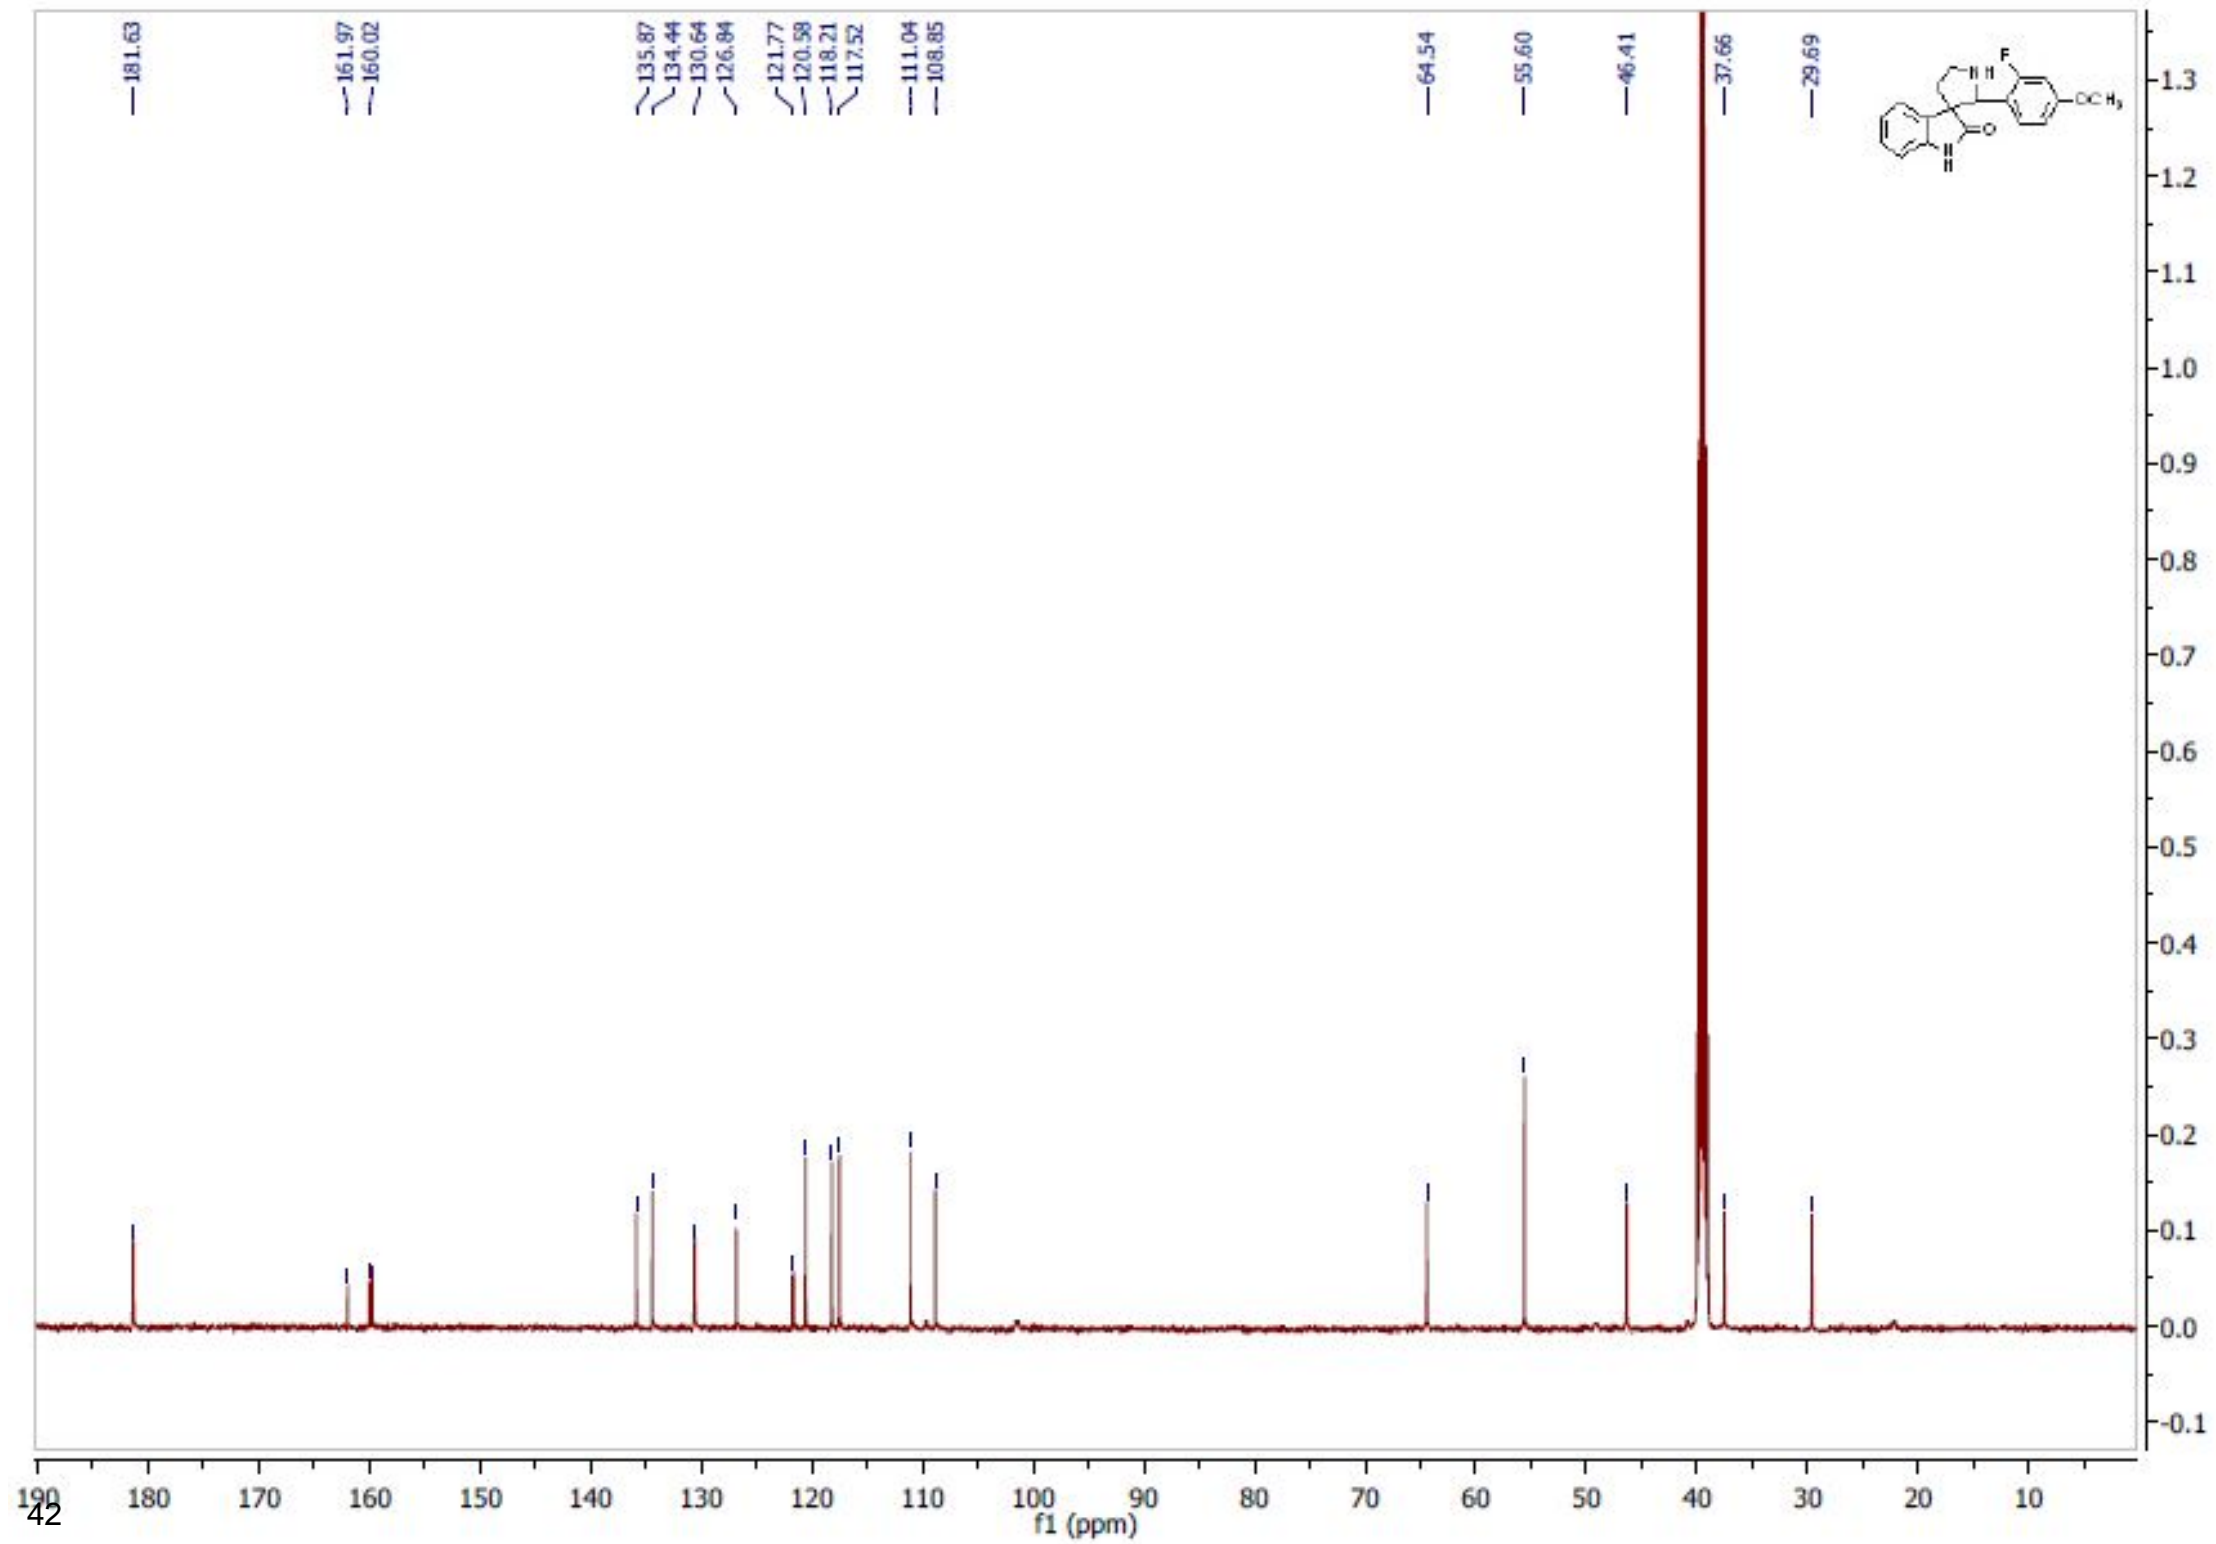

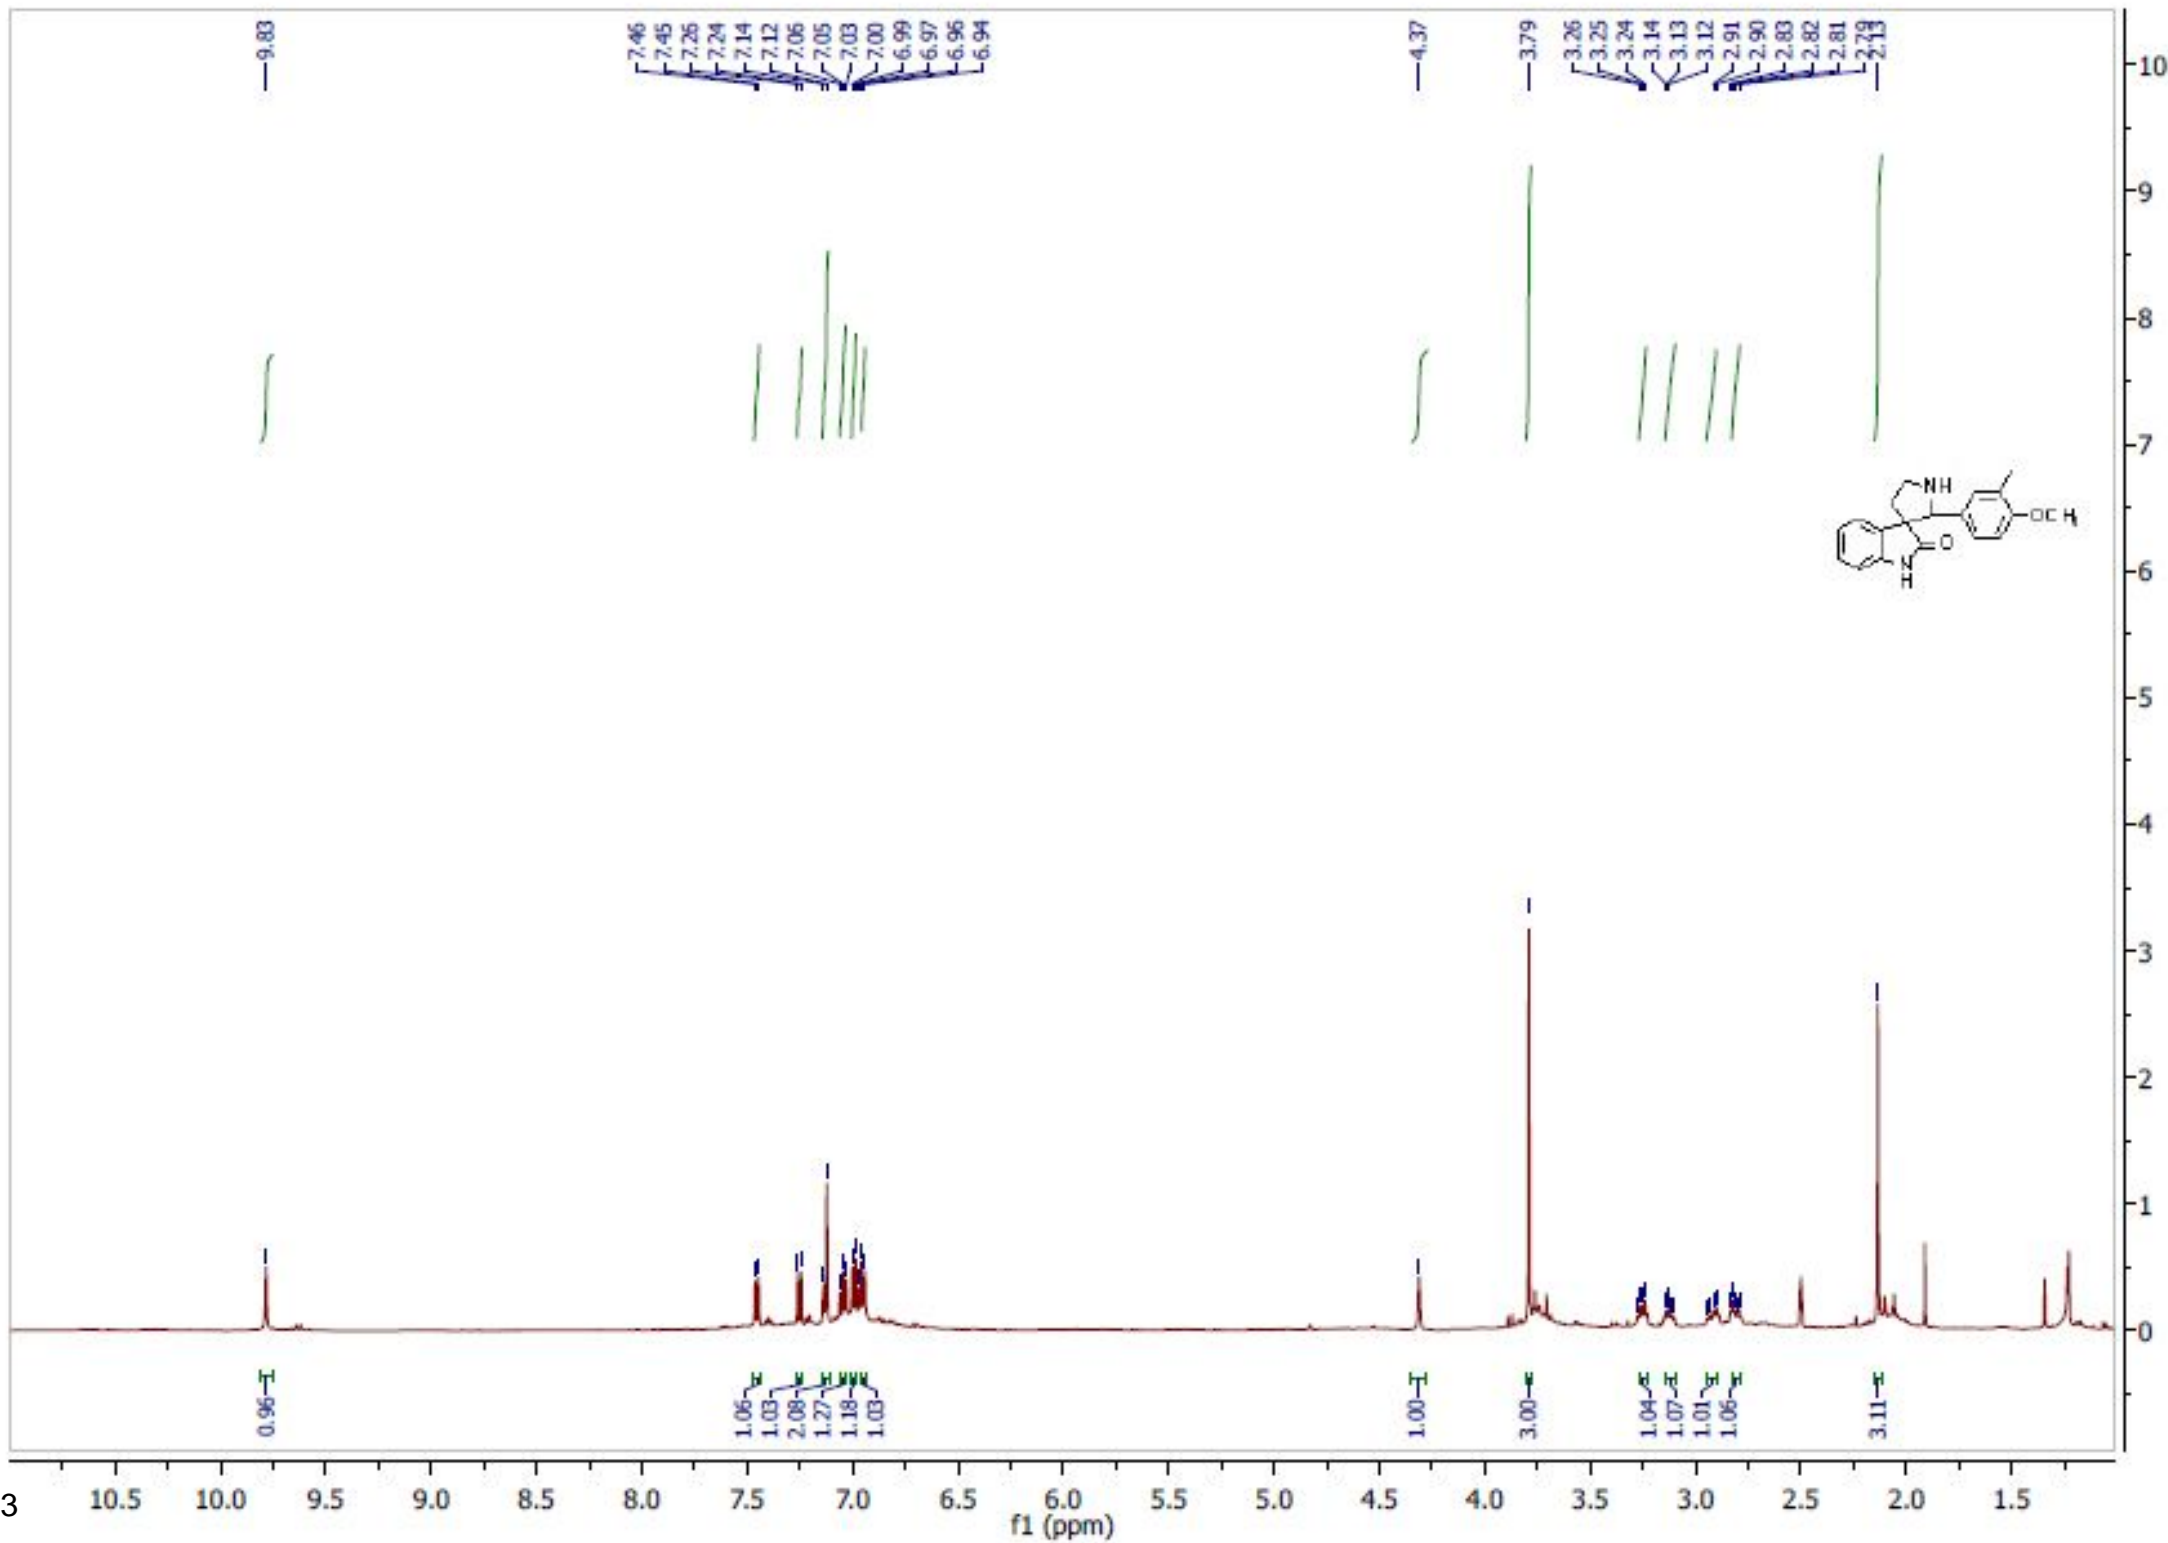

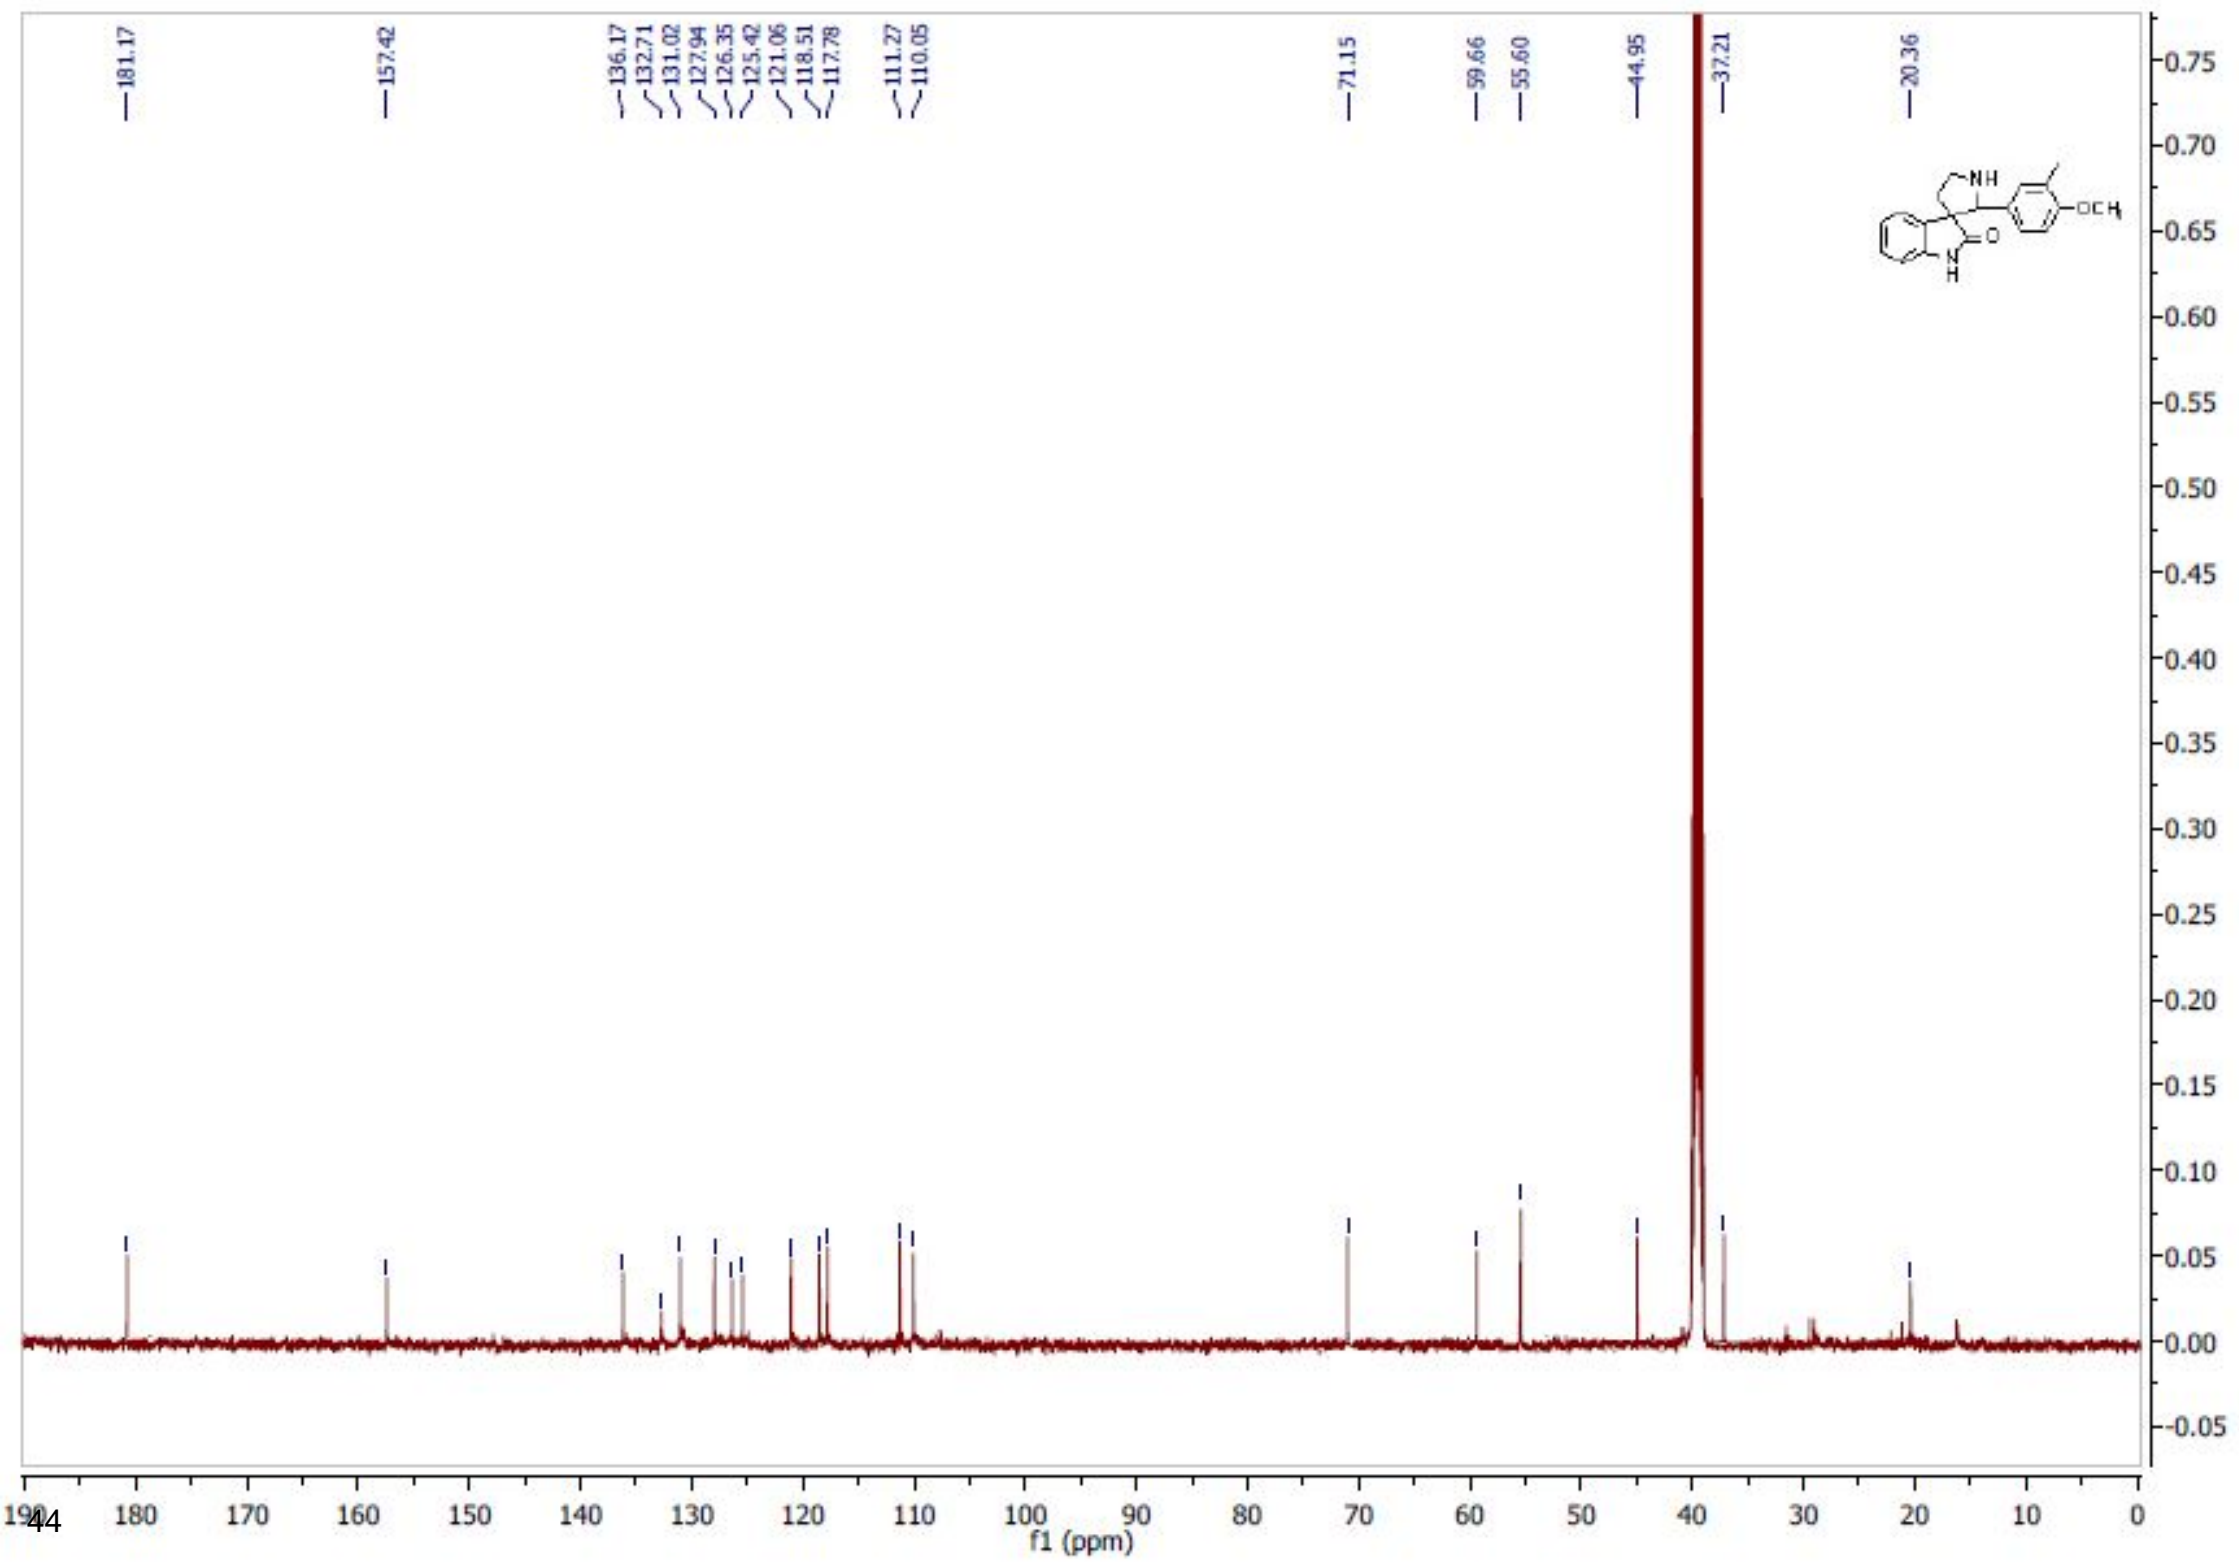

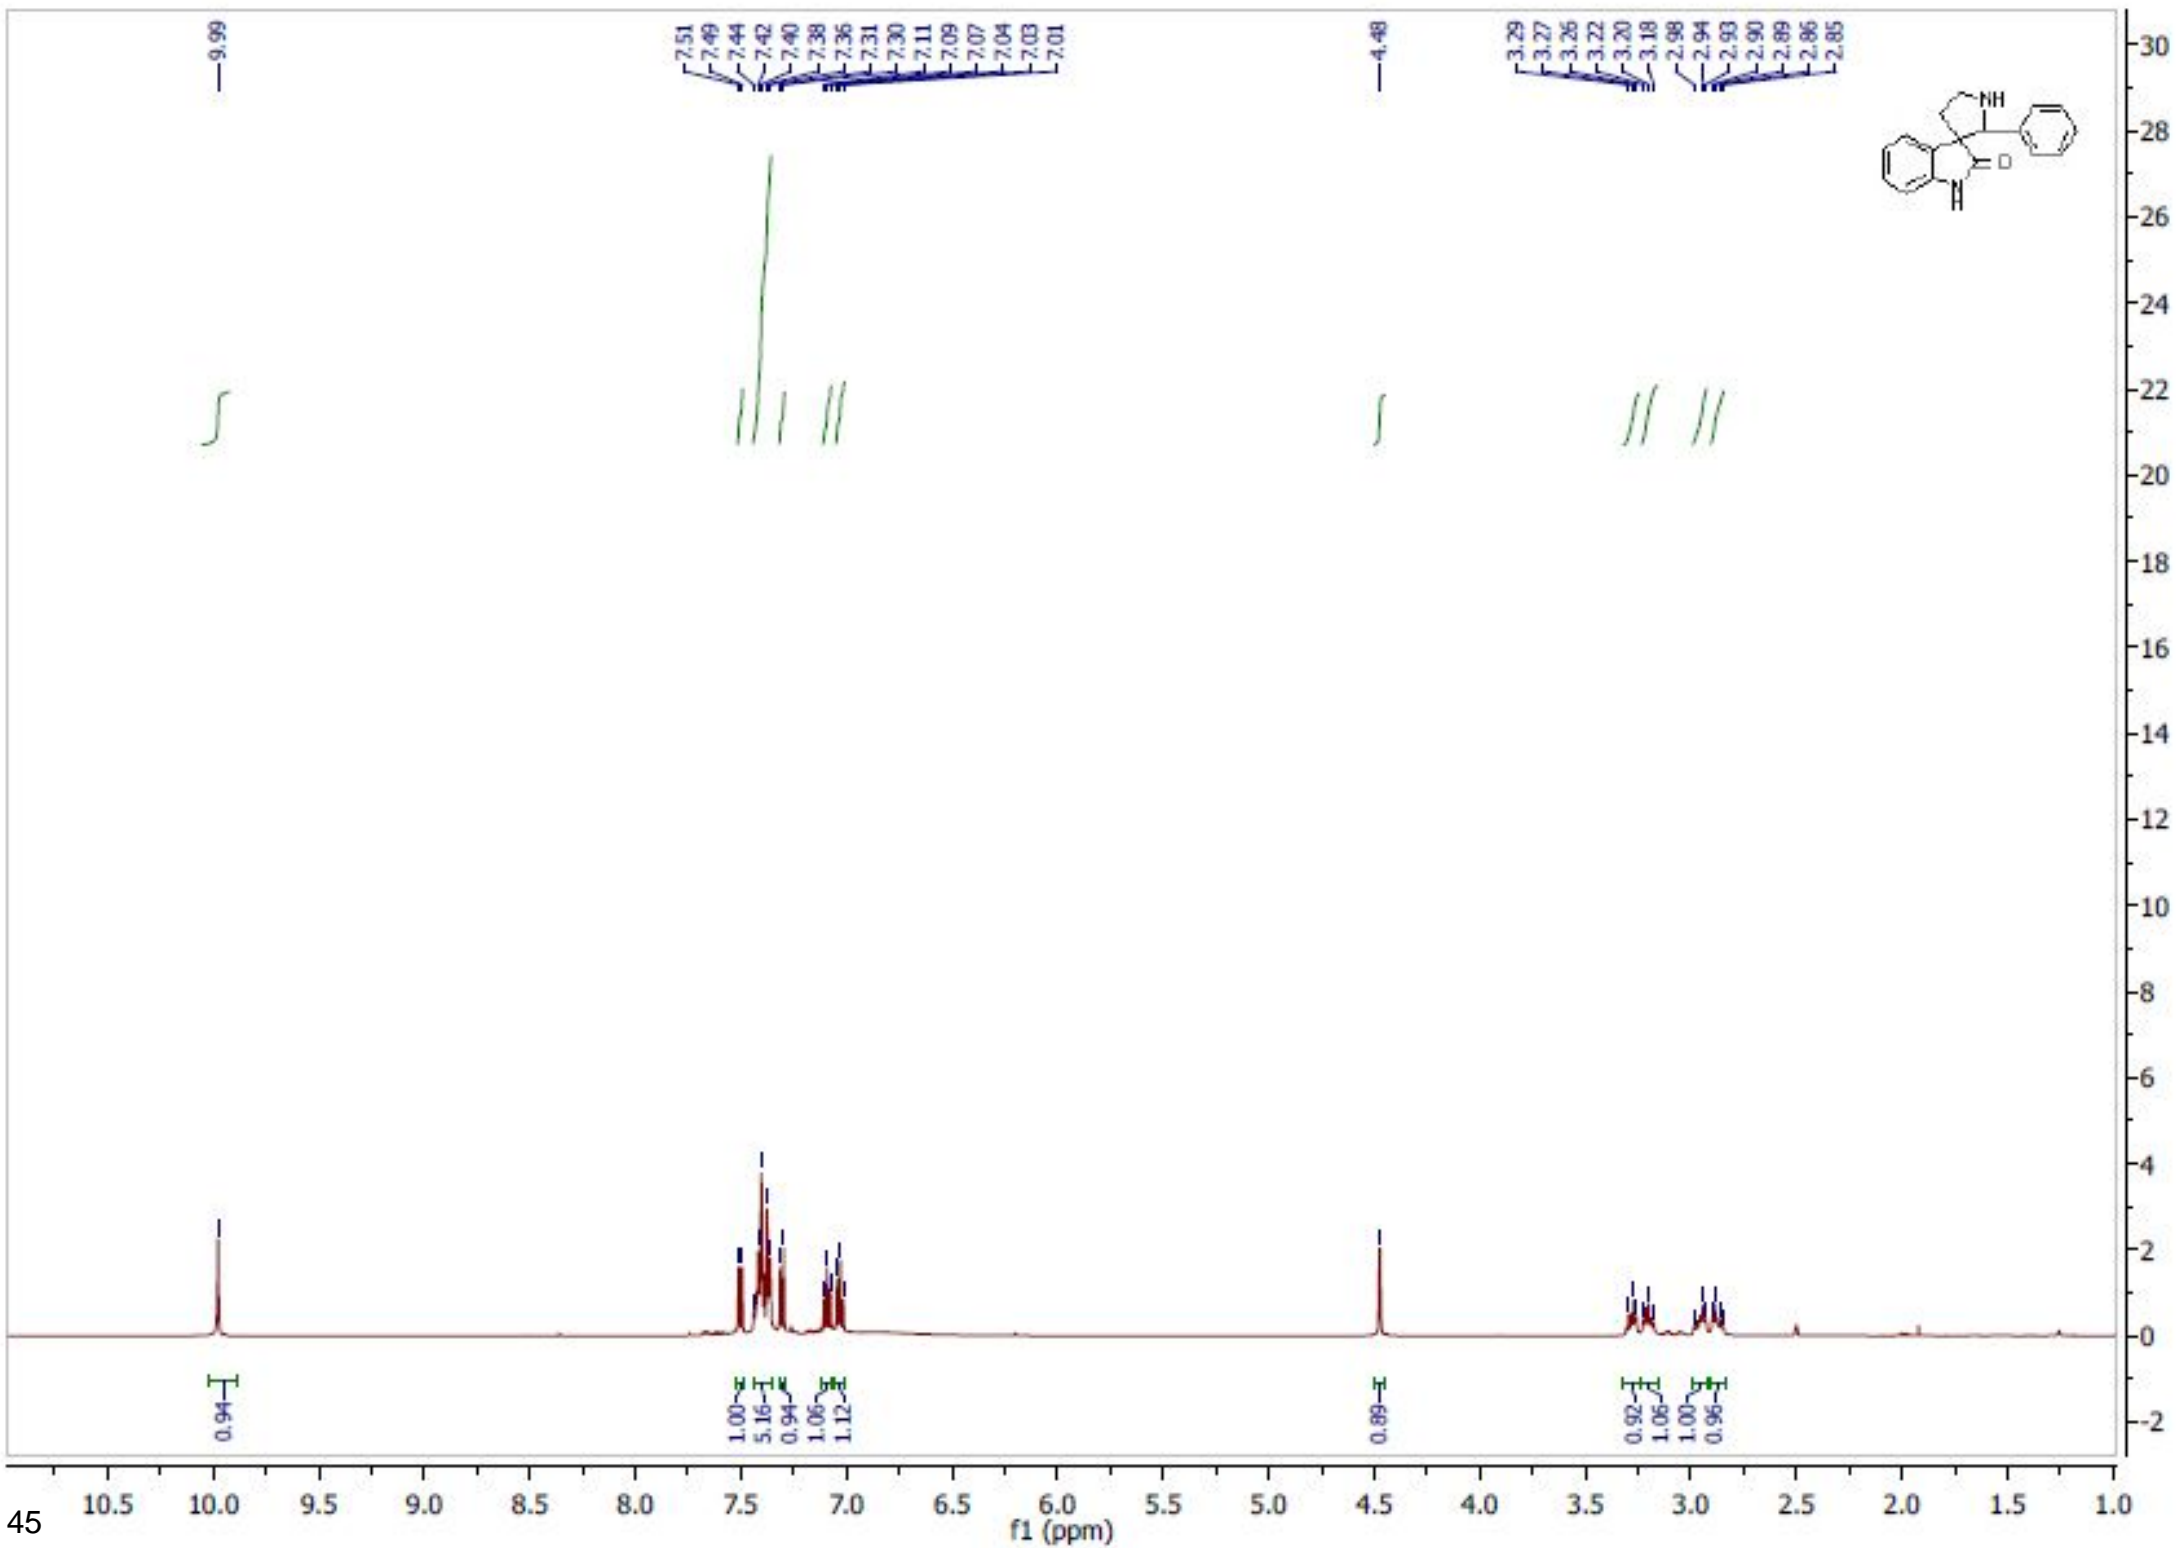

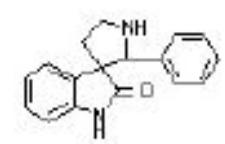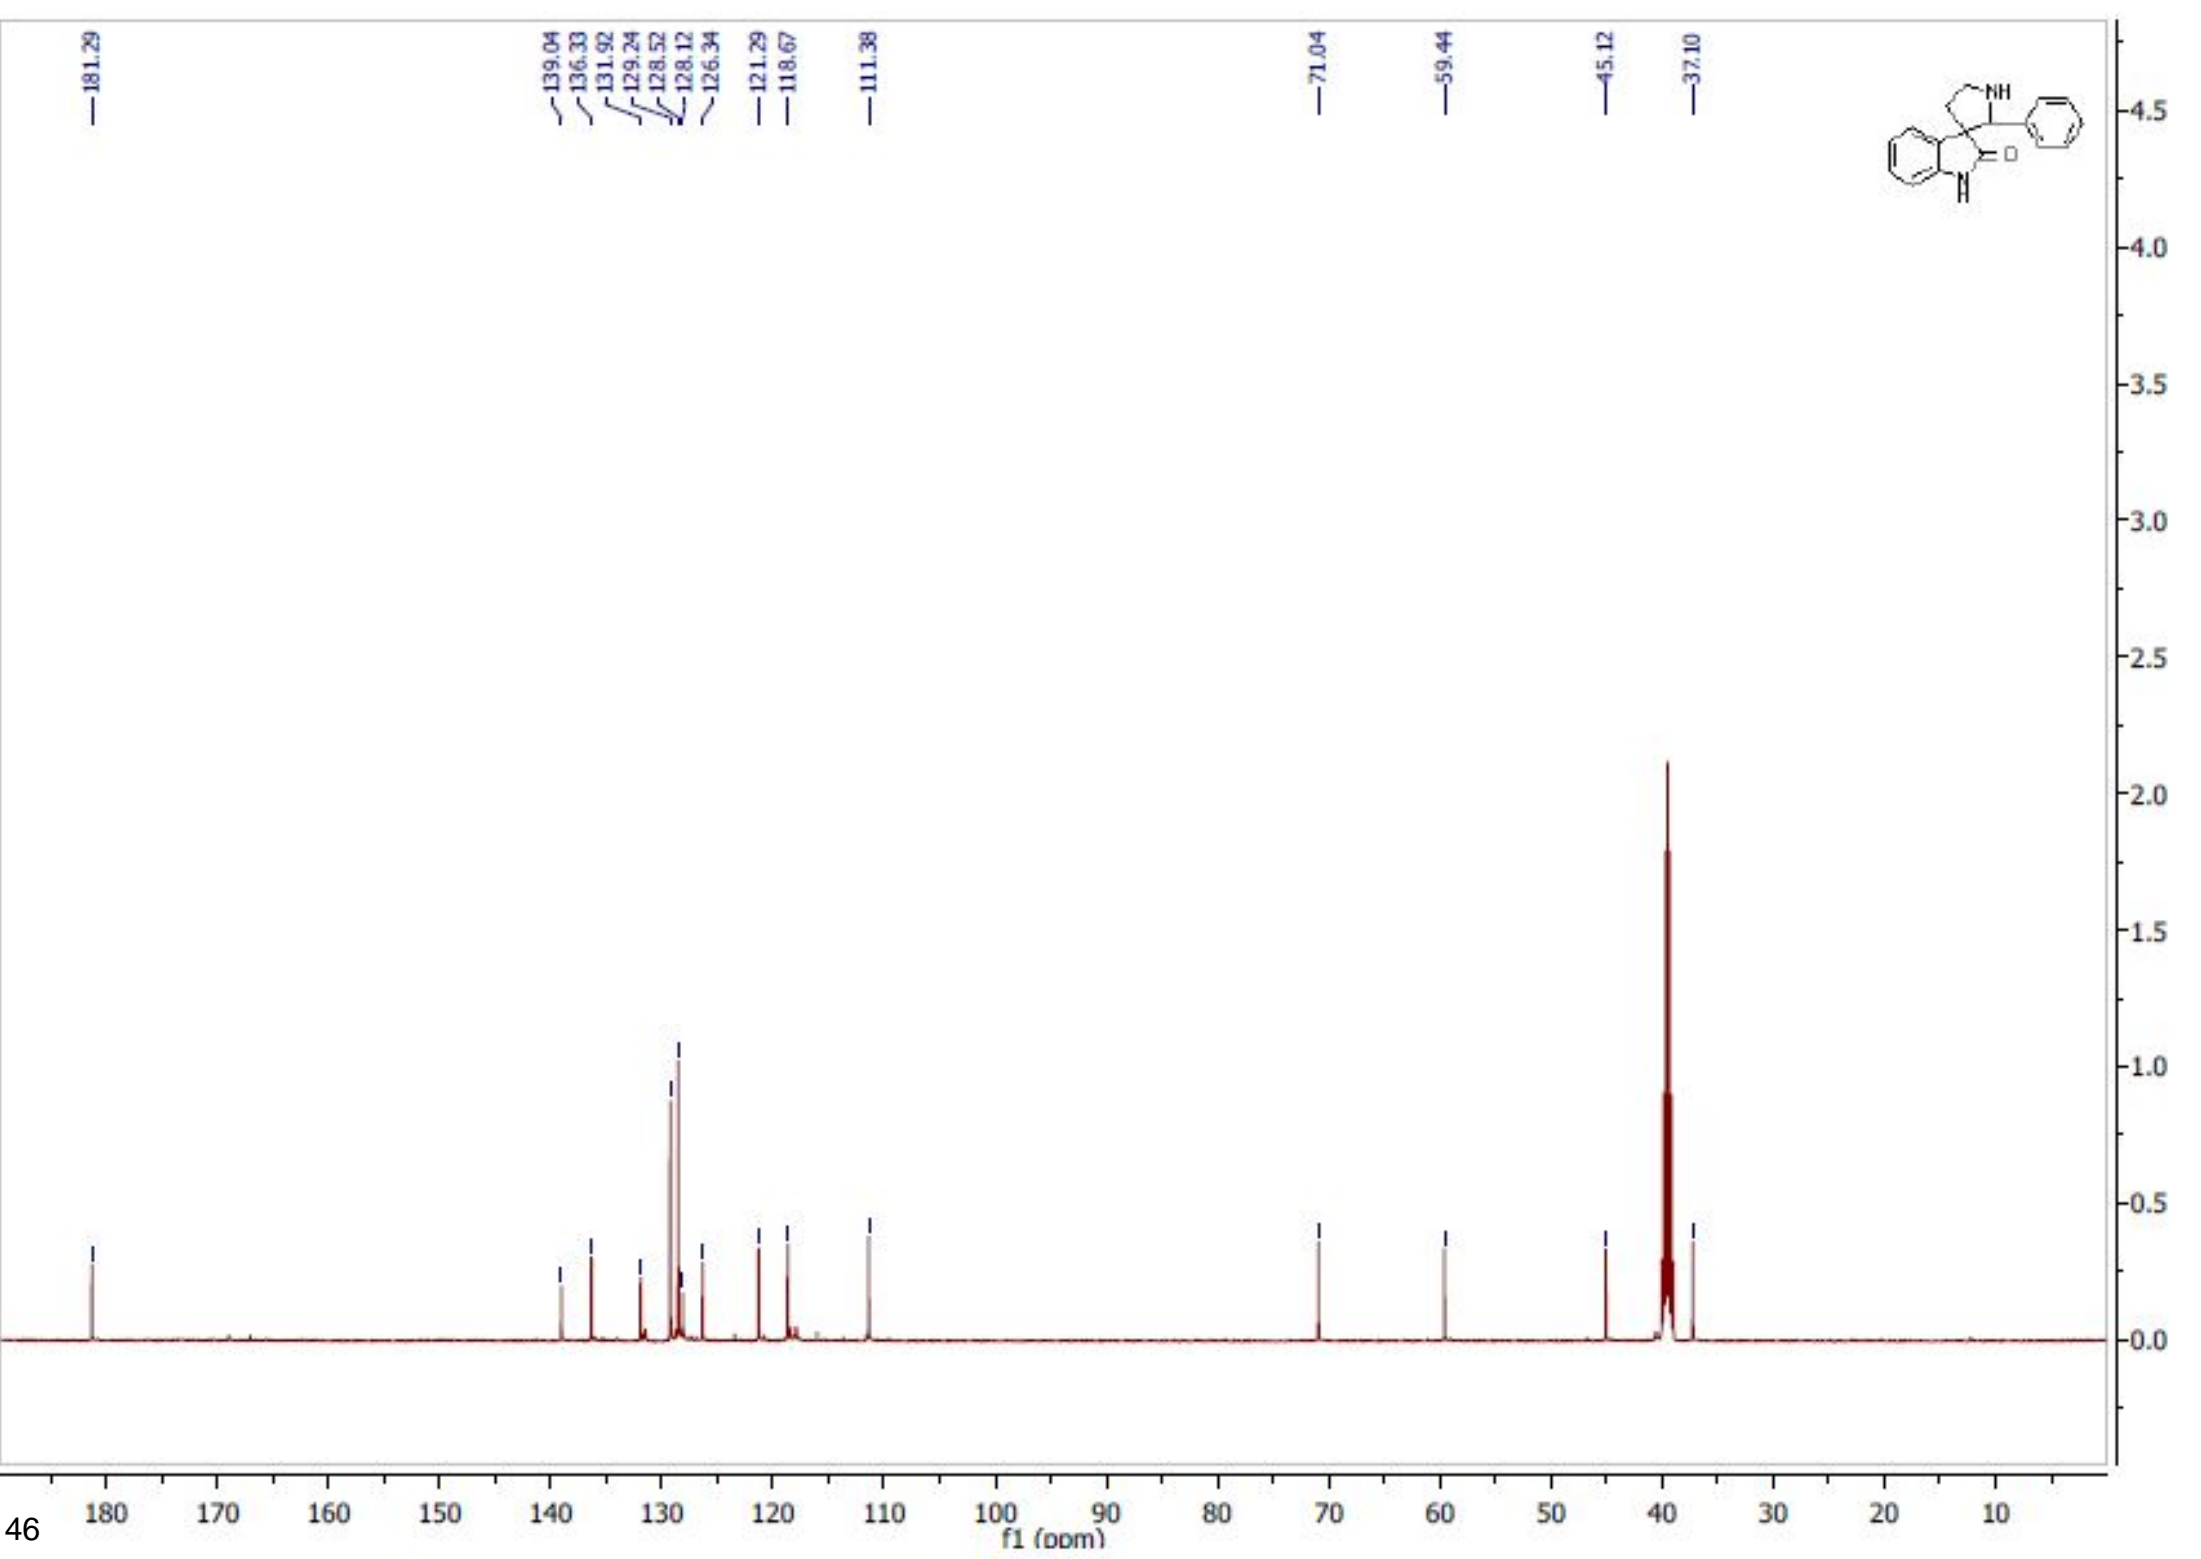

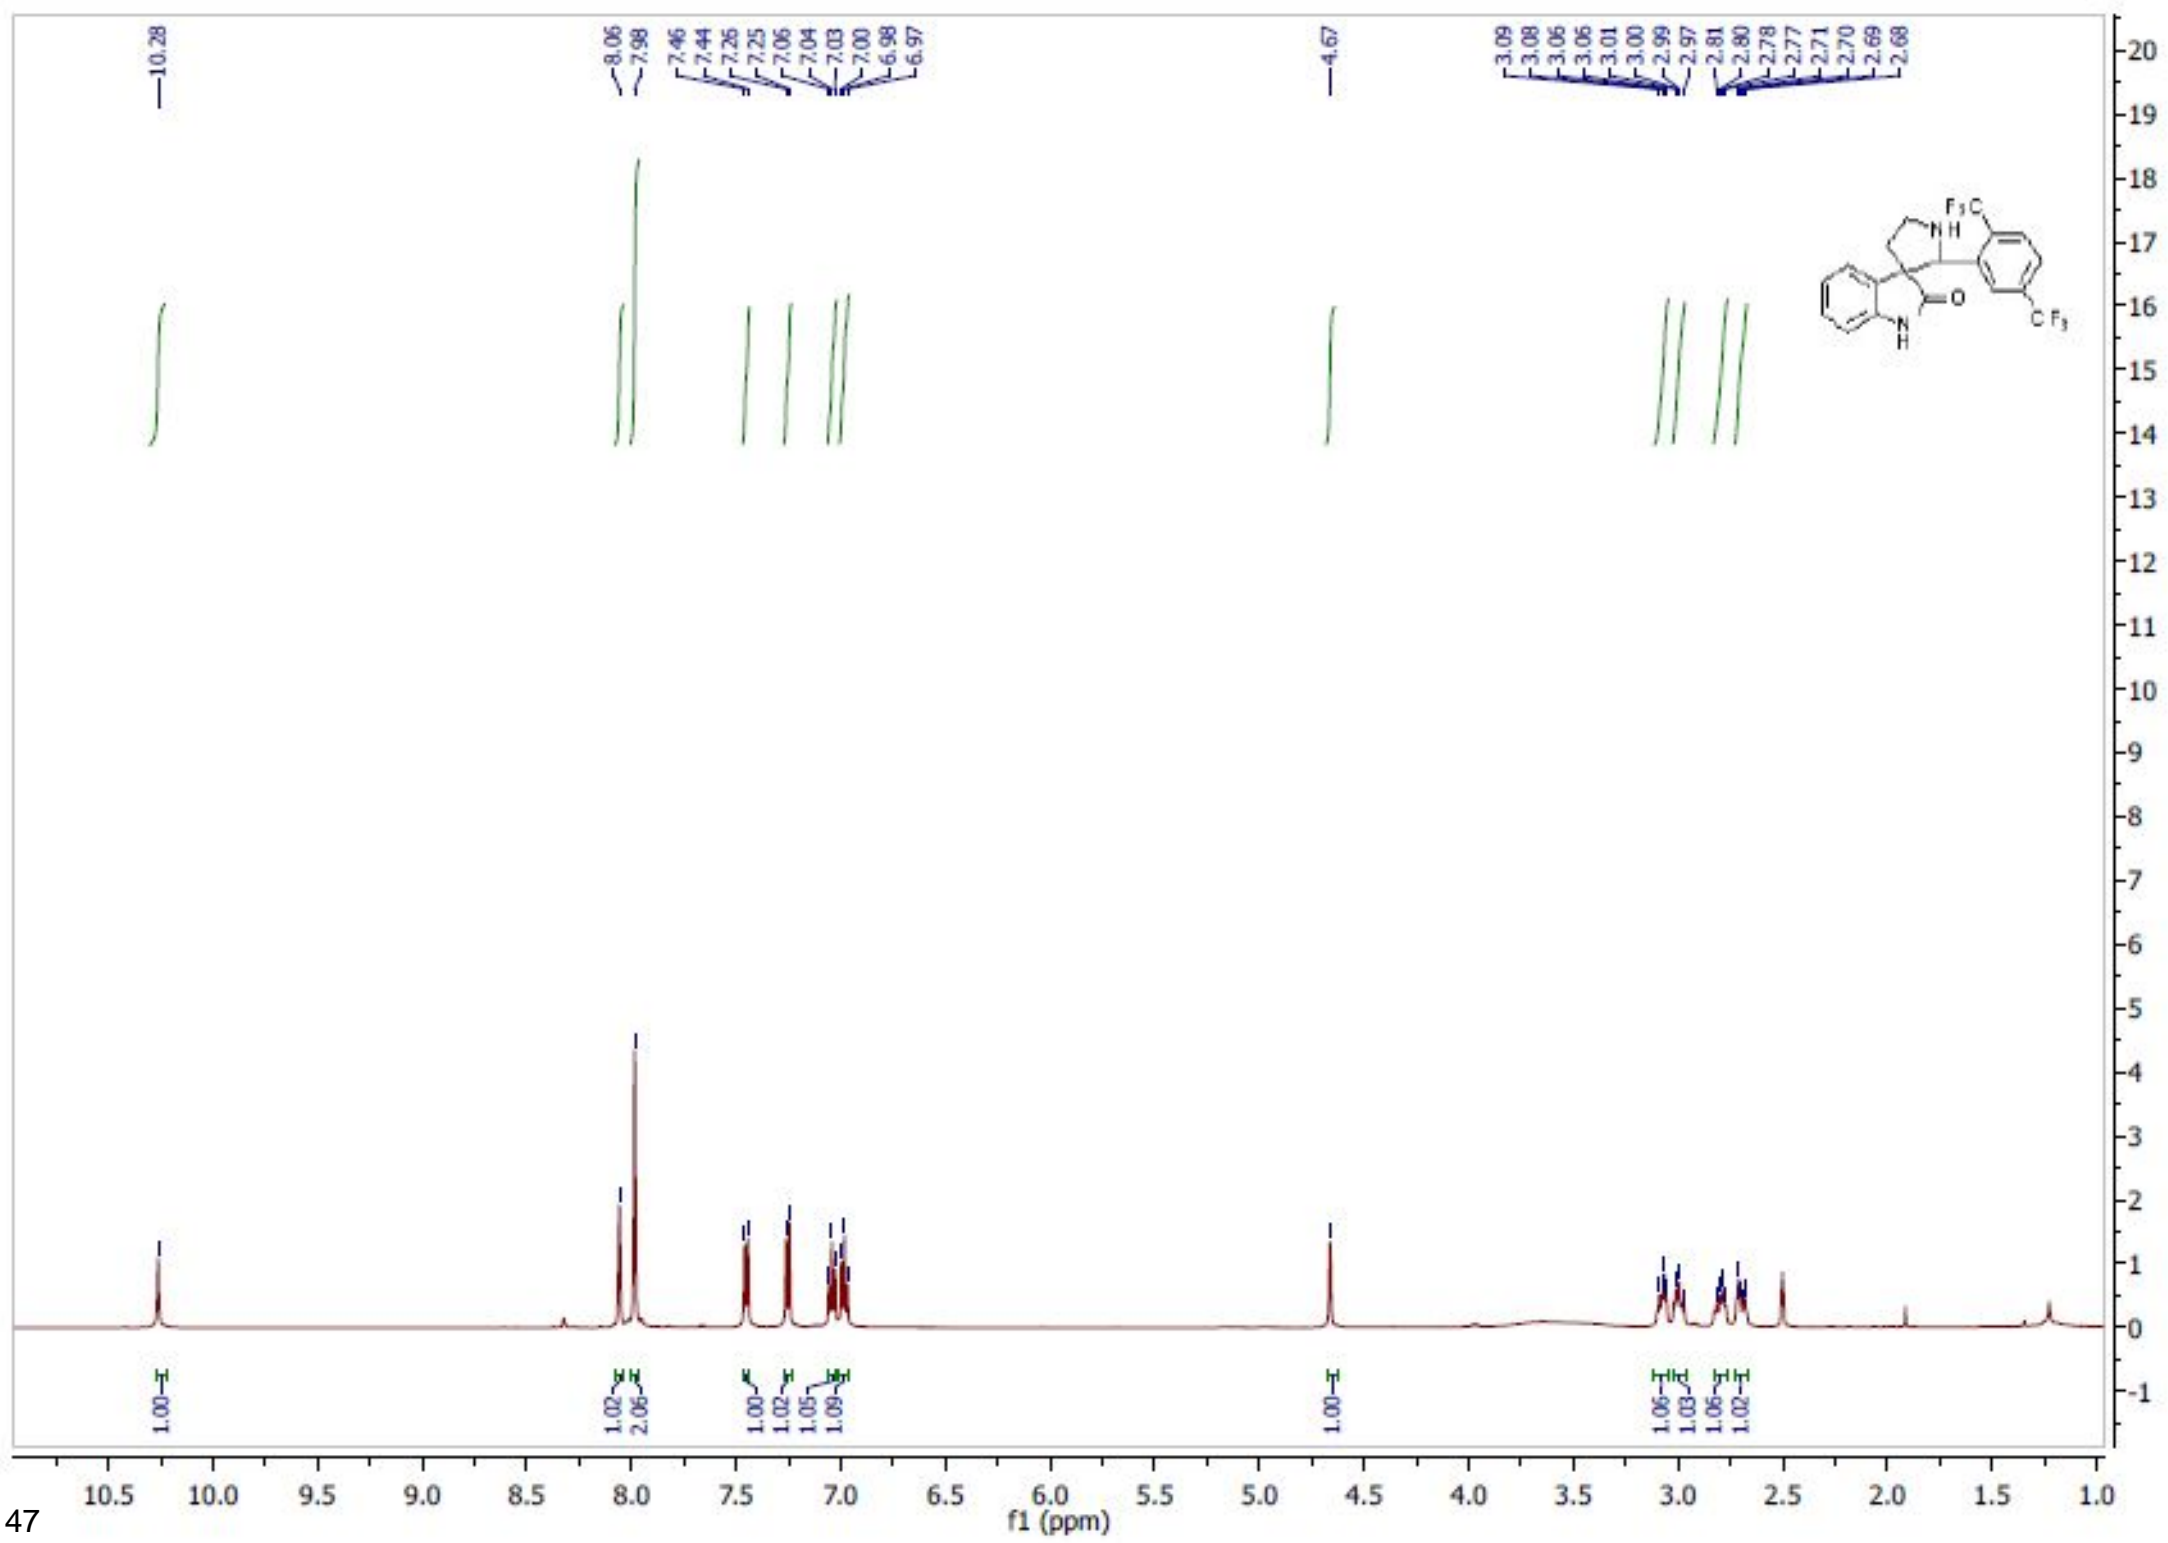

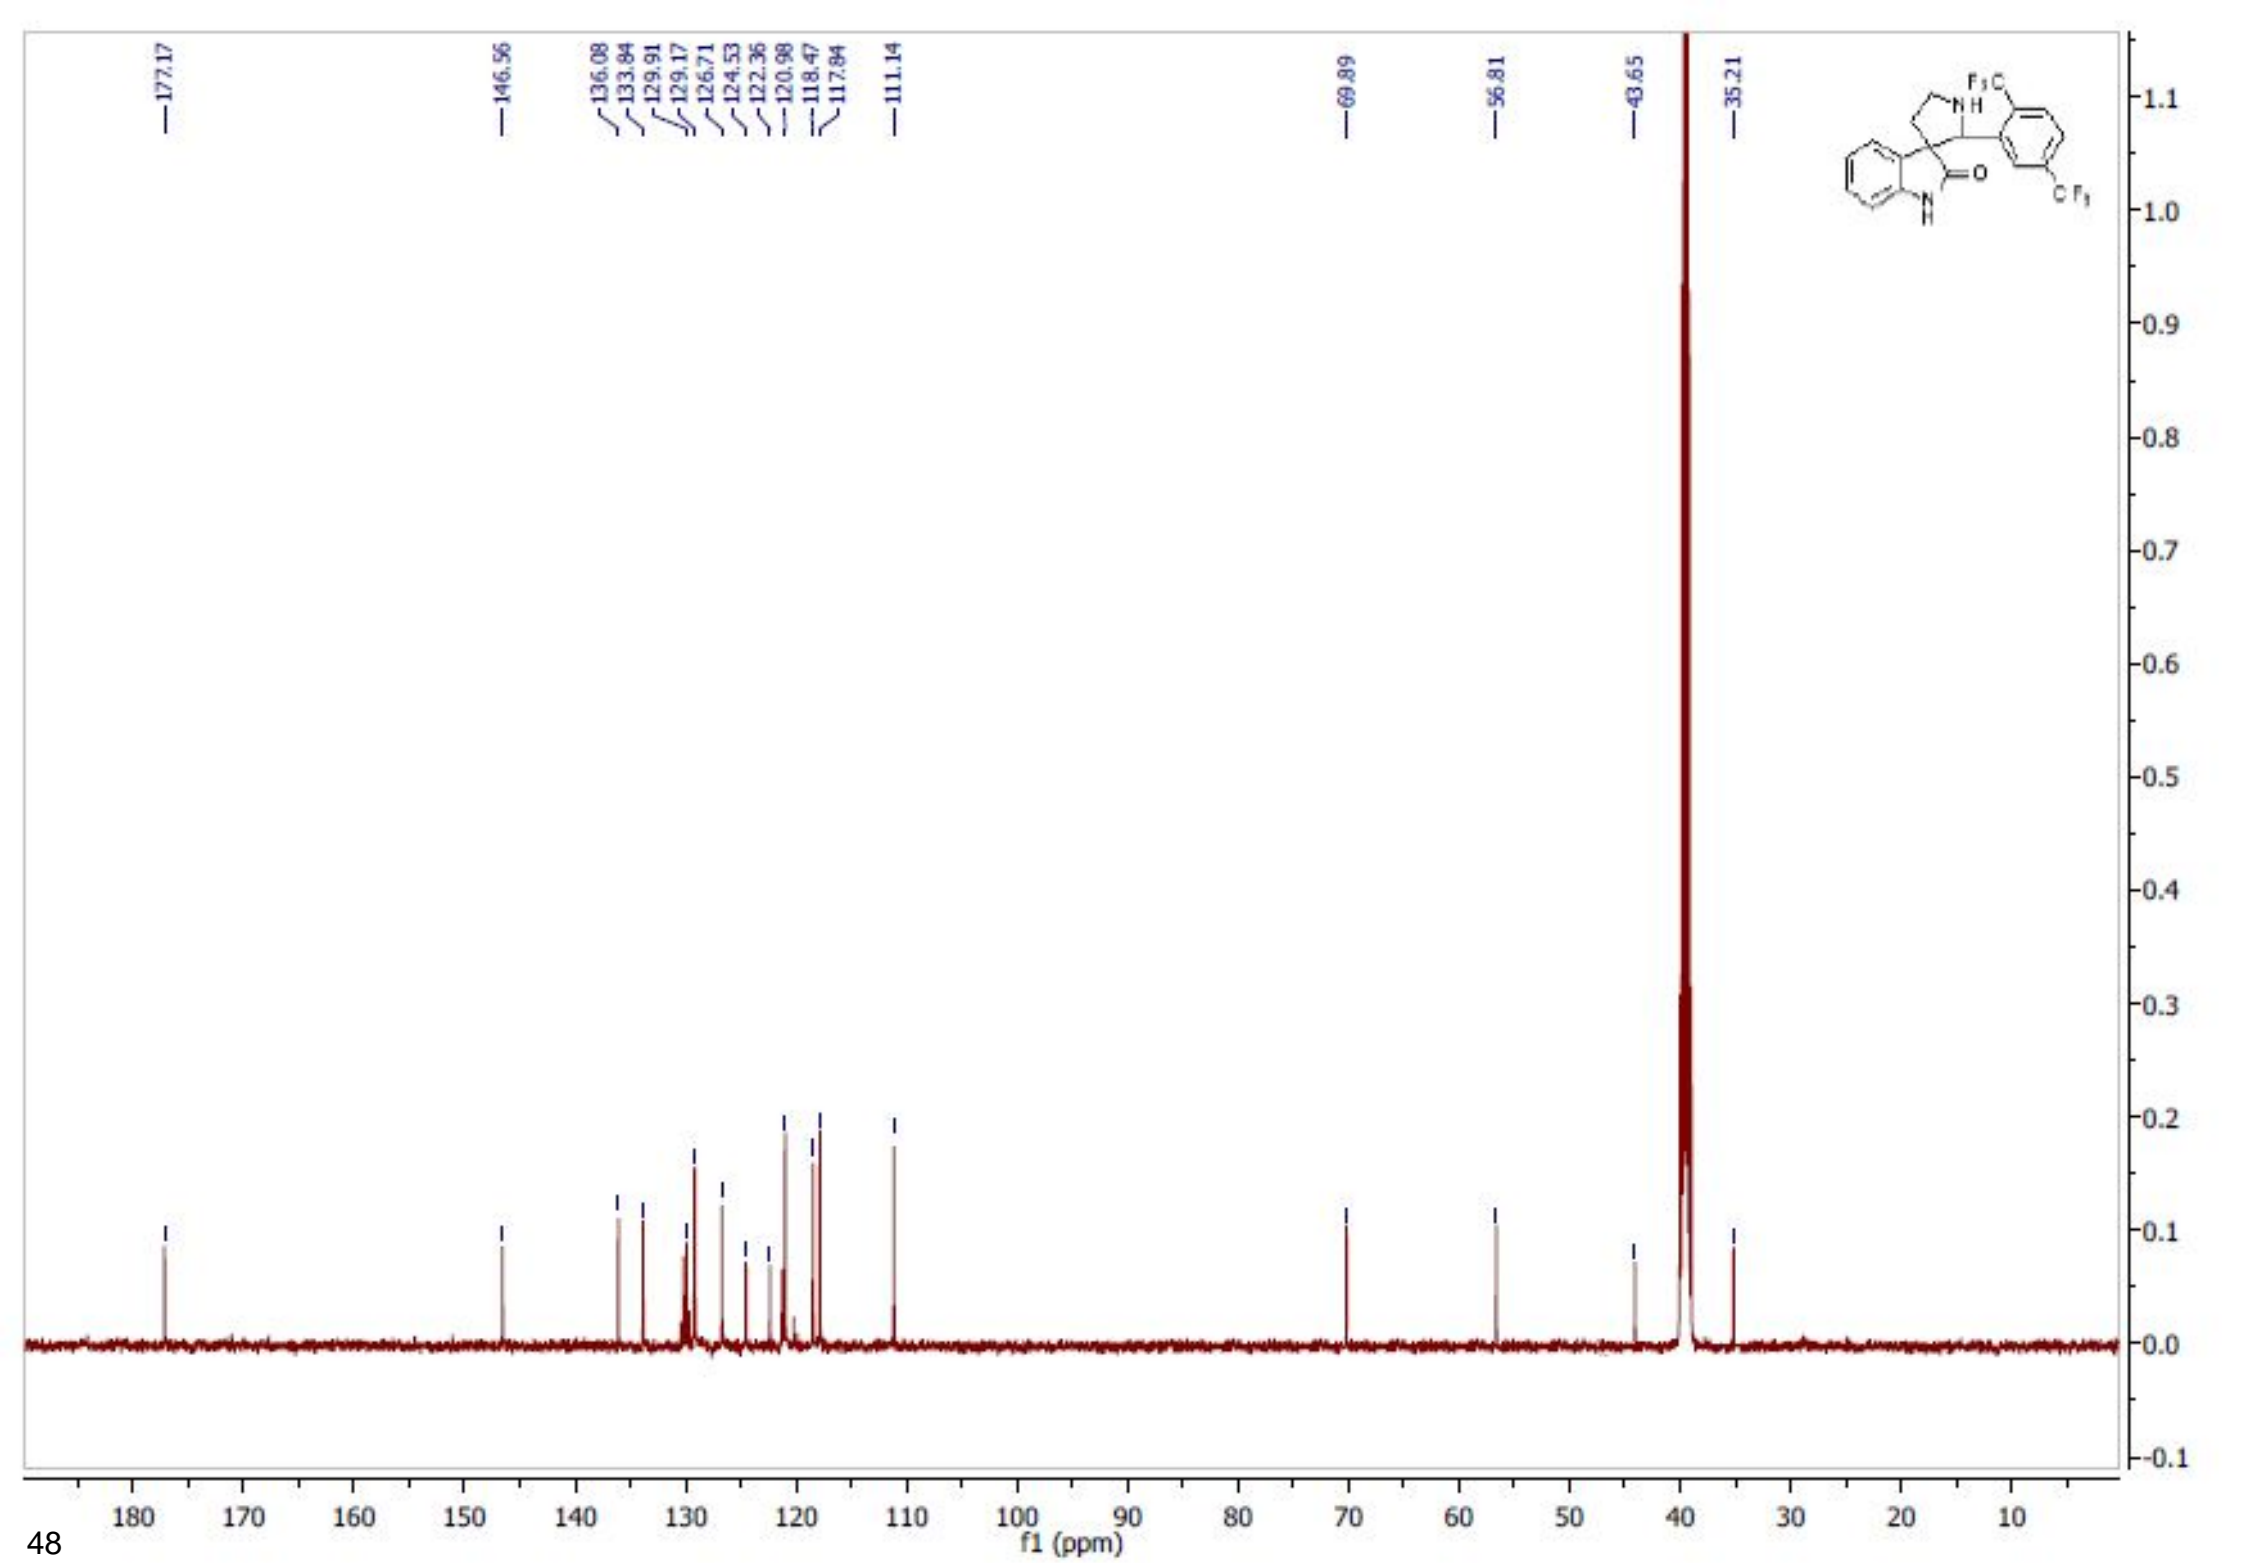



Compound 4a

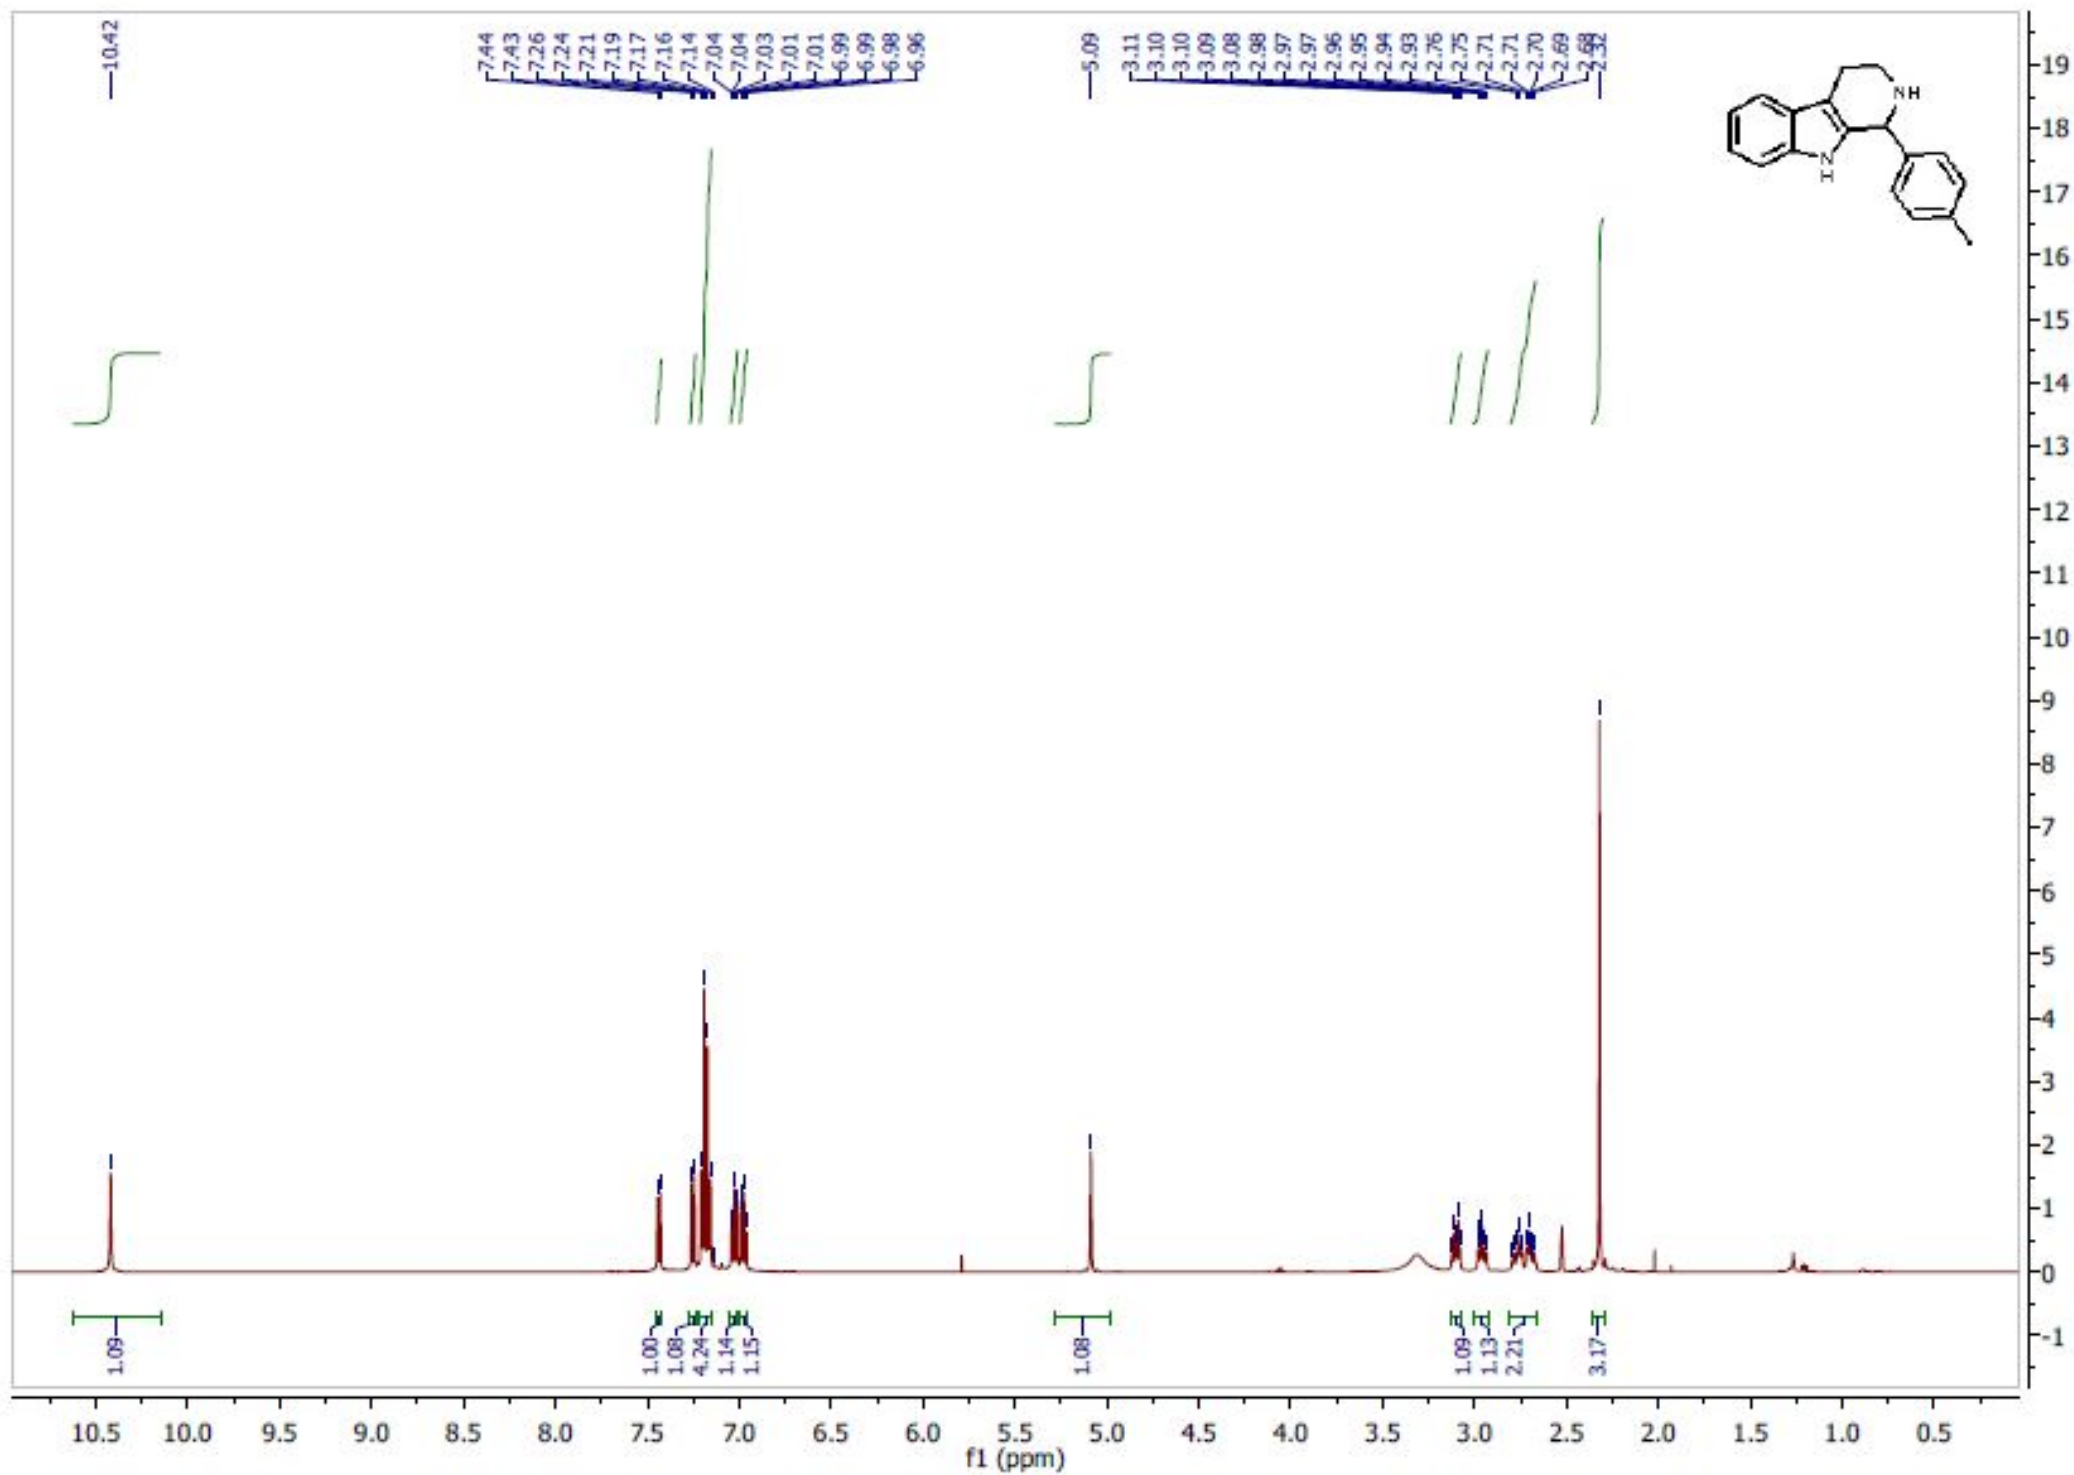

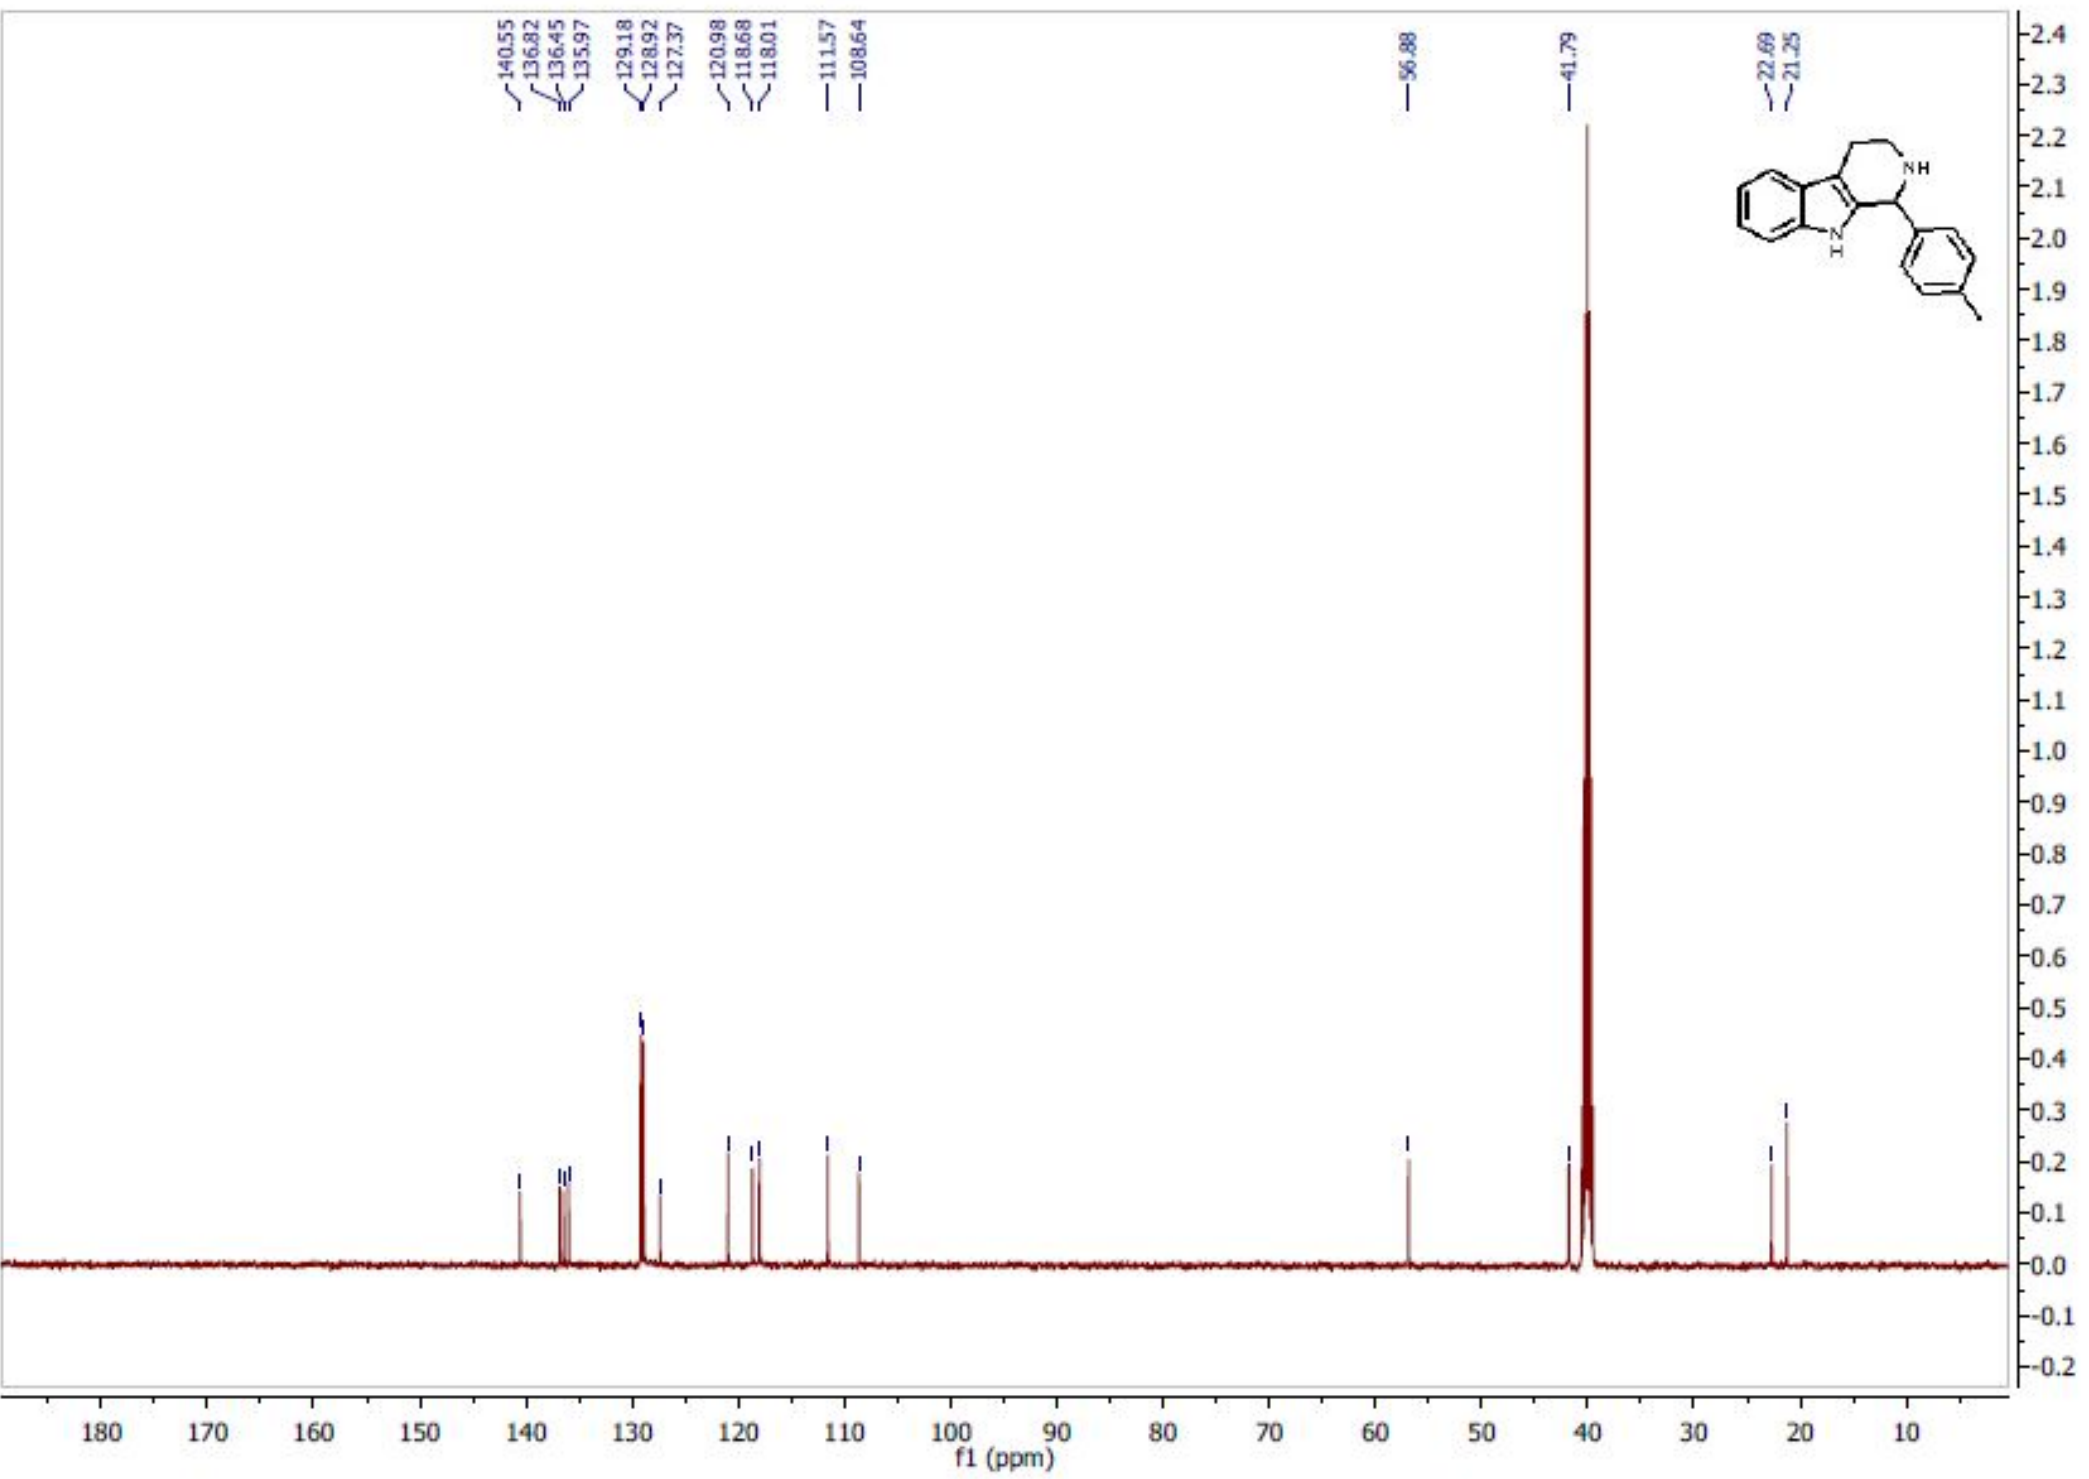

# HPLC Chromatogram

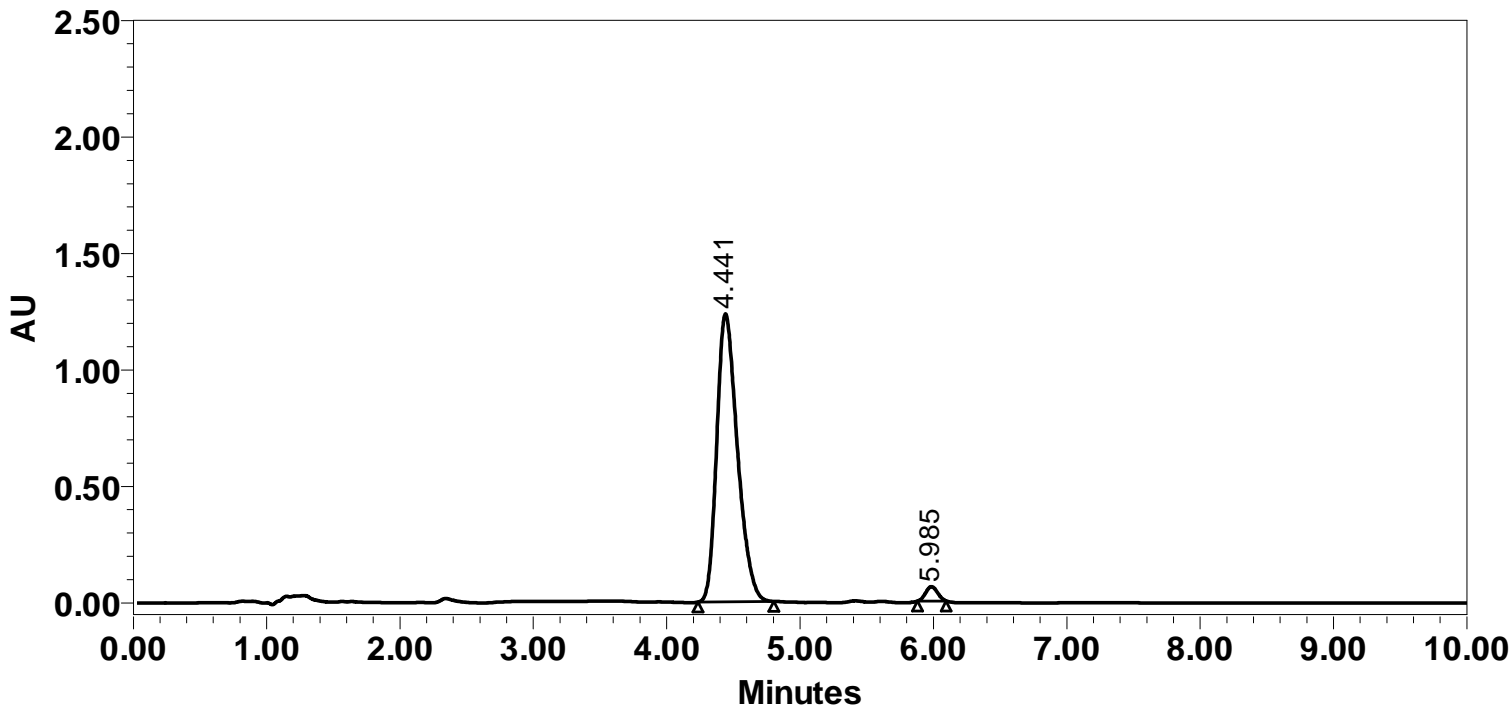

Sample Name: 6s

Vial: 68

Inj. #: 1

Date Acquired: 3/27/2016 5:49:52 PM IST

**Processed Channel: 2998 Ch1 254nm @ 1.2nm**

|   | Processed Channel    | Retention Time (min) | Area     | % Area | Height  |
|---|----------------------|----------------------|----------|--------|---------|
| 1 | 2998 Ch1 254nm@1.2nm | 4.441                | 13336179 | 97.21  | 1236224 |
| 2 | 2998 Ch1 254nm@1.2nm | 5.985                | 383189   | 2.79   | 62178   |

## HPLC Chromatogram

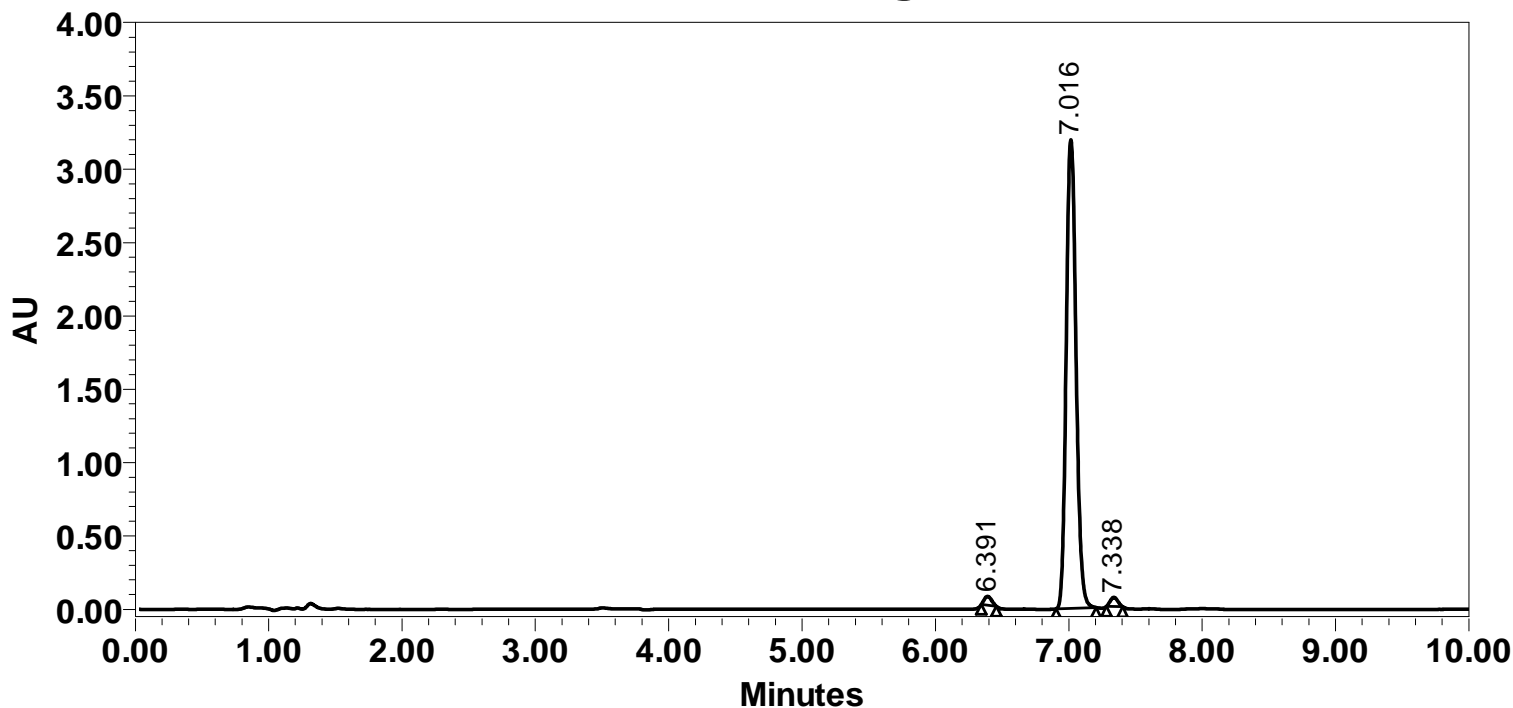

Sample Name: 4s

Vial: 66

Inj. #: 1

Date Acquired: 3/27/2016 5:26:12 PM IST

## Processed Channel: 2998 Ch1 254nm @ 1.2nm

|   | Processed Channel    | Retention Time (min) | Area     | % Area | Height  |
|---|----------------------|----------------------|----------|--------|---------|
| 1 | 2998 Ch1 254nm@1.2nm | 6.391                | 231208   | 1.37   | 60465   |
| 2 | 2998 Ch1 254nm@1.2nm | 7.016                | 16374665 | 97.17  | 3195681 |
| 3 | 2998 Ch1 254nm@1.2nm | 7.338                | 246202   | 1.46   | 62713   |

# HPLC Chromatogram

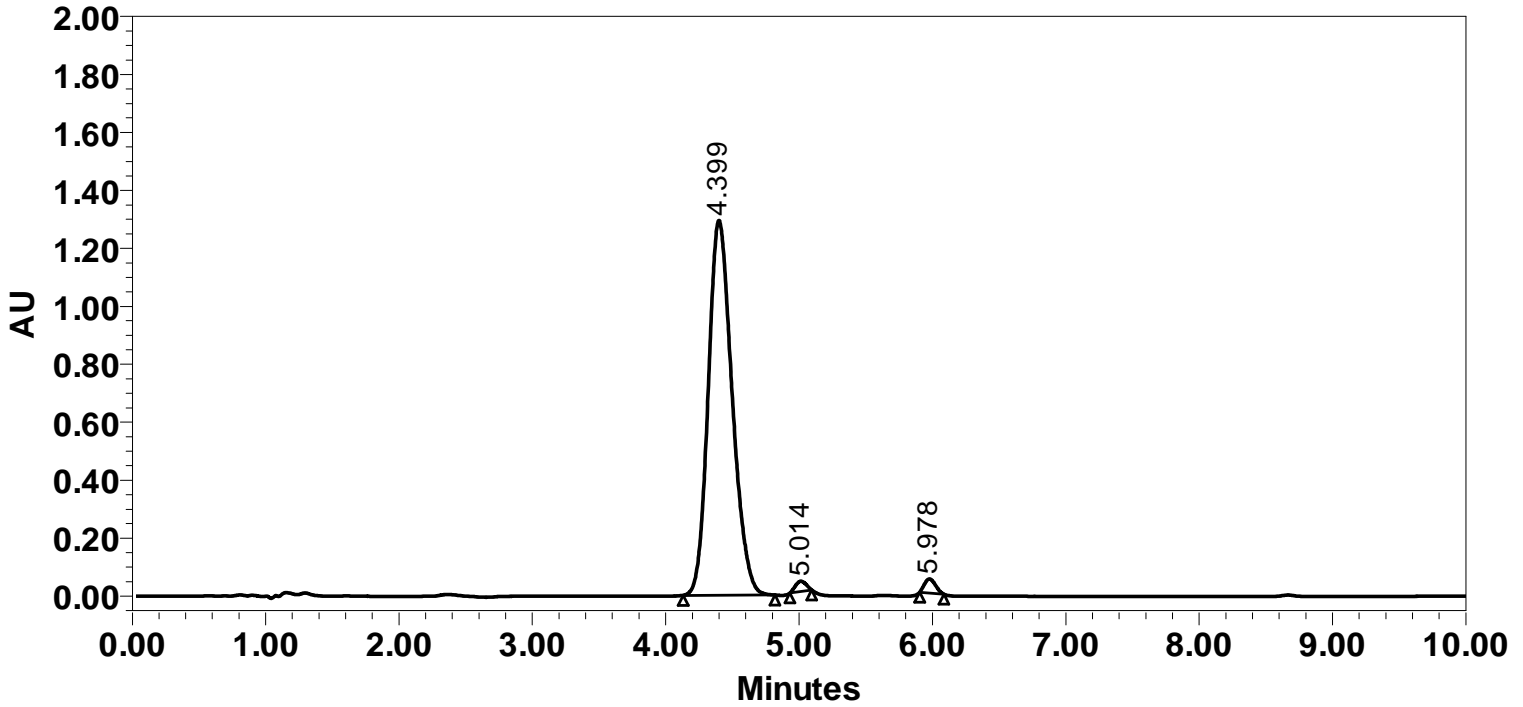

Sample Name: 5s

Vial: 67

Inj. #: 1

Date Acquired: 3/27/2016 5:38:00 PM IST

**Processed Channel: 2998 Ch1 254nm @ 1.2nm**

|   | Processed Channel    | Retention Time (min) | Area     | % Area | Height  |
|---|----------------------|----------------------|----------|--------|---------|
| 1 | 2998 Ch1 254nm@1.2nm | 4.399                | 16089285 | 97.13  | 1293590 |
| 2 | 2998 Ch1 254nm@1.2nm | 5.014                | 198077   | 1.20   | 35262   |
| 3 | 2998 Ch1 254nm@1.2nm | 5.978                | 277549   | 1.68   | 48635   |

## HPLC Chromatogram

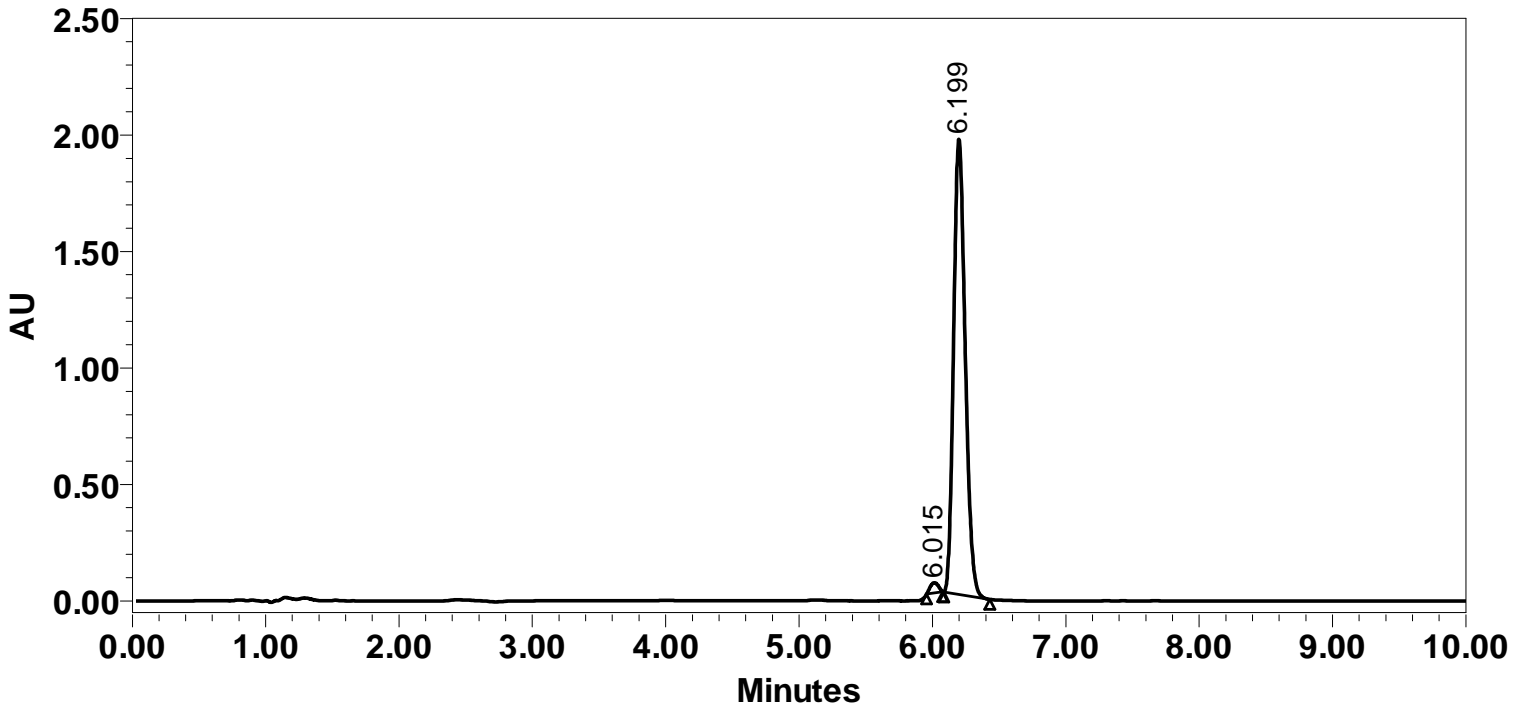

Sample Name: 8s

Vial: 69

Inj. #: 1

Date Acquired: 3/27/2016 6:01:43 PM IST

### Processed Channel: 2998 Ch1 254nm @ 1.2nm

|   | Processed Channel    | Retention Time (min) | Area     | % Area | Height  |
|---|----------------------|----------------------|----------|--------|---------|
| 1 | 2998 Ch1 254nm@1.2nm | 6.015                | 188891   | 1.58   | 44490   |
| 2 | 2998 Ch1 254nm@1.2nm | 6.199                | 11802782 | 98.42  | 1953735 |

## HPLC Chromatogram

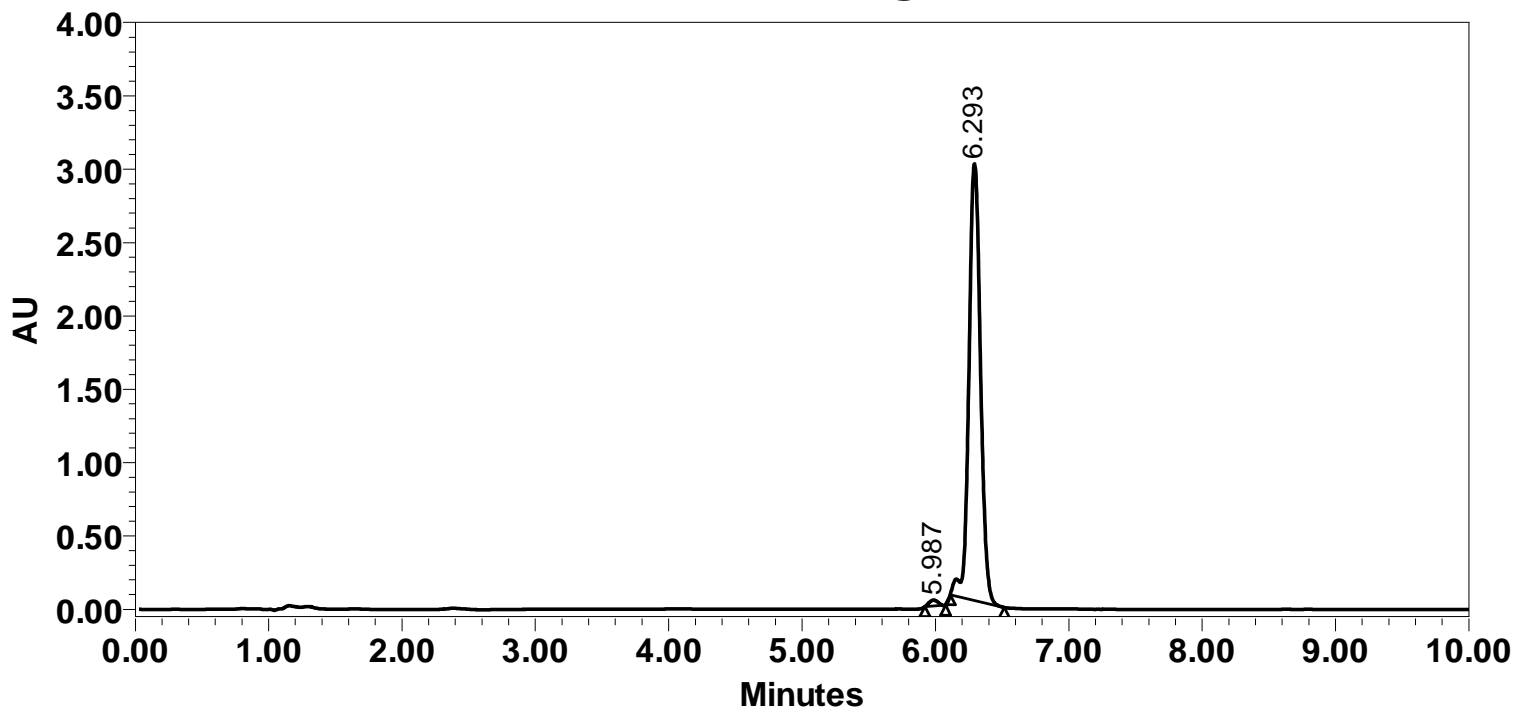

Sample Name: 9s

Vial: 70

Inj. #: 1

Date Acquired: 3/27/2016 6:13:30 PM IST

Processed Channel: 2998 Ch1 254nm @ 1.2nm

|   | Processed Channel    | Retention Time (min) | Area     | % Area | Height  |
|---|----------------------|----------------------|----------|--------|---------|
| 1 | 2998 Ch1 254nm@1.2nm | 5.987                | 188546   | 1.03   | 40505   |
| 2 | 2998 Ch1 254nm@1.2nm | 6.293                | 18035527 | 98.97  | 2977405 |

## HPLC Chromatogram

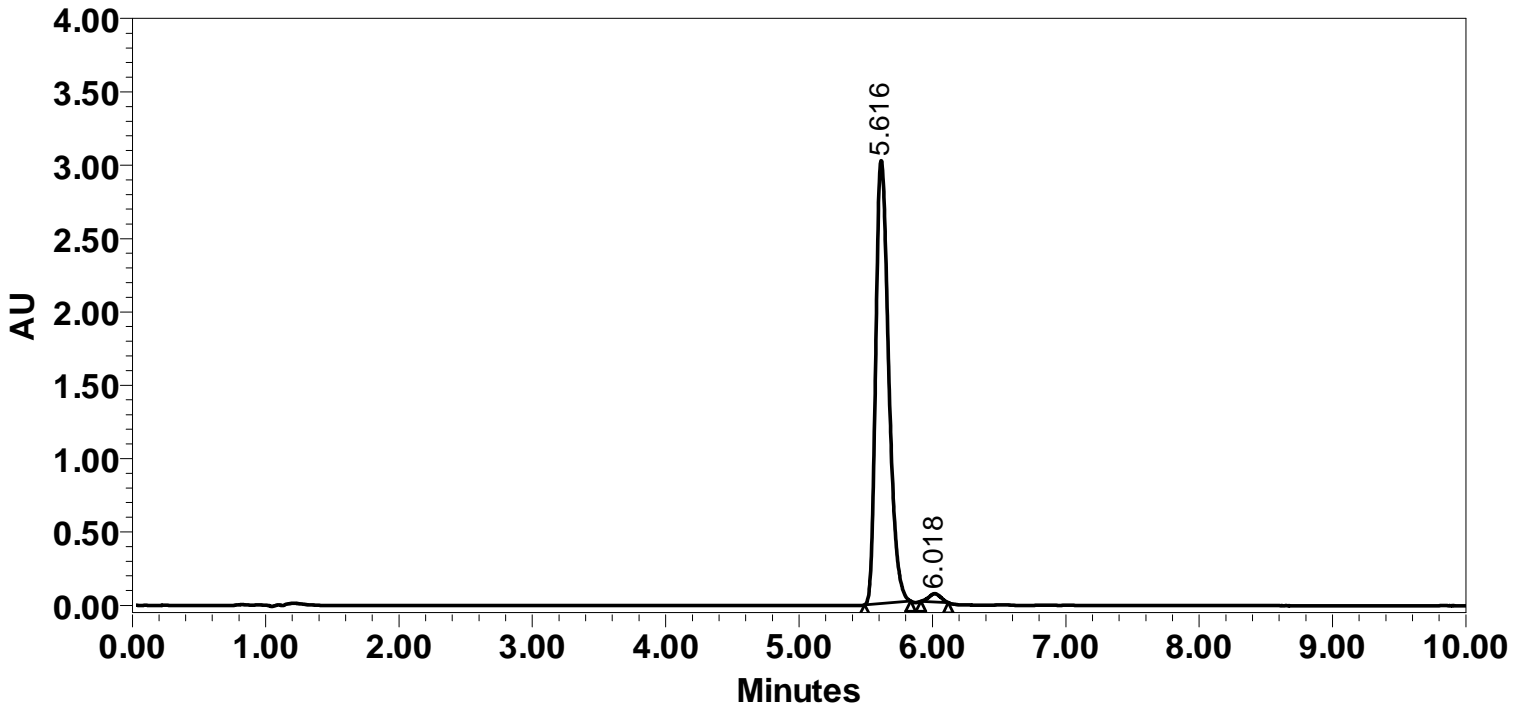

Sample Name: 11fas

Vial: 11

Inj. #: 1

Date Acquired: 3/28/2016 2:43:53 PM IST

### Processed Channel: 2998 Ch1 254nm @ 1.2nm

|   | Processed Channel    | Retention Time (min) | Area     | % Area | Height  |
|---|----------------------|----------------------|----------|--------|---------|
| 1 | 2998 Ch1 254nm@1.2nm | 5.616                | 20490647 | 98.30  | 3019899 |
| 2 | 2998 Ch1 254nm@1.2nm | 6.018                | 353810   | 1.70   | 56883   |



# HPLC Chromatogram

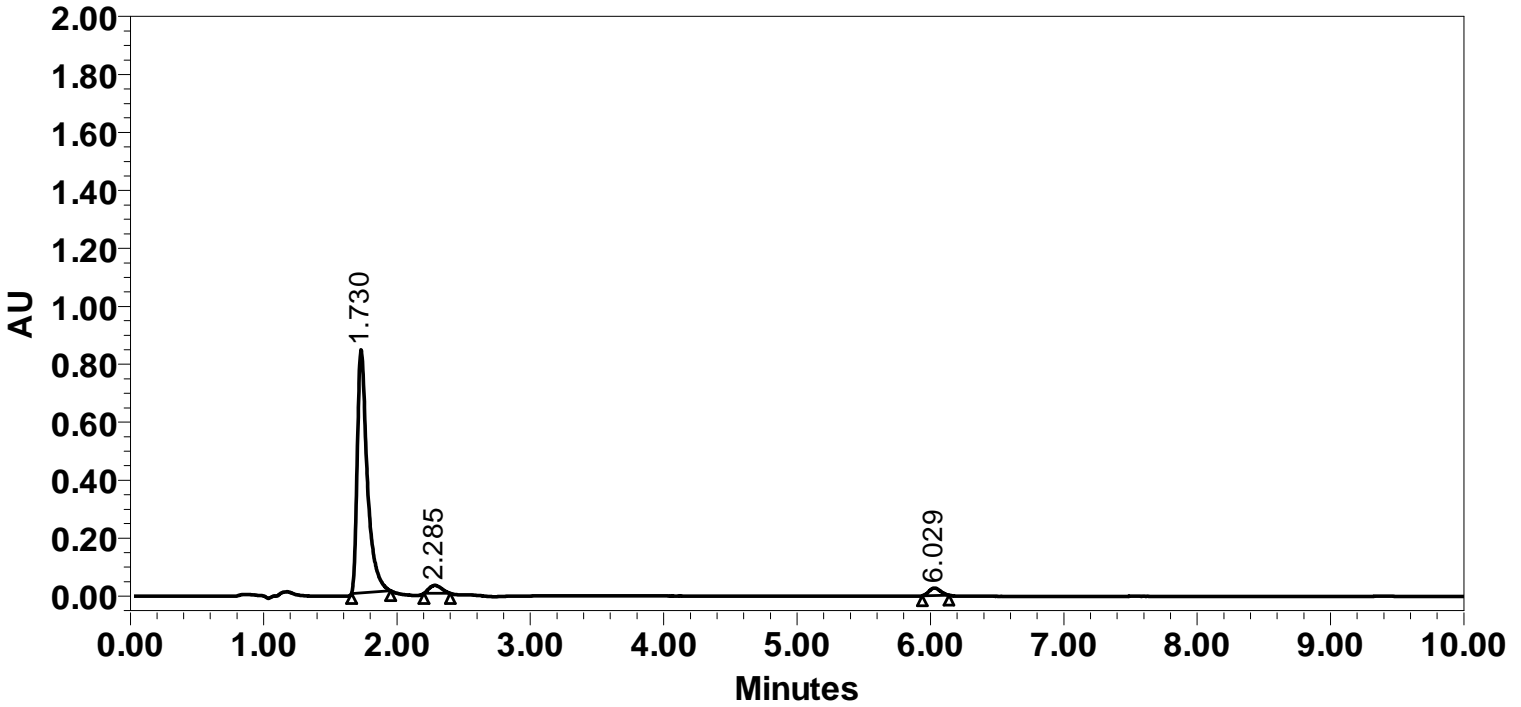

**Sample Name:** 11s  
**Vial:** 12  
**Inj. #:** 1  
**Date Acquired:** 3/28/2016 2:55:45 PM IST

**Processed Channel: 2998 Ch1**  
**254nm @ 1.2nm**

|   | Processed Channel    | Retention Time (min) | Area    | % Area | Height |
|---|----------------------|----------------------|---------|--------|--------|
| 1 | 2998 Ch1 254nm@1.2nm | 1.730                | 4395221 | 92.99  | 838467 |
| 2 | 2998 Ch1 254nm@1.2nm | 2.285                | 180280  | 3.81   | 27567  |
| 3 | 2998 Ch1 254nm@1.2nm | 6.029                | 151156  | 3.20   | 26018  |

## HPLC Chromatogram

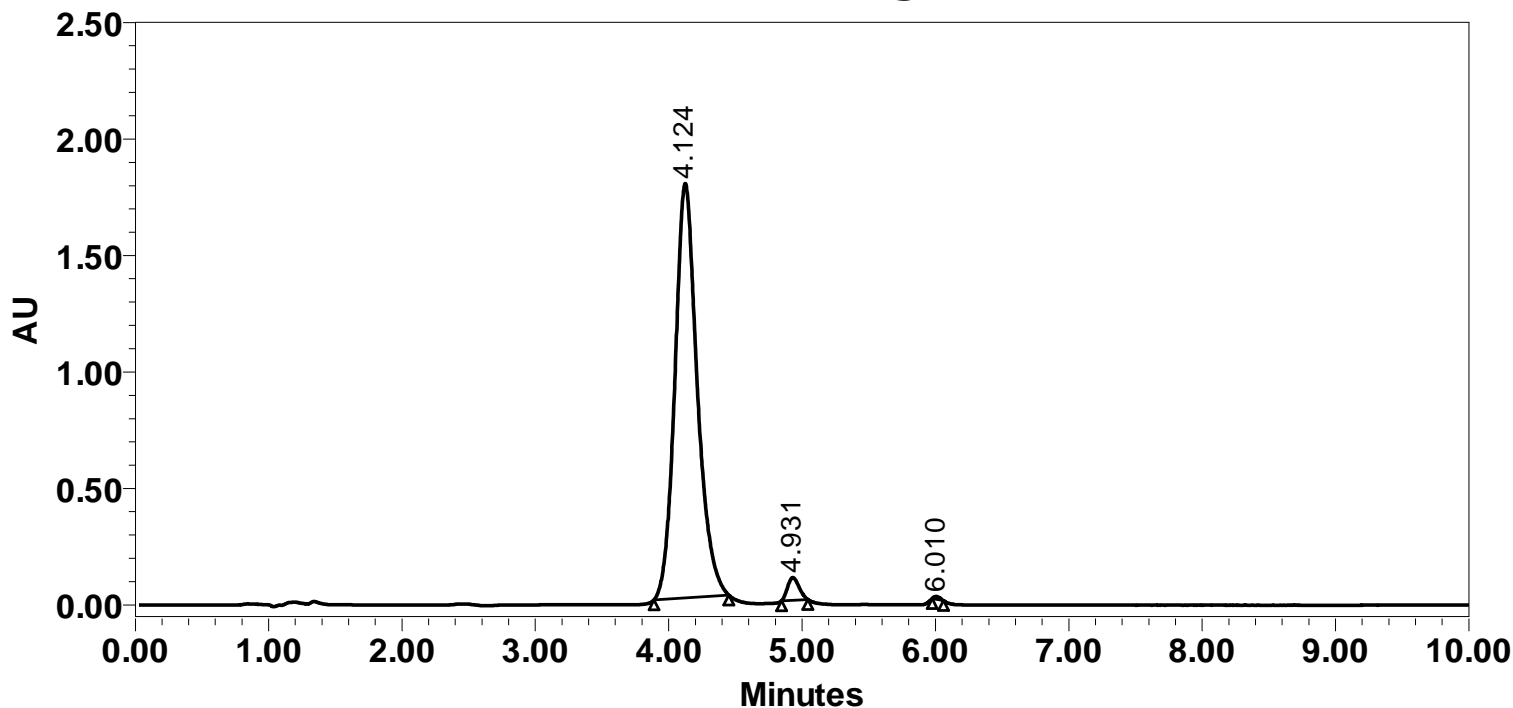

Sample Name: 12s

Vial: 13

Inj. #: 1

Date Acquired: 3/28/2016 3:07:38 PM IST

### Processed Channel: 2998 Ch1 254nm@1.2nm

|   | Processed Channel    | Retention Time (min) | Area     | % Area | Height  |
|---|----------------------|----------------------|----------|--------|---------|
| 1 | 2998 Ch1 254nm@1.2nm | 4.124                | 20675103 | 97.11  | 1778445 |
| 2 | 2998 Ch1 254nm@1.2nm | 4.931                | 575948   | 2.71   | 97453   |
| 3 | 2998 Ch1 254nm@1.2nm | 6.010                | 39461    | 0.19   | 12536   |

## HPLC Chromatogram

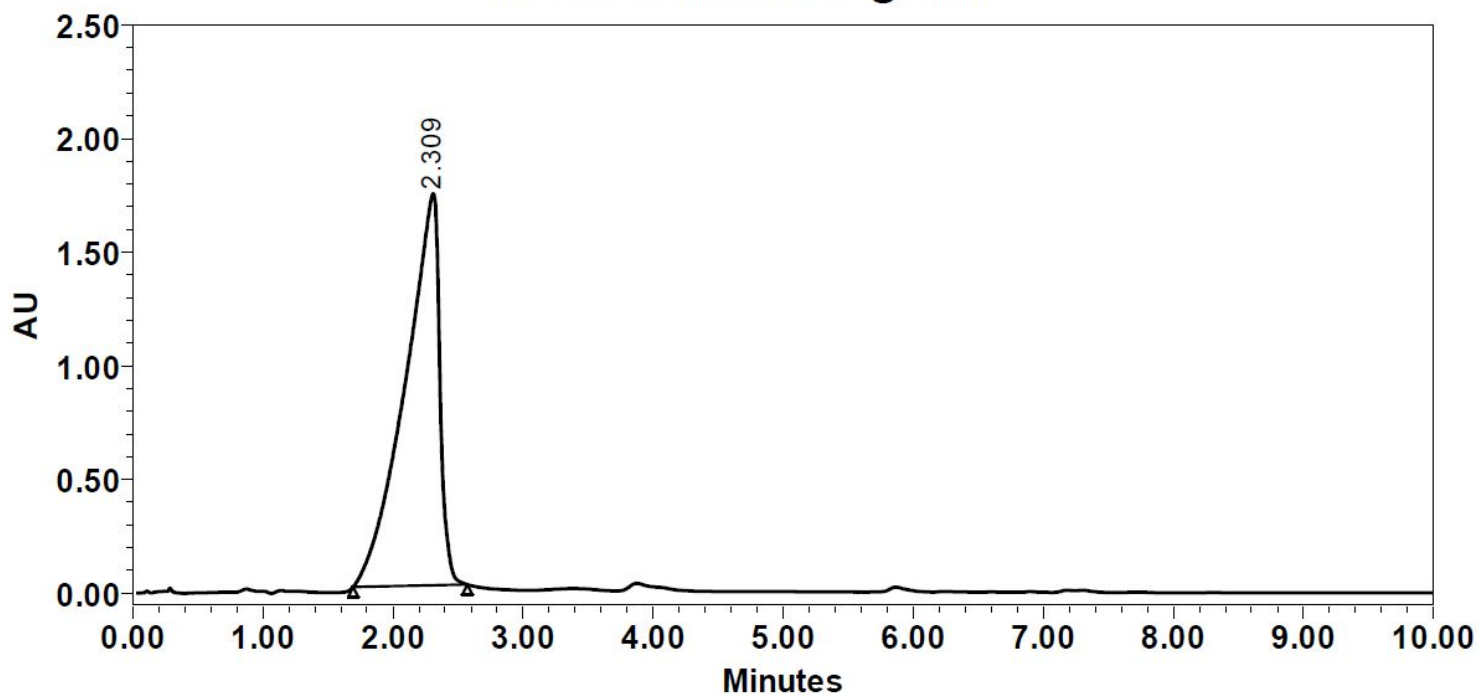

Sample Name: 13s

Vial: 10

Inj. #: 1

Date Acquired: 3/28/2016 2:32:02 PM IST

**Processed Channel: 2998 Ch1 254nm@1.2nm**

|   | Processed Channel    | Retention Time (min) | Area     | % Area | Height  |
|---|----------------------|----------------------|----------|--------|---------|
| 1 | 2998 Ch1 254nm@1.2nm | 2.309                | 31794415 | 100.00 | 1723526 |

## HPLC Chromatogram

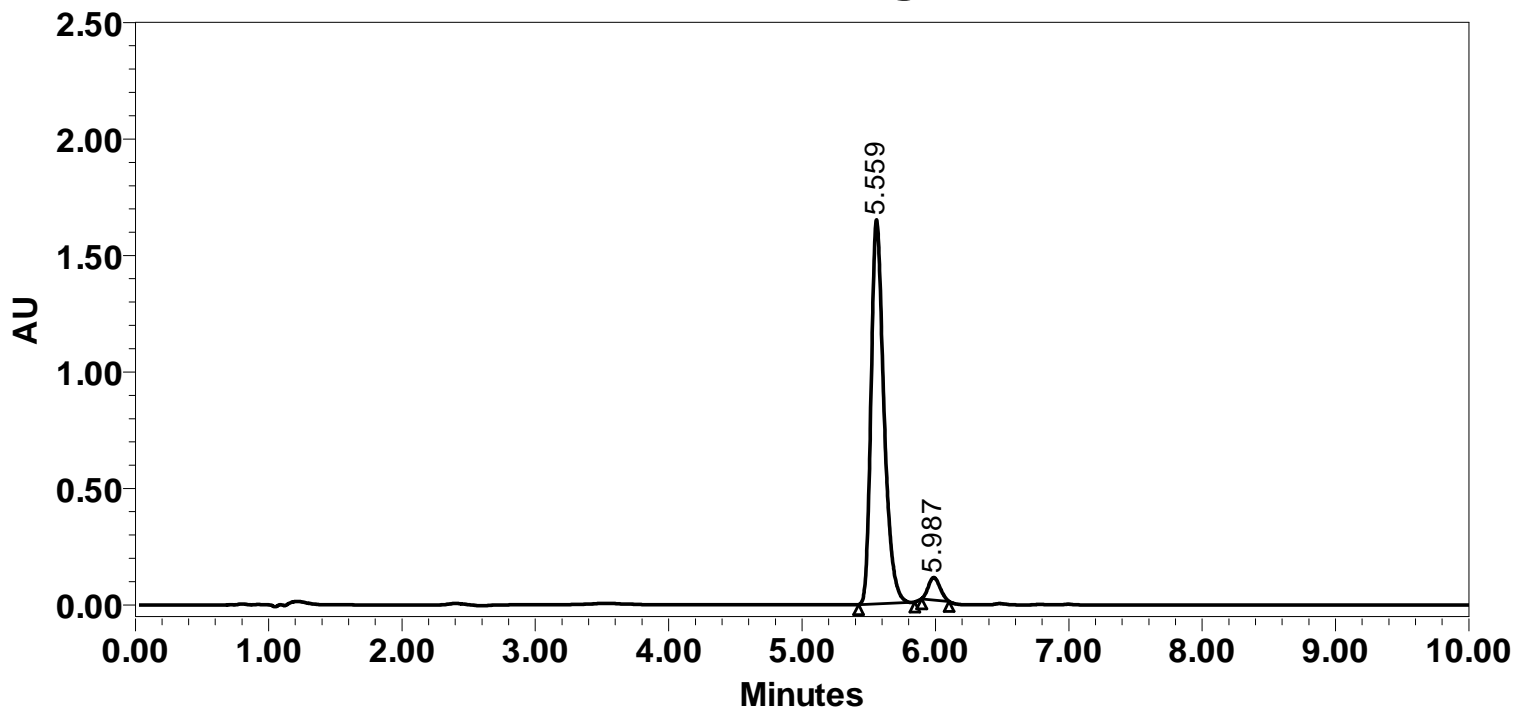

Sample Name: 14s

Vial: 15

Inj. #: 1

Date Acquired: 3/28/2016 3:31:15 PM IST

Processed Channel: 2998 Ch1 254nm @ 1.2nm

|   | Processed Channel    | Retention Time (min) | Area     | % Area | Height  |
|---|----------------------|----------------------|----------|--------|---------|
| 1 | 2998 Ch1 254nm@1.2nm | 5.559                | 11064984 | 94.98  | 1647854 |
| 2 | 2998 Ch1 254nm@1.2nm | 5.987                | 584412   | 5.02   | 96570   |

## HPLC Chromatogram

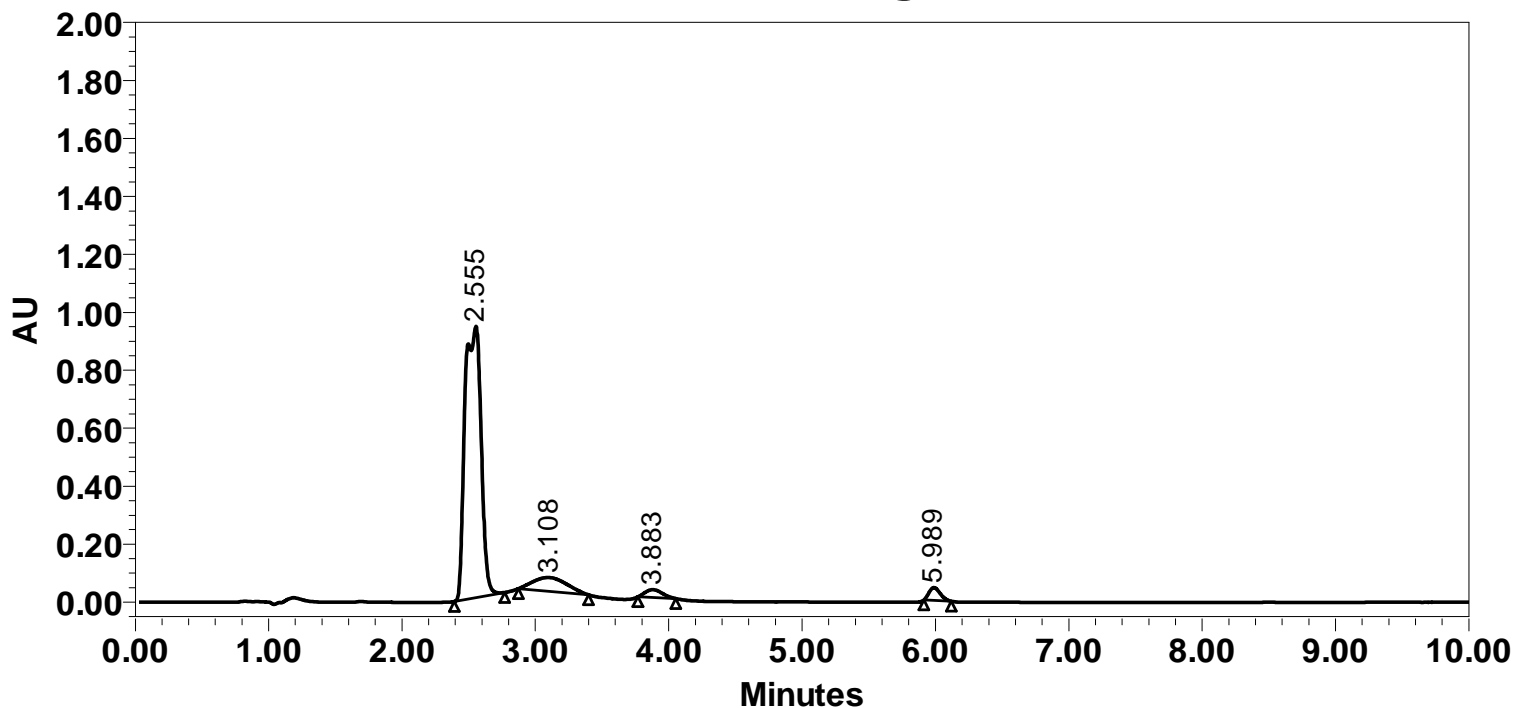

Sample Name: 16s

Vial: 16

Inj. #: 1

Date Acquired: 3/28/2016 3:43:08 PM IST

**Processed Channel: 2998 Ch1**  
**254nm @ 1.2nm**

|   | Processed Channel    | Retention Time (min) | Area    | % Area | Height |
|---|----------------------|----------------------|---------|--------|--------|
| 1 | 2998 Ch1 254nm@1.2nm | 2.555                | 7904195 | 85.38  | 935925 |
| 2 | 2998 Ch1 254nm@1.2nm | 3.108                | 847858  | 9.16   | 48034  |
| 3 | 2998 Ch1 254nm@1.2nm | 3.883                | 245112  | 2.65   | 27597  |
| 4 | 2998 Ch1 254nm@1.2nm | 5.989                | 259993  | 2.81   | 44729  |

## HPLC Chromatogram

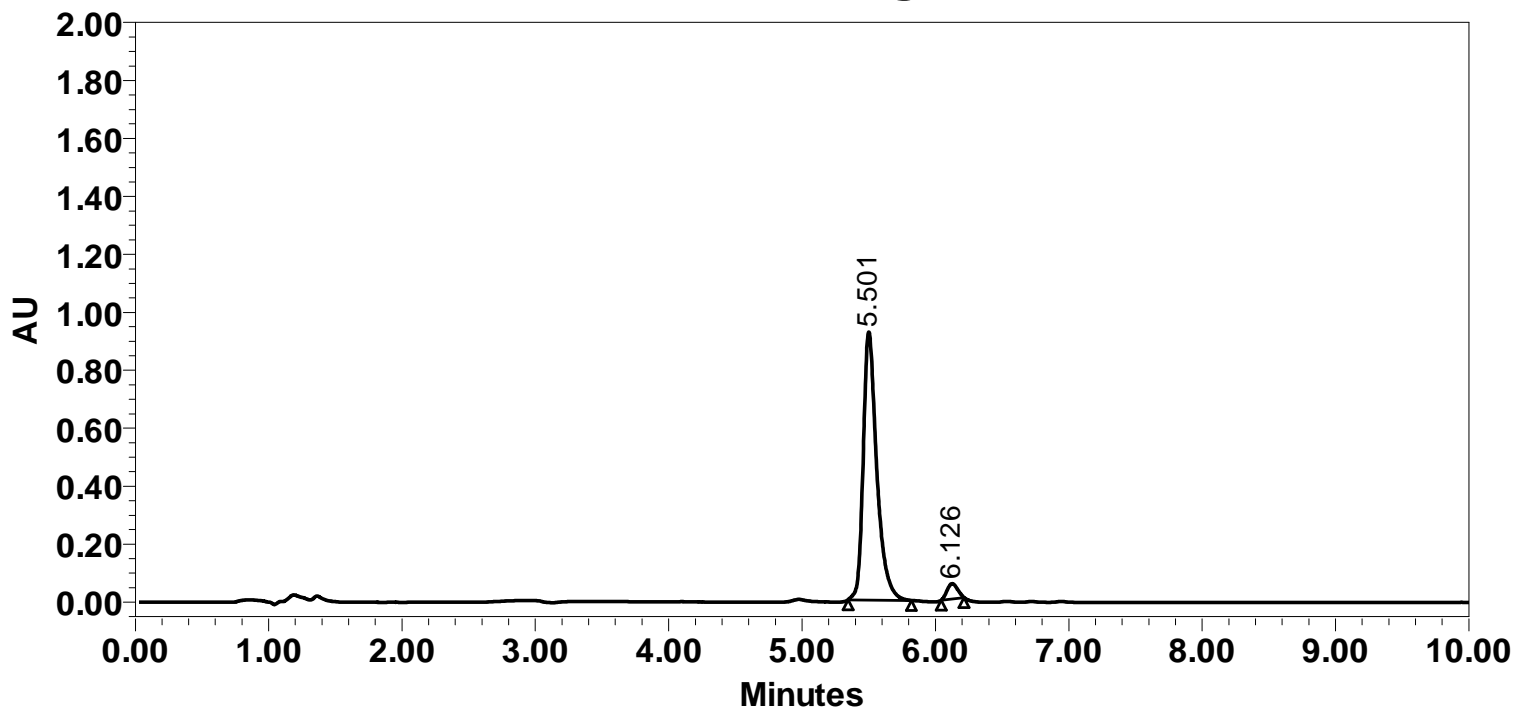

Sample Name: 18s

Vial: 17

Inj. #: 1

Date Acquired: 3/28/2016 3:55:30 PM IST

Processed Channel: 2998 Ch1  
254nm@1.2nm

|   | Processed Channel    | Retention Time (min) | Area    | % Area | Height |
|---|----------------------|----------------------|---------|--------|--------|
| 1 | 2998 Ch1 254nm@1.2nm | 5.501                | 6542991 | 95.80  | 925003 |
| 2 | 2998 Ch1 254nm@1.2nm | 6.126                | 287087  | 4.20   | 52529  |

### HPLC Chromatogram

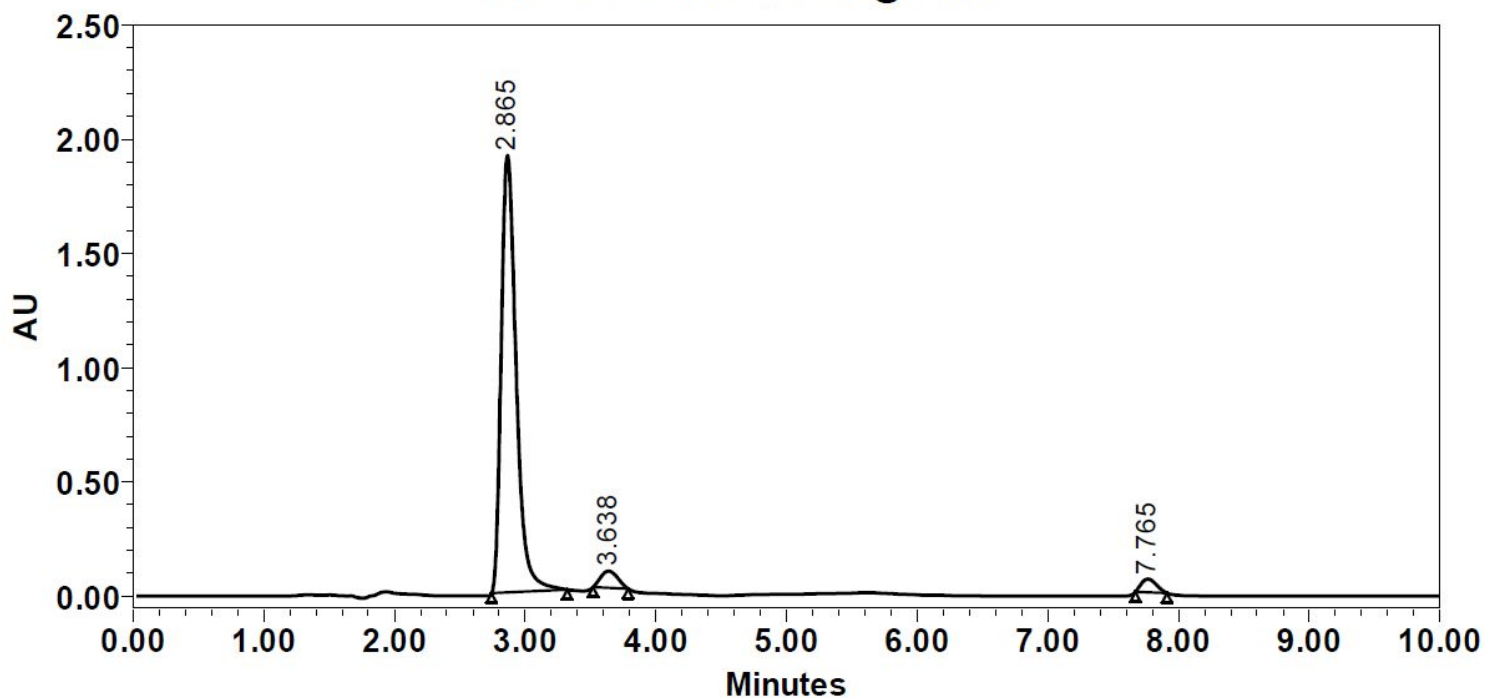

Sample Name: 10s  
 Vial: 12  
 Inj. #: 1  
 Date Acquired: 3/28/2016 7:00:22 PM IST

**Processed Channel: 2998 Ch1 254nm@1.2nm**

|   | Processed Channel    | Retention Time (min) | Area     | % Area | Height  |
|---|----------------------|----------------------|----------|--------|---------|
| 1 | 2998 Ch1 254nm@1.2nm | 2.865                | 15207752 | 93.10  | 1912139 |
| 2 | 2998 Ch1 254nm@1.2nm | 3.638                | 660592   | 4.04   | 73161   |
| 3 | 2998 Ch1 254nm@1.2nm | 7.765                | 466828   | 2.86   | 58186   |

## **HPLC-CHIP-MS.**

Agilent 1260 infinity HPLC-Chip/MS system is a microfluidic chip-based technology incorporates peptide enrichment and separation and provides high-sensitive nano-spray. Charged peptides from HPLC-Chip system were directly infused into mass-spectrometer for detection. Following HPLC-Chip-MS conditions were used for acquiring the MS and MS/MS spectrum of the peptides.

Chip ID: G4240-62030

Chip Name: High Performace Chip, 360 nanoliter enrichment column, 150 mm X 75 µm separation column

Solvent A: 0.1% Formic Acid

Solvent B: 90% ACN / 10% (0.1% Formic Acid)

Flow Rate: 0.3 µl / min

Run Time: 65 minutes

Gradient: 0 min – 3%B

56 min – 40%B

60 min – 95%B

62 min – 95%B

62.1 min 3%B

65 min – 3%B

Sample Volume: 5 µl

MS Scan Range: 275 to 1700 m/z

MS Scan Rate: 8 spectra / sec

MS/MS Scan Rate: 3 spectra / sec

Ion Polarity: Positive Ions

Fragmentor Voltage: 170 V

Skimmer Voltage: 65 V

Octopole RF Voltage: 750V

Gas Temperature: 250°C

Drying Gas: 5 L / min



# Cell migration assay

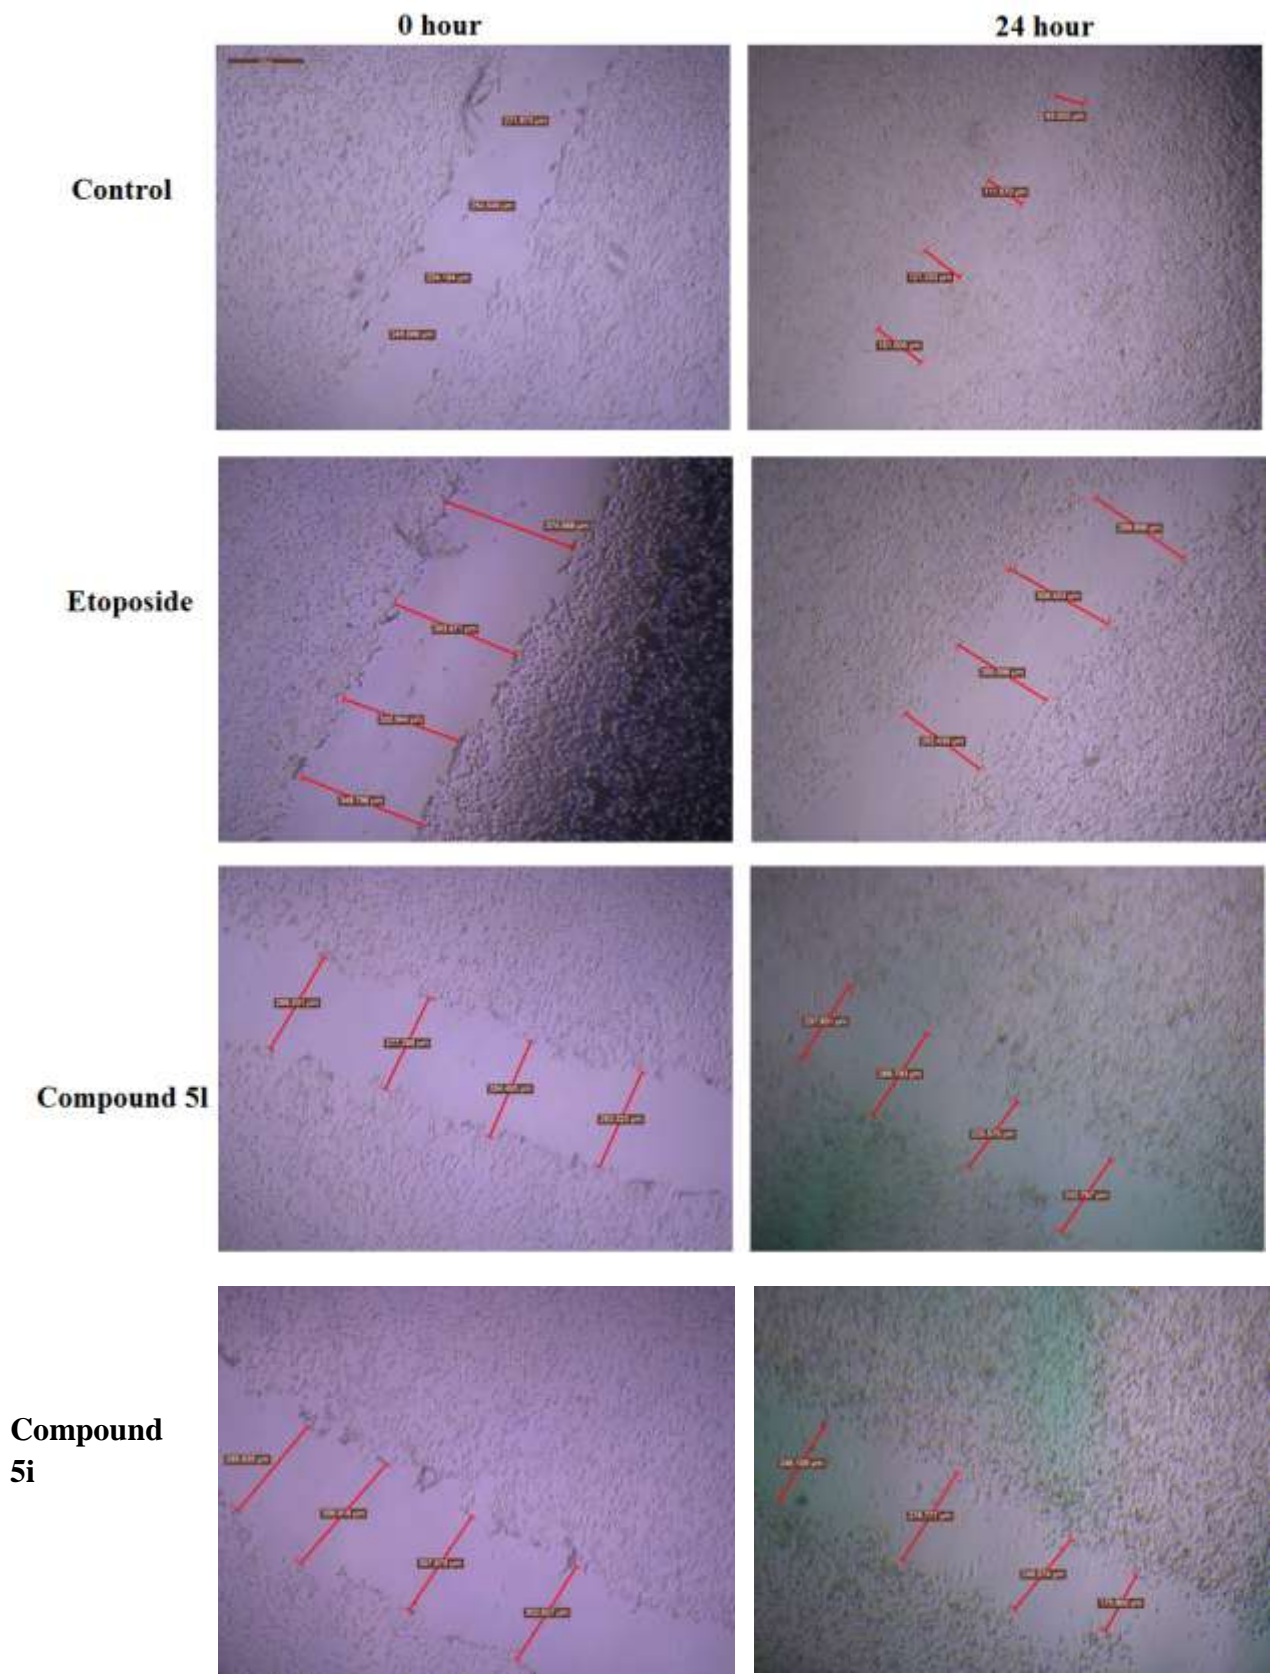

This note describes the application of the technology in identifying/de-convoluting true positive targets of a non-derivatized 'test' molecule BIS-III.

### Background and Overall Goal

Bisindolylmaleimide-III (Bis-III) a known inhibitor of GSK3 protein and it induces apoptosis in the cancerous cell-lines. At 1 $\mu$ M, Bis-III inhibits 93% of PKC $\alpha$  kinase activity and also inhibits many other protein kinases including, S6K1, MAPKAP-K1, RSK2 and MSK1 with similar potency. Additionally, it inhibits PDK1, an important kinase in the insulin signaling pathway.

In following experiments Shantani's technology was utilized to identify primary and secondary targets of BIS-III.

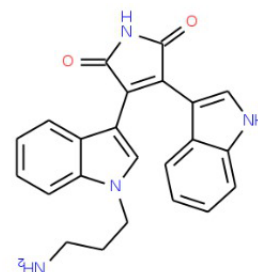

### Step-1) Immobilization of 'Bis-III' on Shantani's proprietary polymer matrix

1. Based on BIS-III compatibility with the polymer matrix; a 10 ml soluble stock solution of 0.3 mM BIS-III was prepared in HPLC water.
2. The molecule was coated on the matrix in small amount (1 ml) and allowed to dry at RT. The coating and drying of membrane was carried out till the complete 10 ml solution of Bis-III was coated on the membrane.

### Step-2) Capture and Identification of Targets

The molecule coated matrix was incubated with cell lysate for 2 minute. Excess lysate was removed and proteins were eluted with 2 ml elution buffer (1 mM Bis-III in TBST). Proteins were acetone precipitated, extracted and measured. Two similar experiments were performed - one for western blot analysis and another for Mass spec analysis.

Protein concentration from both control and test experiment was normalized and probed for GSK3-beta protein using western blot method.

## UPT - Application Notes (Target ID of Bis-III)

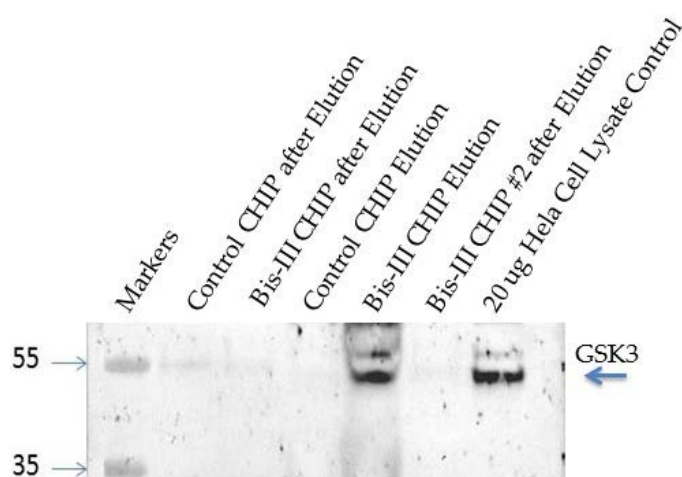

The target protein, GSK3-beta was specifically enriched on the Bis-III bound matrix.

### Step-3) Deconvolution of Targets

Following the protocol (UPT - Technical Notes) proteins were identified using the mass-spectrometry based methods and specific targets were de-convoluted. Table 1 summarizes the outcome of target deconvolution experiments.

| Uniprot ID | Protein Description                                 | Maximum Number of Unique Peptides Identified | Protein Sequence Coverage (%) | Q-Value (%) |
|------------|-----------------------------------------------------|----------------------------------------------|-------------------------------|-------------|
| Q13418     | Integrin-linked protein kinase                      | 7                                            | 18.14                         | 0           |
| Q70UQ0     | Inhibitor of nuclear factor kappa-B kinase          | 6                                            | 20.85                         | 0           |
| P28482     | Mitogen-activated protein kinase 1                  | 6                                            | 21.94                         | 0           |
| P60891     | Ribose-phosphate pyrophosphokinase 1                | 5                                            | 20.44                         | 0           |
| E9PF82     | Calcium/calmodulin-dependent protein kinase type II | 4                                            | 10.46                         | 0           |
| P49841-2   | Glycogen synthase kinase-3 beta                     | 3                                            | 11.42                         | 0           |
| P63208     | S-phase kinase-associated protein                   | 3                                            | 19.63                         | 0           |
| P51570-2   | Galactokinase                                       | 3                                            | 10.96                         | 0           |

The primary target, GSK3-beta, of BIS-III was effectively captured using the described workflow. At the same time secondary targets of the molecule were also identified.

2'-(thiophen-2-yl)spiro[indoline-3,3'-pyrrolidin]-2-one (**5n**)

Following the general procedure tryptamine (200 mg, 1.25 mmol), thiophen-2-carbaldehyde (140.2 mg, 1.25 mmol), 1:1 THF/water (20 mL) with catalytic TFA and NBS (197.5 mg, 1.37 mmol) provided the desired compound **5n** in 200 mg (yield 59%) as yellow gummy solid. <sup>1</sup>H NMR (500 MHz; DMSO-d<sub>6</sub>): 9.89 (s, 1H); 7.73-7.72 (d, *J* = 5 Hz, 1H); 7.54-7.52 (d, *J* = 10 Hz, 1H); 7.34-7.30 (m, 2H); 7.18-7.12 (m, 2H); 7.07-7.04 (t, *J* = 5 Hz, 1H); 4.11 (s, 1H); 3.49-3.46 (t, *J* = 10 Hz, 2H); 3.10-2.99 (m, 2H). <sup>13</sup>C NMR (125 MHz; DMSO-d<sub>6</sub>): 178.2, 137.2, 136.4, 130.4, 128.8, 128.5, 127.4, 125.5, 122.2, 119.1, 111.6, 70.2, 59.7, 41.5. HRMS (ESI-TOF) m/z: [M + H]<sup>+</sup> Calcd for C<sub>15</sub>H<sub>15</sub>N<sub>2</sub>OS - 271.0900, Found - 271.072; IR 3151.43, 3016.39, 1663.65, 1240.36.

2'-(pyridin-4-yl)spiro[indoline-3,3'-pyrrolidin]-2-one (**5o**):

Following the general procedure tryptamine (200 mg, 1.25 mmol), pyridine-4-carbaldehyde (134 mg, 1.25 mmol), 1:1 THF/water (20 mL) with catalytic TFA and NBS (197.5 mg, 1.37 mmol) provided the desired compound **5o** in 212 mg (yield 64%) as light yellow solid. <sup>1</sup>H NMR (500 MHz; DMSO-d<sub>6</sub>): 9.85 (s, 1H); 8.52-8.51 (d, *J* = 5 Hz, 2H); 7.43-7.41 (d, *J* = 10 Hz, 1H); 7.31-7.30 (d, *J* = 5 Hz, 2H); 7.25-7.23 (d, *J* = 10 Hz, 1H); 7.04-7.00 (t, *J* = 10 Hz, 1H); 6.98-6.94 (t, *J* = 10 Hz, 1H); 4.09 (s, 1H); 2.99-2.95 (m, 2H); 2.71-2.67 (m, 2H). <sup>13</sup>C NMR (125 MHz; DMSO-d<sub>6</sub>): 175.1, 151.6, 149.4, 136.00, 133.9, 126.7, 123.5, 120.7, 118.3, 111.0, 72.1, 59.8, 40.8. HRMS (ESI-TOF) m/z: [M + H]<sup>+</sup> Calcd for C<sub>16</sub>H<sub>16</sub>N<sub>3</sub>O - 266.1288, Found - 266.1263; IR 3112.07, 1689.19, 1398.50.

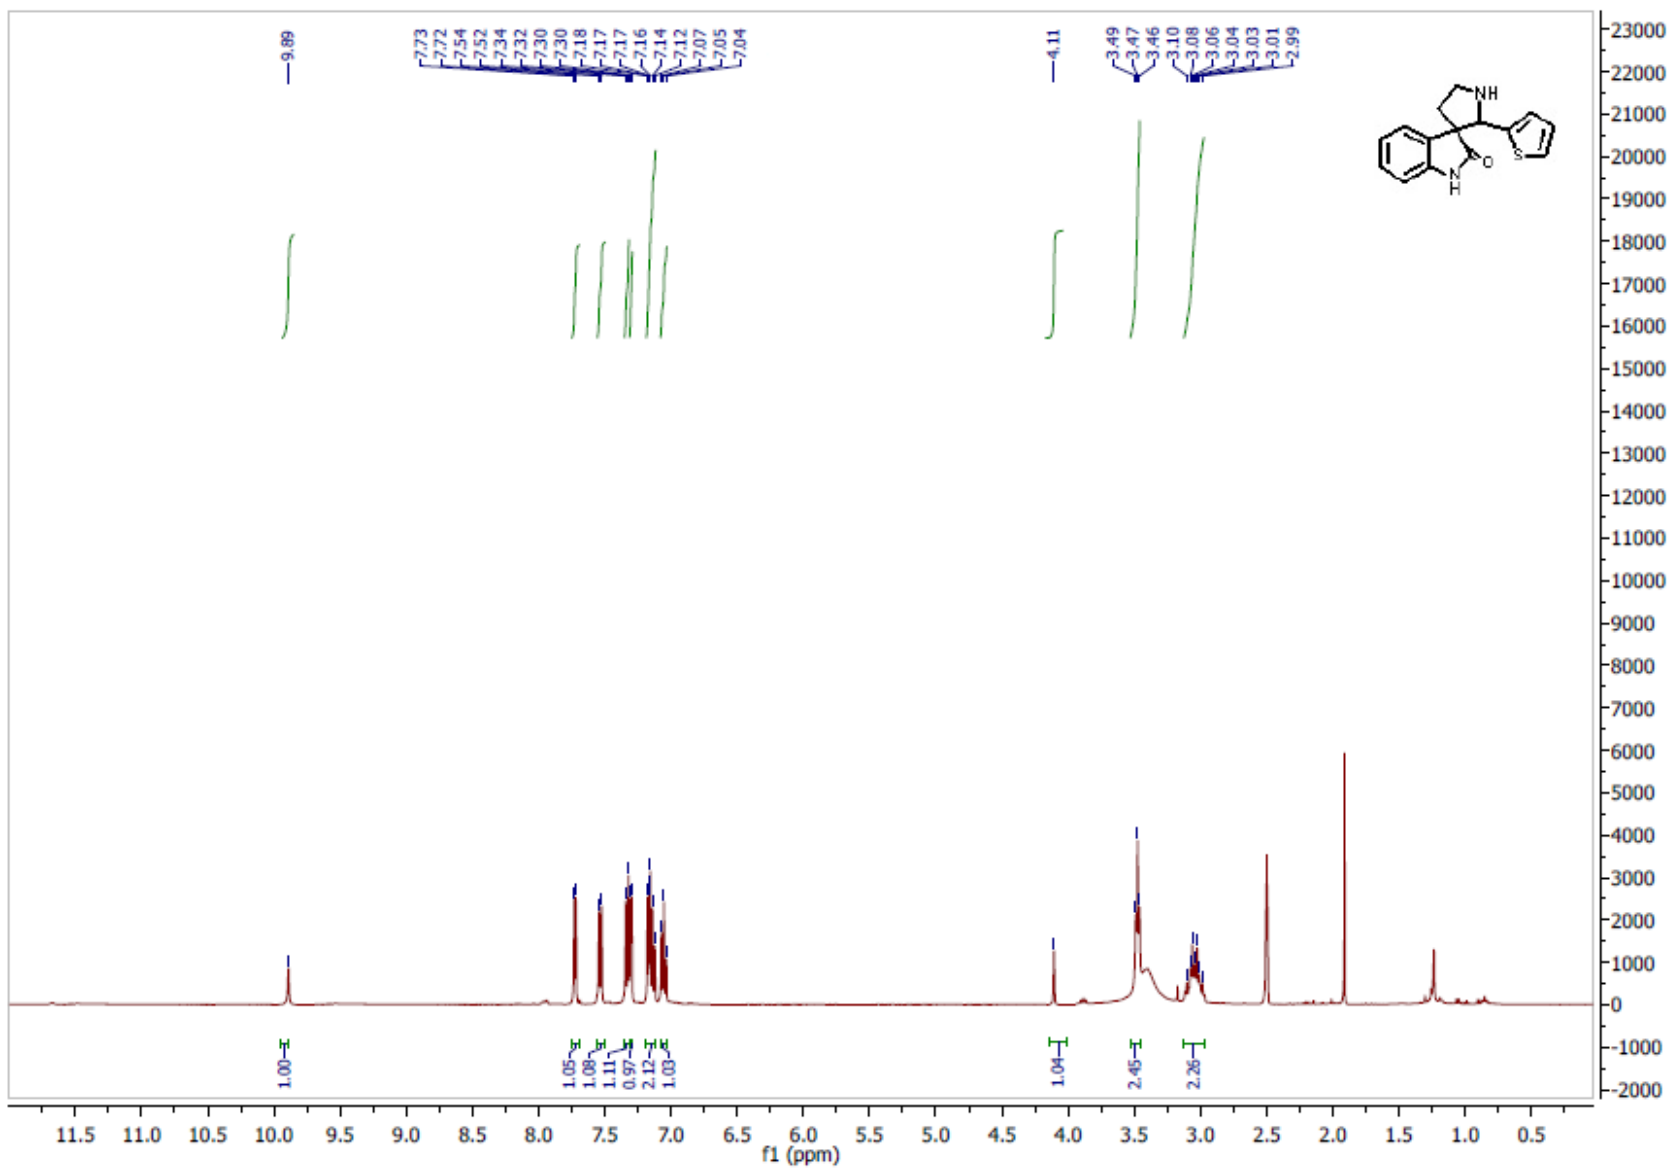

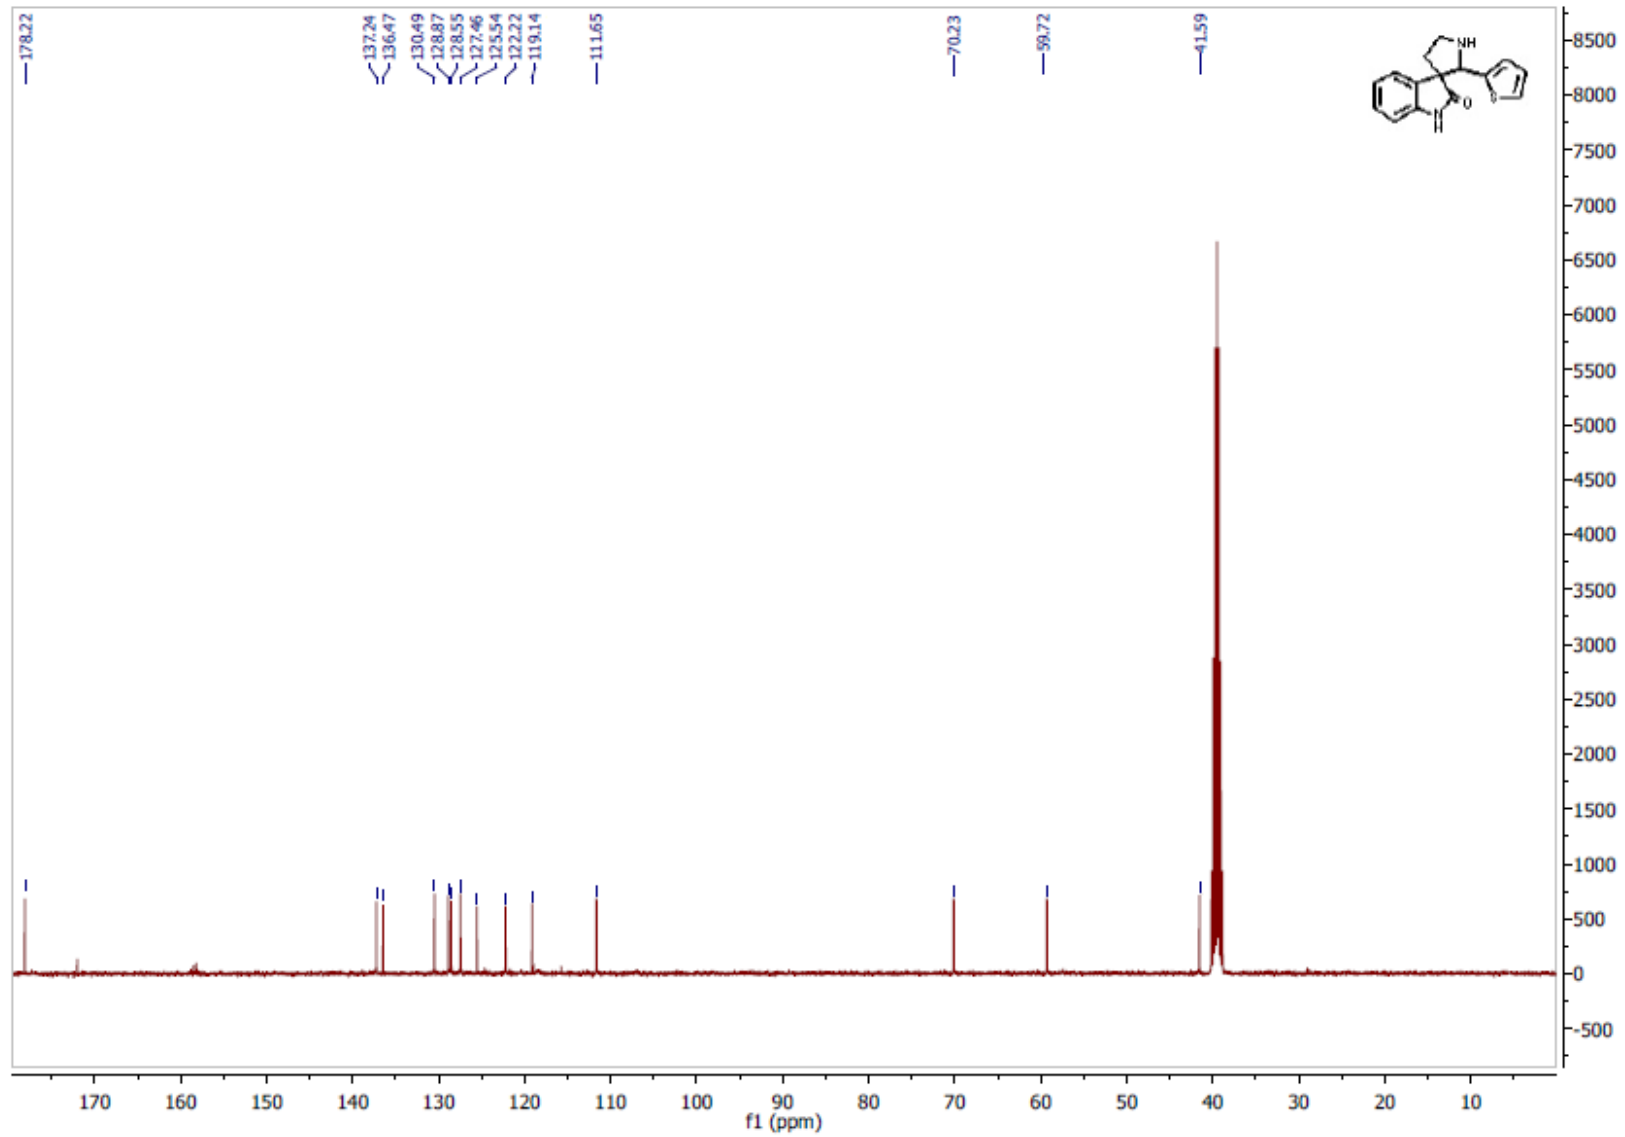

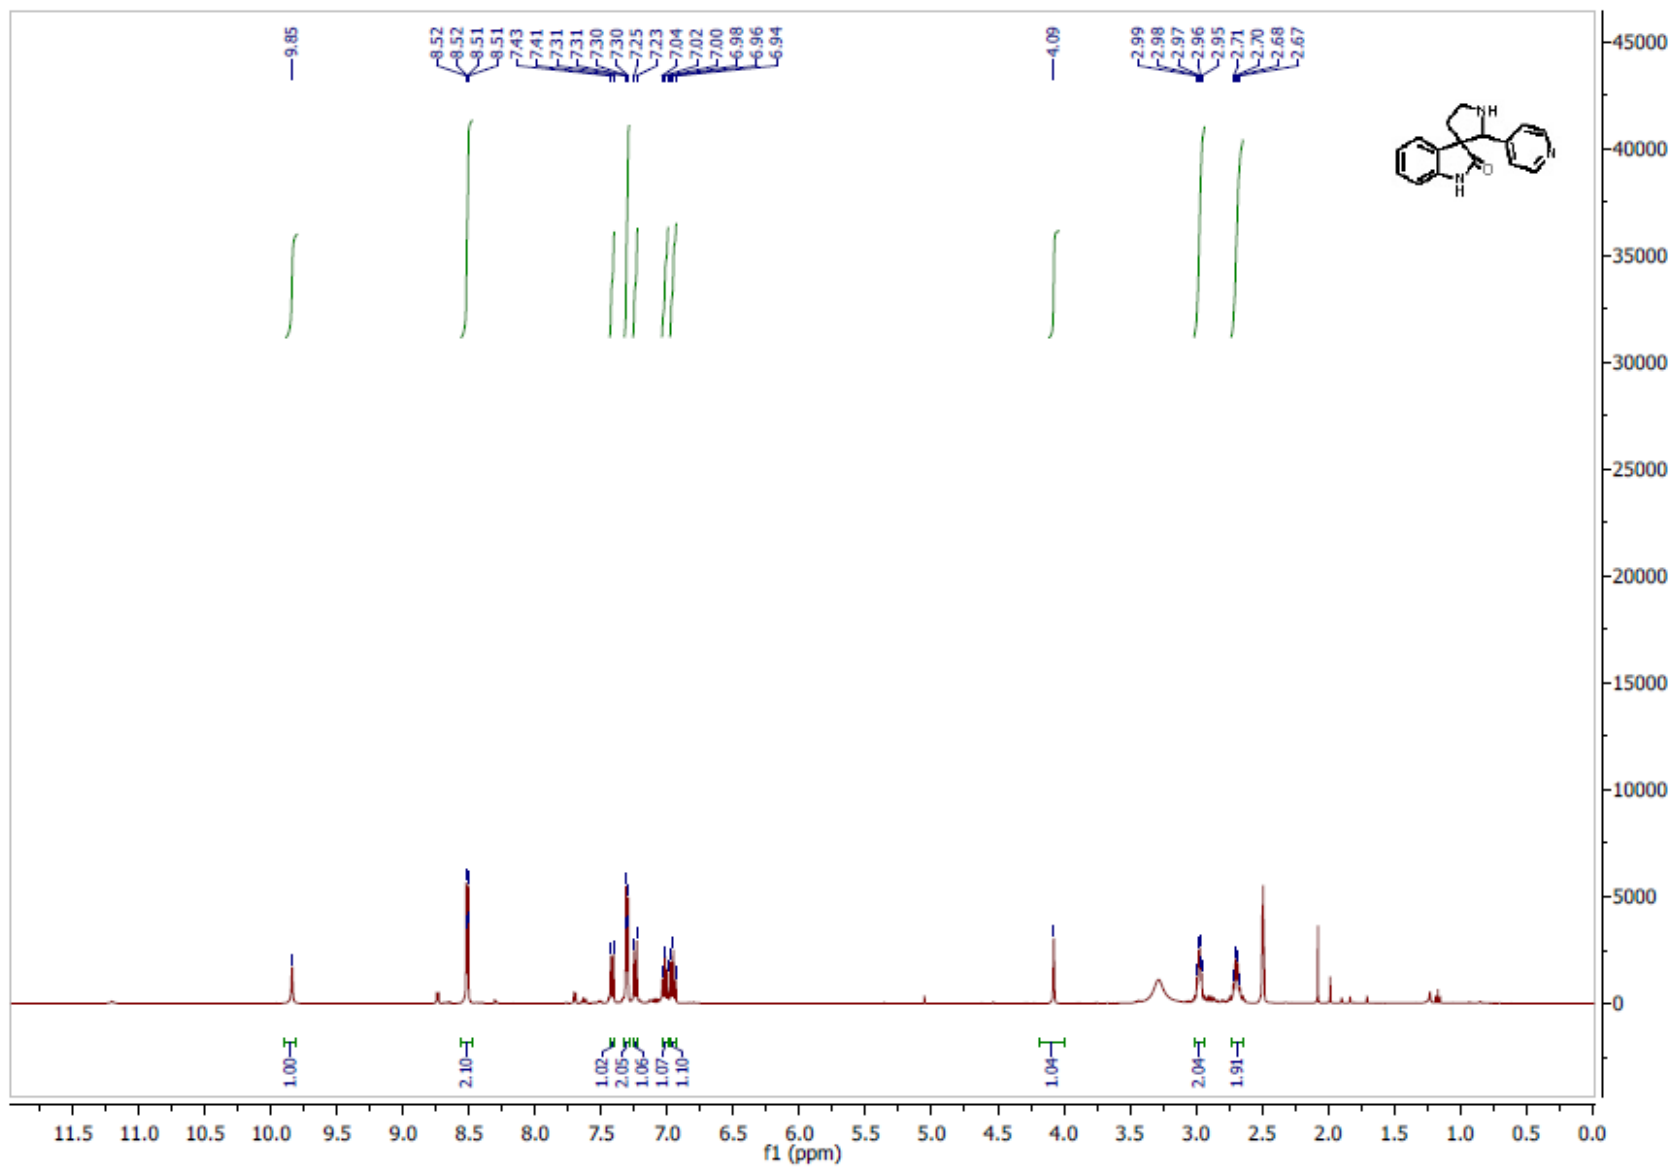

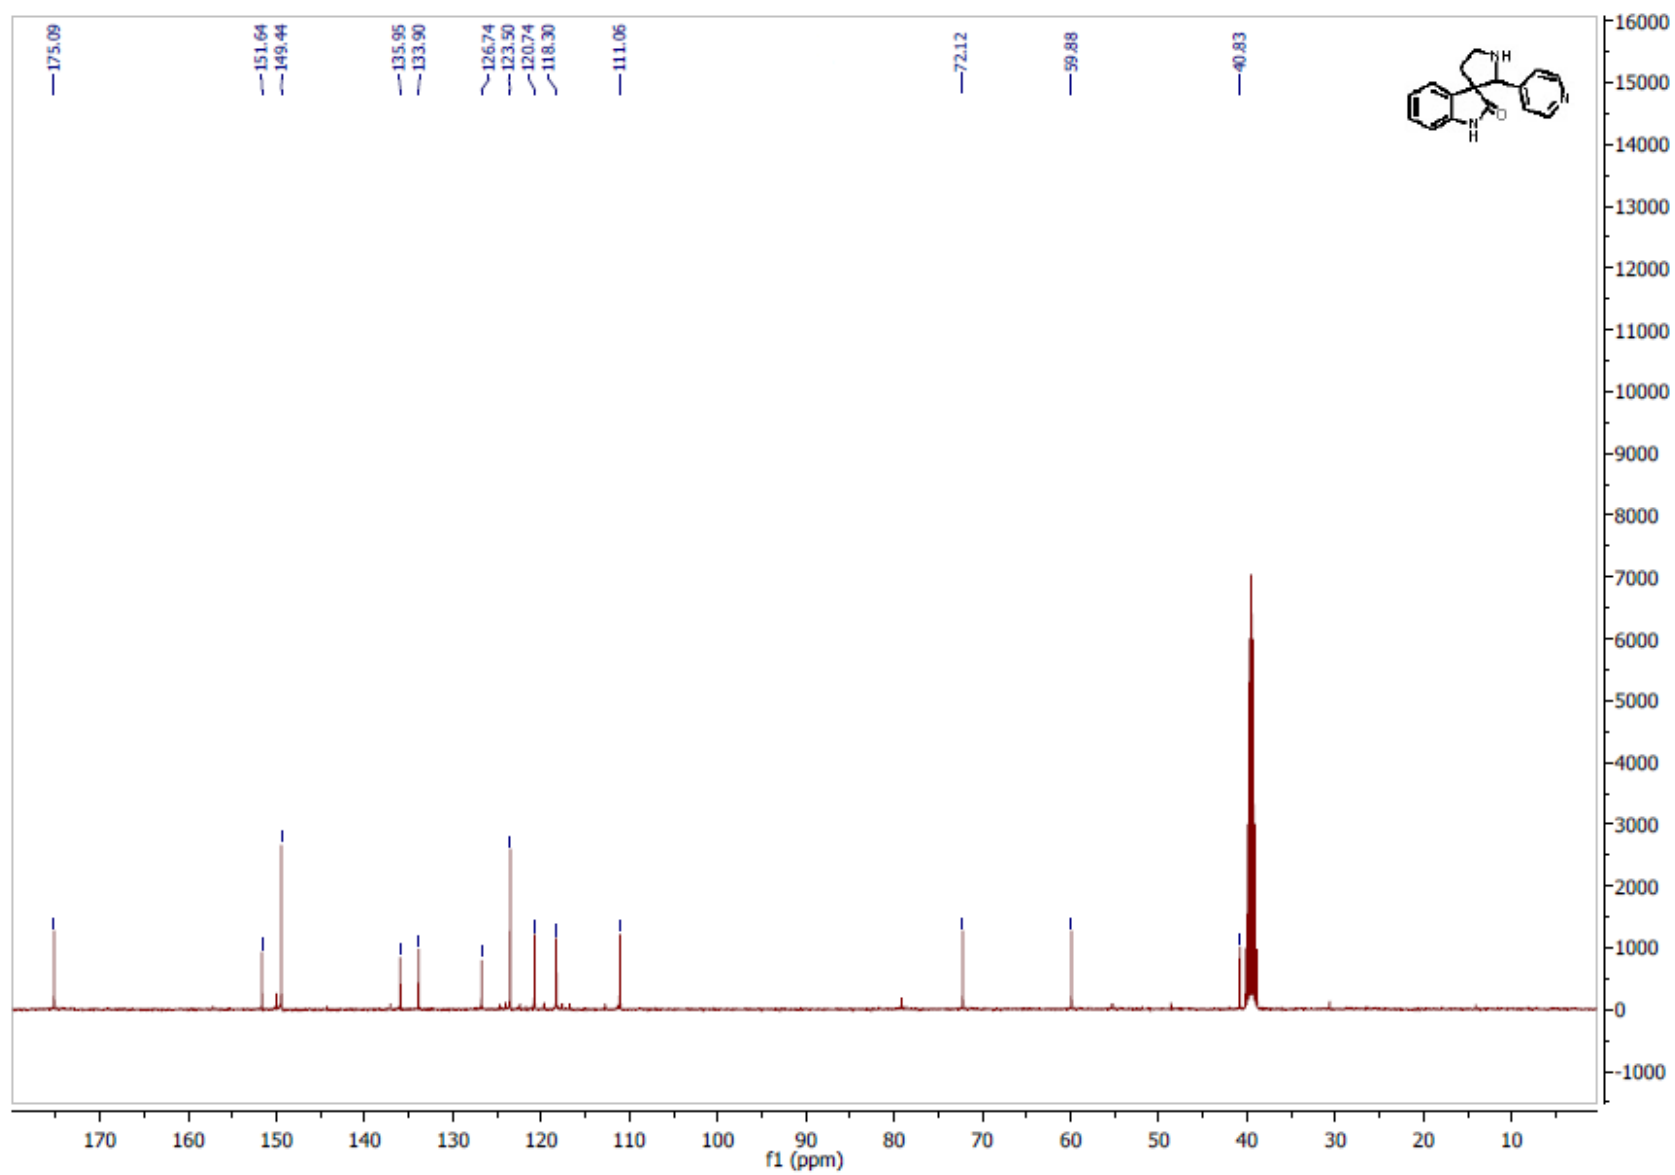



Compound 5n

### HPLC Chromatogram

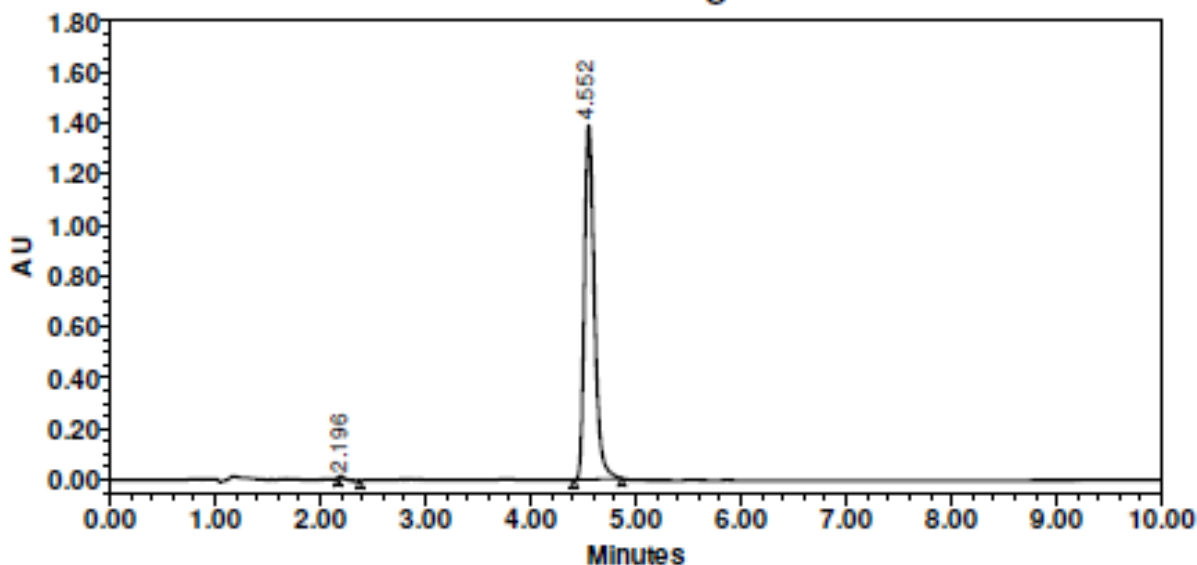

Sample Name: 19s  
Vial: 13  
Inj. #: 1  
Date Acquired: 3/25/2016 4:06:51 PM IST

Processed Channel: 2998 Ch1  
254nm@1.2nm

|   | Processed Channel    | Retention Time (min) | Area    | % Area | Height  |
|---|----------------------|----------------------|---------|--------|---------|
| 1 | 2998 Ch1 254nm@1.2nm | 2.196                | 47202   | 0.51   | 10685   |
| 2 | 2998 Ch1 254nm@1.2nm | 4.552                | 9162467 | 99.49  | 1388411 |

Reported by User: System  
Report Method: Sample Summary Table  
Report Method ID: 1479  
Page: 1 of 1

Project Name: Sen Group  
Date Printed: 7/12/2016  
11:00:05 PM Asia/Calcutta

Compound 5o

### HPLC Chromatogram

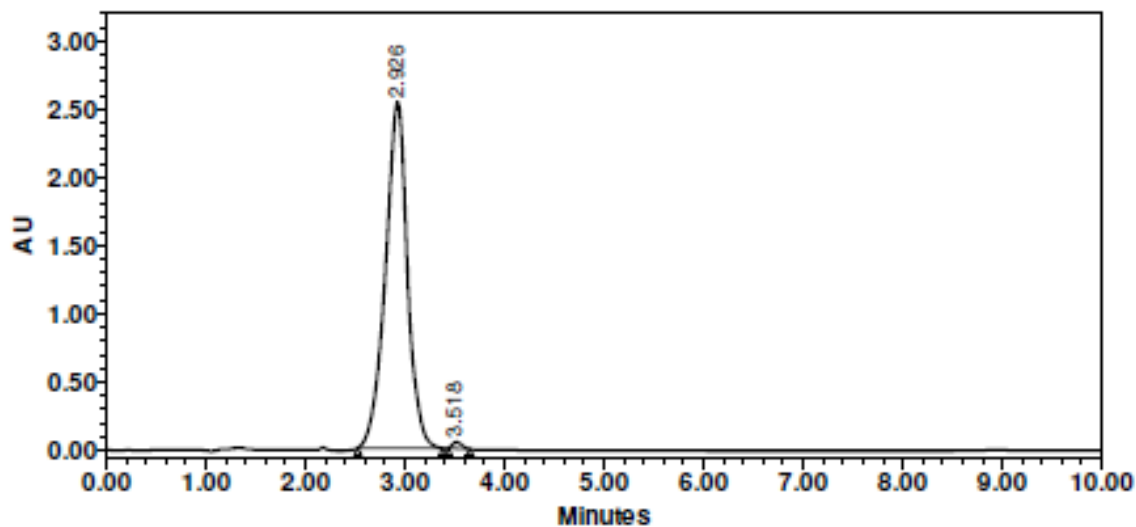

Sample Name: 20s  
Vial: 15  
Inj. #: 1  
Date Acquired: 3/25/2016 4:28:35 PM IST

Processed Channel: 2998 Ch1 254nm@1.2nm

|   | Processed Channel    | Retention Time (min) | Area     | % Area | Height  |
|---|----------------------|----------------------|----------|--------|---------|
| 1 | 2998 Ch1 254nm@1.2nm | 2.926                | 30105980 | 99.24  | 2534579 |
| 2 | 2998 Ch1 254nm@1.2nm | 3.518                | 298714   | 0.76   | 47413   |

Reported by User: System  
Report Method: Sample Summary Table  
Report Method ID: 1479  
Page: 1 of 1

Project Name: Sen Group  
Date Printed: 7/12/2016  
10:54:48 PM Asia/Calcutta

**Graphical depiction of the cell migration assay**

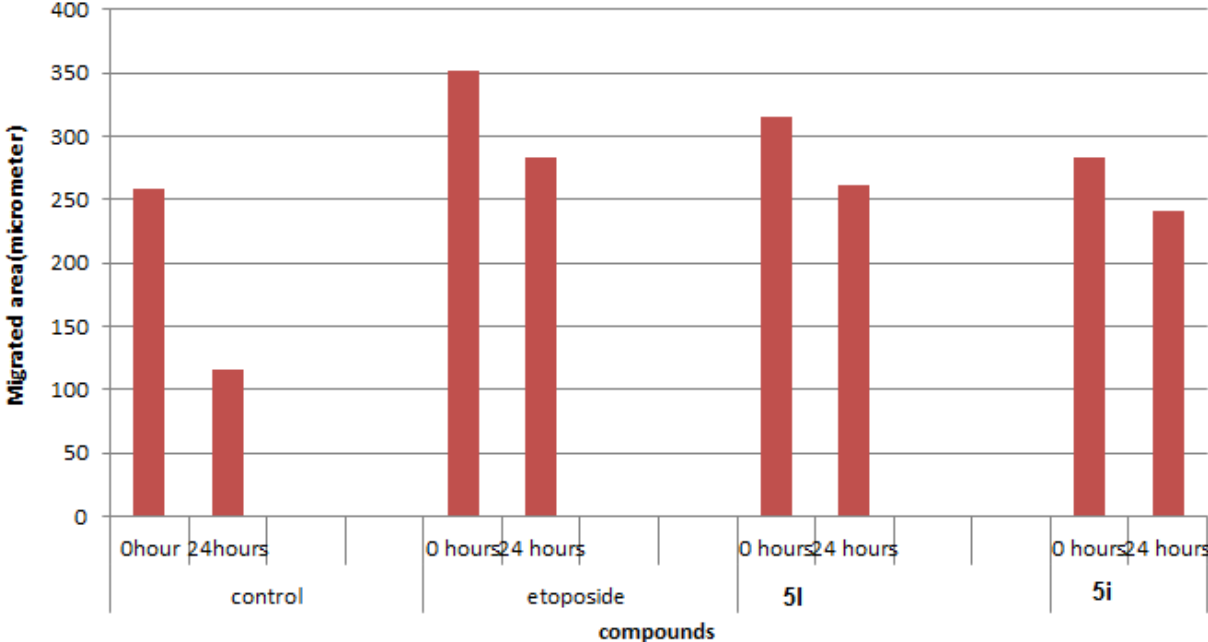

### Cytotoxicity assay with MCF 10A

|                            | Experiment :MCF10A cytotoxicity assay 48 hours |       |       |       |              |            |       |       |       |       |       |       |
|----------------------------|------------------------------------------------|-------|-------|-------|--------------|------------|-------|-------|-------|-------|-------|-------|
| Raw Data{Wavelength:595.0} |                                                |       |       |       |              |            |       |       |       |       |       |       |
|                            | 1                                              | 2     | 3     | 4     | 5            | 6          | 7     | 8     | 9     | 10    | 11    | 12    |
| A                          | 1.279                                          | 1.218 | 1.002 | 0.042 | 0.064        | 0.061      | 0.068 | 0.037 | 0.036 | 0.037 | 0.039 | 0.036 |
| B                          | 0.519                                          | 0.3   | 0.438 | 0.038 | 0.065        | 0.061      | 0.063 | 0.039 | 0.041 | 0.038 | 0.037 | 0.065 |
| C                          | 1.154                                          | 1.203 | 0.985 | 0.037 | 0.152        | 0.072      | 0.066 | 0.039 | 0.037 | 0.038 | 0.038 | 0.039 |
| D                          | 1.347                                          | 1.219 | 0.902 | 0.039 | 0.067        | 0.075      | 0.08  | 0.04  | 0.037 | 0.039 | 0.038 | 0.037 |
| E                          | 1.118                                          | 0.944 | 0.922 | 0.04  | 0.083        | 0.081      | 0.078 | 0.04  | 0.041 | 0.04  | 0.037 | 0.041 |
| F                          | 1.005                                          | 1.109 | 1.382 | 0.037 | 0.074        | 0.079      | 0.085 | 0.04  | 0.04  | 0.037 | 0.037 | 0.036 |
| G                          | 0.063                                          | 0.072 | 0.072 | 0.039 | 0.069        | 0.073      | 0.071 | 0.039 | 0.04  | 0.039 | 0.039 | 0.039 |
| H                          | 0.083                                          | 0.071 | 0.074 | 0.037 | 0.041        | 0.042      | 0.039 | 0.038 | 0.04  | 0.039 | 0.036 | 0.037 |
|                            |                                                |       |       |       |              |            |       |       |       |       |       |       |
|                            |                                                |       |       |       |              |            |       |       |       |       |       |       |
|                            | O.D1                                           | O.D2  | O.D3  | AVG   | CTRL-TEST    | CTRL-TST/C | *100  |       |       |       |       |       |
| CONTROL                    | 1.279                                          | 1.218 | 1.002 | 1.166 | 0            | 0          | 0     |       |       |       |       |       |
| DMSO                       | 0.519                                          | 0.3   | 0.438 | 0.419 | 0.7473333333 | 0.640755   | 64.07 |       |       |       |       |       |
| <b>5e</b>                  | 1.154                                          | 1.203 | 0.985 | 1.114 | 0.0523333333 | 0.04487    | 4.48  |       |       |       |       |       |
| <b>5i</b>                  | 1.347                                          | 1.219 | 0.902 | 1.156 | 0.0103333333 | 0.00886    | 0.8   |       |       |       |       |       |
| <b>5l</b>                  | 1.005                                          | 1.109 | 1.382 | 1.165 | 0.001        | 0.000857   | 0.08  |       |       |       |       |       |
